# Supplementary material for: Synthesis and biological evaluation of novel carbazolyl glyoxamides as anticancer and antibacterial agents
Source: Royal Society of Chemistry journal article supplement (doi:10.1039/c5ra27175d), 2016-01-01
Supplement: c5ra27175d1.pdf [file c5ra27175d1.pdf]

## Supporting Information

### Synthesis and biological evaluation of novel carbazolyl glyoxamides as anticancer and antibacterial agents

Venkataramana Reddy P. O,<sup>a</sup> Mukund P. Tantak,<sup>a</sup> Reyna Valdez,<sup>b</sup> Rajnish Prakash Singh,<sup>c</sup> Okram Mukherjee Singh,<sup>d</sup> Rachna Sadana<sup>b\*</sup> and Dalip Kumar<sup>a,\*</sup>

<sup>a</sup>Department of Chemistry, Birla Institute of Technology and Science, Pilani 333 031, Rajasthan, India

<sup>b</sup>Department of Natural Sciences, University of Houston – Downtown, Houston, TX 77002, United States

<sup>c</sup>Department of Biological Sciences, Birla Institute of Technology and Science, Pilani 333031, Rajasthan, India

<sup>d</sup>Department of Chemistry, Manipur University, Canchipur, Imphal-795003, Manipur, India

---

#### Table of contents

|                                                                                                  |     |
|--------------------------------------------------------------------------------------------------|-----|
| I. Experimental section                                                                          | S2  |
| II. General experimental procedure                                                               | S3  |
| III. Cytotoxicity assay                                                                          | S19 |
| IV. Antibacterial activity                                                                       | S19 |
| V. References                                                                                    | S20 |
| VI. Spectra ( <sup>1</sup> H, <sup>13</sup> C & Mass) and HPLC traces of all the final compounds | S21 |

## I Experimental Section

### General

All the reagents were purchased from commercial sources (Sigma-Aldrich, Alfa Aesar, Merck and Spectrochem). Solvents used for all reaction were dried prior to use by standard procedure. The synthesis of all the final compounds was carried out in a CEM Focused microwave. Progress of the reactions was followed by thin layer chromatography (TLC) analysis (Merck, silica gel 60 F254 in aluminium foil). Solvents were evaporated using Büchi rotary evaporator. Melting points were determined with electro thermal capillary melting point apparatus (*E-Z* melting) and were uncorrected. NMR spectra were measured on a Bruker Avance II 400 MHz (400 MHz for  $^1\text{H}$  and 100 MHz for  $^{13}\text{C}$ ) instrument using solvents  $\text{DMSO-}d_6$  and  $\text{CDCl}_3$ . Chemical shifts are reported in ppm and multiplicities are given as: s (singlet), d (doublet), t (triplet), m (multiplet), dd (double doublet), and coupling constants ( $J$ ) in hertz (Hz). IR spectra were recorded on Shimadzu IR Prestige-21 FT-IR spectrophotometer using KBr pellets. Purity of all the synthesized compounds was  $> 97\%$  as determined by WATERS 515 HPLC system with a Sunfire C-18 column ( $5\ \mu\text{m}$ ,  $4.6 \times 250\ \text{mm}$ ) and PDA detector using a flow rate of 1 mL/min. and a gradient of acetonitrile. HRMS analysis was performed on Bruker Compass Data Analysis 4.1 mass instrument.

## II General Experimental procedure

### 1. General Procedure for the synthesis of 9-(4-chlorobenzyl)-9H-carbazoles (11a-c).

A solution of potassium hydroxide (180 mmol) in 80 mL *N,N*-dimethylformamide (DMF) was stirred at room temperature for 20 min. Carbazole **10** (60 mmol) was added and the mixture was stirred for 40 min at room temperature. A solution of alkyl halide (72 mmol) in DMF (50 mL) was added drop wise with stirring. The resulting reaction mixture was then stirred at room temperature for 12 h. After completion of reaction as indicated by TLC, contents were poured into cold water (500 mL). White precipitate obtained was filtered, washed with cold water (100 mL) and recrystallized from ethanol to give pure **11a-c** in 90-95% yields.

#### 9-(4-Chlorobenzyl)-9H-carbazole (11a)

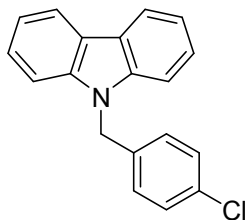

Off white solid; Yield 92%; M.p: 171-172 °C; <sup>1</sup>H NMR (400 MHz, CDCl<sub>3</sub>) δ 8.17 (d, *J* = 8.0 Hz, 2H), 7.47 (t, *J* = 8.2 Hz, 2H), 7.37-7.24 (m, 6H), 7.09 (d, *J* = 8.0 Hz, 2H), 5.51 (s, 2H); IR (KBr, ν, cm<sup>-1</sup>): 3047, 2938, 1597, 1450, 1327, 748, 725.

#### 9-Methyl-9H-carbazole (11b)

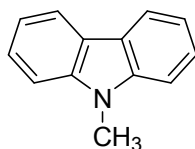

Off white solid; Yield 95%; M.p: 95 °C (lit.<sup>1</sup> mp 95-97 °C).

#### 9-Ethyl-9H-carbazole (11c)

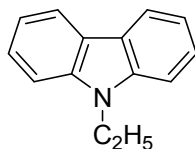

Off white solid; Yield 90%; M.P: 70-72 °C (lit.<sup>2</sup> mp 72-74 °C).

## 2. General procedure for the synthesis of carbazolyl glyoxalic esters (12a-d)

To a solution of dichloromethane (100 mL) at below 5 °C was added AlCl<sub>3</sub> (6.85 g, 51.4 mmol) portion wise, followed by ethyl chlorooxalate (9.36 g, 68.5 mmol) and slowly carbazole **11** (34.2 mmol) solution in 50 mL dichloromethane added over a period of 30 min. The reaction mixture was stirred at room temperature for 3 h. After complete disappearance of the starting material as indicated by TLC, contents were added slowly to a solution of ammonium acetate in water (200 mL). The aqueous layer was extracted with DCM (2 × 200 ml) and combined organic layer was concentrated *in vacuo*. The obtained crude product was purified by column chromatography using ethyl acetate and hexane as eluent to obtain pure compounds **12a-d** as yellow solids in good yields (50-70%).

### Ethyl 2-(9H-carbazol-3-yl)-2-oxoacetate (12a):

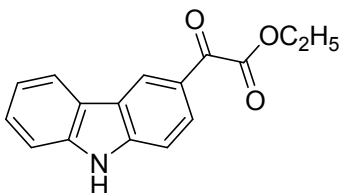

Off white solid; Yield 60%; M.p: 121-122 °C; IR (KBr,  $\nu$ , cm<sup>-1</sup>): 3302, 2901, 1728, 1659, 1628, 1582, 1335, 1250, 1119, 1057, 717, 671.

### Ethyl 2-(9-(4-chlorobenzyl)-9H-carbazol-3-yl)-2-oxoacetate (12b):

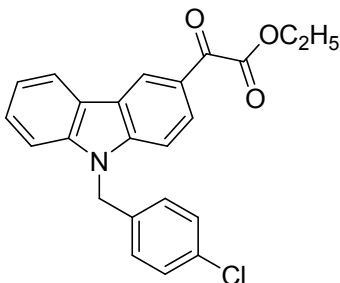

Off white solid; Yield 67%; M.p: 129-131 °C; <sup>1</sup>H NMR (400 MHz, CDCl<sub>3</sub>)  $\delta$  8.84 (s, 1H), 8.19 (d,  $J$  = 7.7 Hz, 1H), 8.13 (d,  $J$  = 8.7 Hz, 1H), 7.52 (t,  $J$  = 7.7 Hz, 1H), 7.39 (dd,  $J$  = 9.2, 4.6 Hz, 3H), 7.29–7.24 (m, 2H), 7.06 (d,  $J$  = 8.3 Hz, 2H), 5.52 (s, 2H), 4.54 (q,  $J$  = 7.1 Hz, 2H), 1.49 (t,  $J$  = 7.1 Hz, 3H); <sup>13</sup>C NMR (101 MHz, CDCl<sub>3</sub>)  $\delta$  186.0, 164.9, 144.4, 141.4, 134.7, 133.9, 130.1, 129.1, 128.6, 128.2, 127.6, 127.1, 124.9, 124.6, 123.5, 121.9, 120.5, 108.5, 63.9, 62.4, 46.4; IR (KBr,  $\nu$ , cm<sup>-1</sup>): 3063, 2978, 2932, 1728, 1666, 1589, 1474, 1188, 1026, 841, 802, 748.

### Ethyl 2-(9-methyl-9H-carbazol-3-yl)-2-oxoacetate (12c)

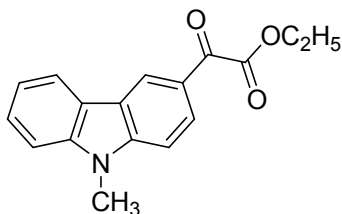

Yellow oil; Yield 50%;  $^1\text{H NMR}$  (400 MHz,  $\text{CDCl}_3$ )  $\delta$  8.78 (d,  $J = 2.1$  Hz, 1H), 8.19–8.12 (m, 2H), 7.58–7.54 (m, 1H), 7.44 (t,  $J = 8.7$  Hz, 2H), 7.38–7.32 (m, 1H), 4.54 (q,  $J = 7.2$  Hz, 2H), 3.88 (s, 3H), 1.50 (t,  $J = 7.2$  Hz, 3H).

### Ethyl 2-(9-ethyl-9H-carbazol-3-yl)-2-oxoacetate (12d)

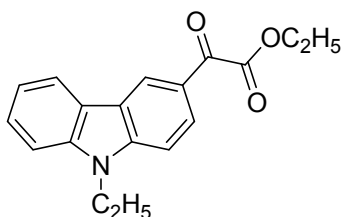

Yellow oil; Yield 57%;  $^1\text{H NMR}$  (400 MHz,  $\text{CDCl}_3$ )  $\delta$  8.79 (d,  $J = 1.3$  Hz, 1H), 8.17–8.13 (m, 2H), 7.57–7.53 (m, 1H), 7.44 (t,  $J = 8.7$  Hz, 2H), 7.36–7.31 (m, 1H), 4.54 (q,  $J = 7.2$  Hz, 2H), 4.37 (q,  $J = 7.2$  Hz, 2H), 1.50 (t,  $J = 7.2$  Hz, 3H), 1.46 (t,  $J = 7.3$  Hz, 3H).

### 3. General procedure for the synthesis of carbazolyl glyoxalic acids (13a-d)

Carbazolyl glyoxalic esters **12** (12.8 mmol) was dissolved in 100 mL THF:H<sub>2</sub>O (1:1). Lithium hydroxide monohydrate (2.7 g, 64 mmol) was added to the reaction mixture in portion wise. The resulting reaction mixture was stirred for 90 min at room temperature. Upon completion of the reaction as indicated by TLC, excess of THF was evaporated under *vacuo* to give residue which was dissolved in water (50 mL) and acidified up to pH~2 using 2N HCl (50 mL). The obtained solid was filtered, washed with water and dried to afford compounds **13a-d** as yellow solids in excellent yields (90-97%).

#### 2-(9H-Carbazol-3-yl)-2-oxoacetic acid (13a):

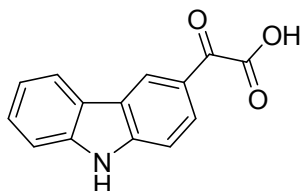

White solid; Yield 90%; M.p: 215-217 °C; IR (KBr,  $\nu$ ,  $\text{cm}^{-1}$ ): 3358, 2953, 1713, 1659, 1589, 1327, 1180, 918, 795, 741.

**2-(9-(4-Chlorobenzyl)-9H-carbazol-3-yl)-2-oxoacetic acid (13b):**

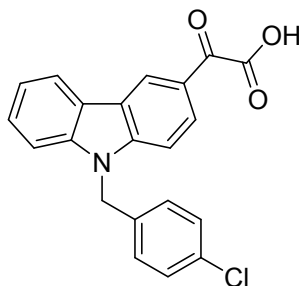

Yield 94%; off white solid; M.p: 183-185 °C;  $^1\text{H}$  NMR (400 MHz,  $\text{DMSO-}d_6$ )  $\delta$  8.83 (s, 1H), 8.35 (d,  $J = 7.7$  Hz, 1H), 8.03 (d,  $J = 8.5$  Hz, 1H), 7.82 (d,  $J = 8.7$  Hz, 1H), 7.70 (d,  $J = 8.2$  Hz, 1H), 7.52 (t,  $J = 7.6$  Hz, 1H), 7.34–7.30 (m, 3H), 7.18 (d,  $J = 7.9$  Hz, 2H), 5.74 (s, 2H);  $^{13}\text{C}$  NMR (101 MHz,  $\text{DMSO-}d_6$ )  $\delta$  189.3, 167.9, 144.2, 141.4, 136.5, 132.6, 129.2, 129.1, 127.9, 127.6, 124.2, 123.8, 123.0, 122.9, 121.6, 121.2, 110.8, 110.5, 45.7; IR (KBr,  $\nu$ ,  $\text{cm}^{-1}$ ): 3232, 2946, 1759, 1660, 1582, 1497, 1342, 1142, 802, 741.

**2-(9-Methyl-9H-carbazol-3-yl)-2-oxoacetic acid (13c)**

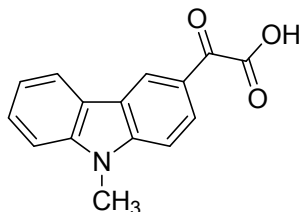

Yellow solid; Yield 92%; M.p: 162-163 °C. IR (KBr,  $\nu$ ,  $\text{cm}^{-1}$ ): 3318, 2953, 1739, 1663, 1580, 1323, 1243, 1180, 908, 795.

**2-(9-Ethyl-9H-carbazol-3-yl)-2-oxoacetic acid (13d)**

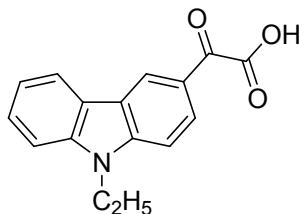

Yellow solid; Yield 97%; M.p: 173 °C. IR (KBr,  $\nu$ ,  $\text{cm}^{-1}$ ): 3267, 2956, 1725, 1669, 1592, 1455, 1335, 1263, 1188, 803, 741.

#### 4. General procedure for the synthesis of carbazolyl glyoxamides (14a-x)

To a 10 mL microwave tube was added carbazole glyoxalic acid **13** (0.275 mmol), HATU (0.12 g, 0.317 mmol), *N,N*-diisopropylethylamine (0.09 g, 0.687 mmol) and an appropriate aryl/heteroarylamine (0.303 mmol) in DMF (2 mL). The tube was sealed with a pressure cap and placed in the microwave cavity. The sample was irradiated for 45 min at 70 °C and then allowed to cool at room temperature. The residue was poured into ice-cold water (30 mL) and stirred for 20 min at room temperature. The solid so obtained was filtered, dried and purified by column chromatography on silica gel using ethylacetate:hexane (3:7) as eluent to obtain pure (**14a-g**, **14j-o** and **14q**) in excellent yields. Some of the compounds (**14h-i** and **14p**) were crystallized from acetone to obtain pure products in 70-91% yields.

#### 2-(9-(4-Chlorobenzyl)-9H-carbazol-3-yl)-2-oxo-*N*-phenylacetamide (14a).

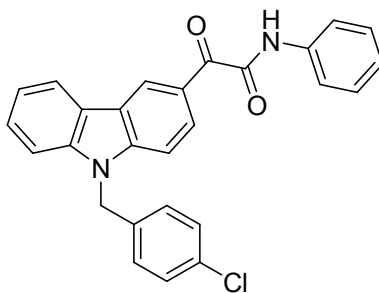

Yellow solid; Yield 70%; M.p: 191-193 °C; <sup>1</sup>H NMR (400 MHz, CDCl<sub>3</sub>) δ 9.47 (d, *J* = 1.3 Hz, 1H), 9.15 (s, 1H), 8.58 (dd, *J* = 8.8, 1.7 Hz, 1H), 8.25 (dd, *J* = 7.6, 1.1 Hz, 1H), 7.78 (dd, *J* = 8.6, 1.0 Hz, 2H), 7.54–7.50 (m, 1H), 7.45 (dd, *J* = 8.3, 7.5 Hz, 3H), 7.41–7.36 (m, 3H), 7.26 (t, *J* = 2.6 Hz, 2H), 7.08 (d, *J* = 8.6 Hz, 2H), 5.55 (s, 2H); <sup>13</sup>C NMR (101 MHz, CDCl<sub>3</sub>) δ 185.9, 160.0, 144.2, 141.2, 136.9, 134.6, 133.7, 129.8, 129.3, 129.2, 127.7, 127.0, 126.2, 125.2, 125.0, 123.6, 123.1, 121.1, 121.1, 120.0, 109.5, 108.8, 46.24; IR (KBr, ν, cm<sup>-1</sup>): 3335, 3090, 3052, 2916, 1682, 1653, 1589, 1520, 1435, 1307, 1250, 1134, 1011, 825, 795; Anal. RP-HPLC *t*<sub>R</sub> = 4.641 min, purity 98.55%; HRMS (ESI<sup>+</sup>) Calculated for C<sub>27</sub>H<sub>20</sub>ClN<sub>2</sub>O<sub>2</sub> [M + H]<sup>+</sup>, 439.1213; Found 439.1208 and 461.1025 [M + Na]<sup>+</sup>.

**2-(9-(4-Chlorobenzyl)-9H-carbazol-3-yl)-2-oxo-N-(p-tolyl)acetamide (14b).**

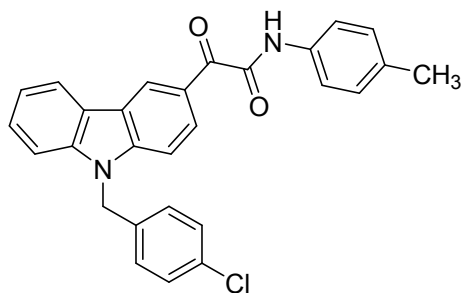

Yellow solid; Yield 72%; M.p: 172-173 °C; <sup>1</sup>H NMR (400 MHz, CDCl<sub>3</sub>) δ 9.48 (d, *J* = 1.6 Hz, 1H), 9.09 (s, 1H), 8.58 (dd, *J* = 8.8, 1.7 Hz, 1H), 8.27–8.23 (m, 1H), 7.67–7.64 (m, 2H), 7.53–7.49 (m, 1H), 7.44–7.35 (m, 3H), 7.26 (t, *J* = 2.2 Hz, 3H), 7.24 (s, 1H), 7.09 (d, *J* = 8.6 Hz, 2H), 5.55 (s, 2H), 2.39 (s, 3H); <sup>13</sup>C NMR (101 MHz, CDCl<sub>3</sub>) δ 186.0, 159.9, 144.2, 141.1, 134.9, 134.6, 134.3, 133.7, 129.9, 129.7, 129.2, 127.7, 126.9, 126.1, 125.1, 123.6, 123.1, 121.1, 121.0, 119.9, 109.5, 108.7, 46.2, 21.0; IR (KBr, ν, cm<sup>-1</sup>): 3325, 3094, 3055, 2916, 1682, 1651, 1620, 1582, 1520, 1443, 1327, 1265, 1149; Anal. RP-HPLC *t*<sub>R</sub> = 5.317 min, purity 98.10%; HRMS (ESI<sup>+</sup>) Calculated for C<sub>28</sub>H<sub>21</sub>ClN<sub>2</sub>O<sub>2</sub> [M + H]<sup>+</sup>, 453.1369; Found 453.1365 and 475.1183 [M + Na]<sup>+</sup>

**2-(9-(4-Chlorobenzyl)-9H-carbazol-3-yl)-N-(4-methoxyphenyl)-2-oxoacetamide (14c).**

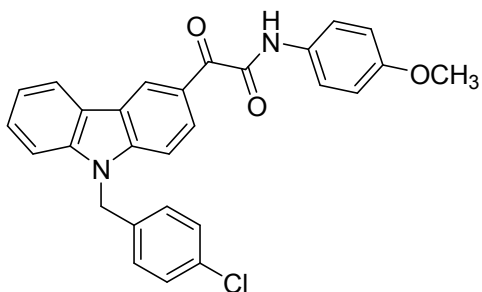

Yellow solid; Yield 72%; M.p: 168-170 °C; <sup>1</sup>H NMR (400 MHz, CDCl<sub>3</sub>) δ 9.45 (d, *J* = 1.5 Hz, 1H), 9.04 (s, 1H), 8.56 (dd, *J* = 8.8, 1.7 Hz, 1H), 8.22 (d, *J* = 7.7 Hz, 1H), 7.69–7.65 (m, 2H), 7.51–7.47 (m, 1H), 7.42–7.32 (m, 4H), 7.25–7.23 (m, 1H), 7.06 (d, *J* = 8.5 Hz, 2H), 6.97–6.94 (m, 2H), 5.52 (s, 2H), 3.84 (s, 3H); <sup>13</sup>C NMR (101 MHz, CDCl<sub>3</sub>) δ 186.1, 159.8, 157.0, 144.2, 141.1, 134.6, 133.7, 130.1, 129.7, 129.2, 127.7, 126.9, 126.1, 125.1, 123.6, 123.1, 121.6, 121.1, 121.0, 114.4, 109.5, 108.7, 55.5, 46.2; IR (KBr, ν, cm<sup>-1</sup>): 3348, 3055, 2924, 1682, 1643, 1620, 1582, 1528, 1443, 1327, 1250, 1149; Anal. RP-HPLC *t*<sub>R</sub> = 4.368 min, purity 98.67%; HRMS (ESI<sup>+</sup>) Calculated for C<sub>28</sub>H<sub>22</sub>ClN<sub>2</sub>O<sub>3</sub> [M + H]<sup>+</sup>, 469.1319; Found 469.1310, 471.1271 [M + H + 2]<sup>+</sup> and 491.1129 [M + Na]<sup>+</sup>.



**2-(9-(4-Chlorobenzyl)-9H-carbazol-3-yl)-N-(3-methoxyphenyl)-2-oxoacetamide (14d).**

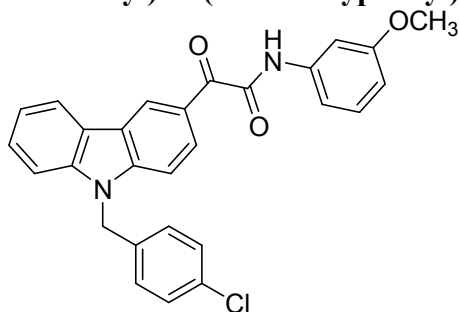

Yellow solid; Yield 73%; M.p: 106-107 °C;  $^1\text{H}$  NMR (400 MHz,  $\text{CDCl}_3$ )  $\delta$  9.43 (s, 1H), 9.11 (s, 1H), 8.57–8.54 (m, 1H), 8.23 (d,  $J = 7.7$  Hz, 1H), 7.52–7.46 (m, 2H), 7.40–7.33 (m, 3H), 7.31–7.28 (m, 2H), 7.24–7.19 (m, 2H), 7.06 (d,  $J = 8.3$  Hz, 2H), 6.77 (dd,  $J = 7.8, 1.6$  Hz, 1H), 5.52 (s, 2H), 3.87 (s, 3H);  $^{13}\text{C}$  NMR (101 MHz,  $\text{CDCl}_3$ )  $\delta$  185.8, 160.3, 159.9, 144.2, 141.1, 138.1, 134.6, 133.7, 129.9, 129.7, 129.2, 127.7, 126.9, 126.1, 124.9, 123.5, 123.1, 121.1, 121.0, 112.2, 111.1, 109.5, 108.7, 105.5, 55.4, 46.2; IR (KBr,  $\nu$ ,  $\text{cm}^{-1}$ ): 3333, 3055, 2932, 2862, 1693, 1659, 1589, 1528, 1381, 1335, 1265, 1203, 1142, 1088, 1041, 849, 795, 725, 687, 679; Anal. RP-HPLC  $t_{\text{R}} = 4.550$  min, purity 98.36%; HRMS (ESI $^+$ ) Calculated for  $\text{C}_{28}\text{H}_{22}\text{ClN}_2\text{O}_3$   $[\text{M} + \text{H}]^+$ , 469.1319; Found 469.1313 and 491.1133  $[\text{M} + \text{Na}]^+$ .

**2-(9-(4-Chlorobenzyl)-9H-carbazol-3-yl)-N-(3,4-dimethoxyphenyl)-2-oxoacetamide (14e)**

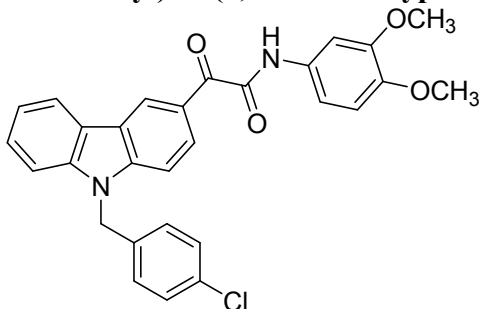

Yellow solid; Yield 70%; M.p: 136-137 °C;  $^1\text{H}$  NMR (400 MHz,  $\text{CDCl}_3$ )  $\delta$  9.43 (s, 1H), 9.08 (s, 1H), 8.56 (d,  $J = 8.7$  Hz, 1H), 8.23 (d,  $J = 7.7$  Hz, 1H), 7.55 (d,  $J = 2.0$  Hz, 1H), 7.49 (t,  $J = 7.7$  Hz, 1H), 7.40–7.33 (m, 3H), 7.24 (s, 2H), 7.16 (dd,  $J = 8.5, 2.1$  Hz, 1H), 7.06 (d,  $J = 8.2$  Hz, 2H), 6.89 (d,  $J = 8.6$  Hz, 1H), 5.51 (s, 2H), 3.96 (s, 3H), 3.90 (s, 3H);  $^{13}\text{C}$  NMR (101 MHz,  $\text{CDCl}_3$ )  $\delta$  186.0, 159.7, 149.2, 146.5, 144.2, 141.1, 134.6, 133.7, 130.6, 129.7, 129.2, 127.7, 126.9, 126.1, 125.1, 123.6, 123.1, 121.1, 121.0, 112.1, 111.4, 109.5, 108.7, 104.5, 56.1, 56.0, 46.2; IR (KBr,  $\nu$ ,  $\text{cm}^{-1}$ ): 3317, 3055, 2924, 2847, 1690, 1651, 1589, 1520, 1458, 1412, 1381, 1335, 1242, 1203, 1134, 1026, 849, 795, 748, 663, 602, 540; Anal. RP-HPLC  $t_{\text{R}} = 4.031$  min, purity 98.17%;

HRMS (ESI<sup>+</sup>) Calculated for C<sub>29</sub>H<sub>24</sub>ClN<sub>2</sub>O<sub>4</sub> [M + H]<sup>+</sup>, 499.1424; Found 499.1424, 501.1390 [M + H + 2]<sup>+</sup> and 521.1238 [M + Na]<sup>+</sup>.

**2-(9-(4-Chlorobenzyl)-9H-carbazol-3-yl)-2-oxo-N-(3,4,5-trimethoxyphenyl)acetamide (14f).**

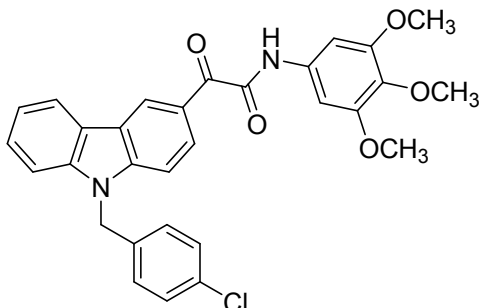

Yellow solid; Yield 71%; M.p: 183-184 °C; <sup>1</sup>H NMR (400 MHz, CDCl<sub>3</sub>) δ 9.43 (s, 1H), 9.15 (s, 1H), 8.57 (dd, *J* = 8.8, 1.6 Hz, 1H), 8.25 (d, *J* = 7.6 Hz, 1H), 7.55–7.49 (m, 1H), 7.40 (t, *J* = 8.6 Hz, 3H), 7.29–7.25 (m, 3H), 7.08 (d, *J* = 8.6 Hz, 3H), 5.53 (s, 2H), 3.94 (s, 6H), 3.89 (s, 3H); <sup>13</sup>C NMR (101 MHz, CDCl<sub>3</sub>) δ 185.8, 159.9, 153.5, 144.2, 141.1, 135.3, 134.6, 133.7, 133.0, 129.7, 129.1, 127.7, 127.0, 126.0, 124.9, 123.5, 123.1, 121.1, 121.0, 109.5, 108.8, 97.5, 61.0, 56.2, 46.2; IR (KBr, ν, cm<sup>-1</sup>): 3356, 2932, 1690, 1651, 1597, 1528, 1504, 1450, 1412, 1373, 1335, 1296, 1250, 1126, 1011, 802; Anal. RP-HPLC t<sub>R</sub> = 4.181 min, purity 98.17%; HRMS (ESI<sup>+</sup>) Calculated for C<sub>30</sub>H<sub>26</sub>ClN<sub>2</sub>O<sub>5</sub> [M + H]<sup>+</sup>, 529.1530; Found 529.1531 and 551.1344 [M + Na]<sup>+</sup>.

**2-(9-(4-Chlorobenzyl)-9H-carbazol-3-yl)-N-(4-fluorophenyl)-2-oxoacetamide (14g).**

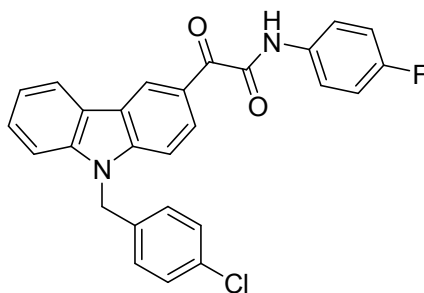

Yellow solid; Yield 75%; M.p: 202-203 °C; <sup>1</sup>H NMR (400 MHz, CDCl<sub>3</sub>) δ 9.43 (d, 1.5 Hz, 1H), 9.13 (s, 1H), 8.55 (dd, *J* = 8.8, 1.6 Hz, 1H), 8.22 (d, *J* = 7.7 Hz, 1H), 7.74–7.71 (m, 2H), 7.53–7.46 (m, 1H), 7.40–7.33 (m, 3H), 7.24 (s, 2H), 7.14–7.03 (m, 4H), 5.51 (s, 2H); <sup>13</sup>C NMR (101 MHz, CDCl<sub>3</sub>) δ 185.7, 159.9, 144.2, 141.2, 134.6, 133.7, 133.0, 133.0, 129.7, 129.2, 127.7, 127.0, 126.2, 124.9, 123.6, 123.1, 121.8, 121.7, 121.1, 116.1, 115.9, 113.4, 109.5, 108.8, 46.2; IR (KBr, ν, cm<sup>-1</sup>): 3310, 3055, 2935, 1690, 1651, 1589, 1535, 1497, 1381, 1335, 1265, 1211, 1142, 833, 705.

**2-(9-(4-Chlorobenzyl)-9H-carbazol-3-yl)-2-oxo-N-(pyridin-4-yl)acetamide (14h).**

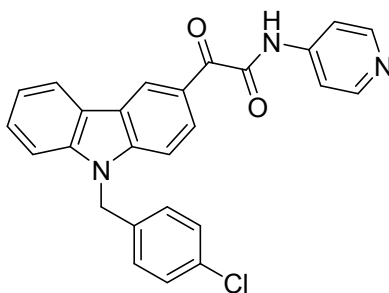

Yellow solid; Yield 91%; M.p: 116-118 °C; <sup>1</sup>H NMR (400 MHz, CDCl<sub>3</sub>) δ 9.40 (s, 1H), 9.32 (s, 1H), 8.61 (d, *J* = 5.0 Hz, 2H), 8.53 (dd, *J* = 8.8, 1.4 Hz, 1H), 8.22 (d, *J* = 7.5 Hz, 1H), 7.69 (d, *J* = 6.1 Hz, 2H), 7.50 (t, *J* = 7.4 Hz, 1H), 7.31–7.35 (m, 3H), 7.24 (t, *J* = 4.8 Hz, 2H), 7.06 (d, *J* = 8.3 Hz, 2H), 5.52 (s, 2H); <sup>13</sup>C NMR (101 MHz, CDCl<sub>3</sub>) δ 184.6, 160.5, 151.0, 144.4, 143.8, 141.2, 134.5, 133.8, 129.8, 129.2, 127.7, 127.2, 126.2, 124.5, 123.5, 123.3, 121.2, 121.1, 113.8, 109.6, 108.9, 46.3; IR (KBr, ν, cm<sup>-1</sup>): 3340, 2924, 1696, 1659, 1489, 1327, 1265, 1142, 1021, 803; Anal. RP-HPLC *t*<sub>R</sub> = 4.306 min, purity 98.02%; HRMS (ESI<sup>+</sup>) Calculated for C<sub>26</sub>H<sub>19</sub>ClN<sub>3</sub>O<sub>2</sub> [M + H]<sup>+</sup>, 440.1166; Found 440.1171 and 442.1141 [M + H + 2]<sup>+</sup>.

**2-(9-(4-Chlorobenzyl)-9H-carbazol-3-yl)-N-(4-(dimethylamino)phenyl)-2-oxoacetamide (14i).**

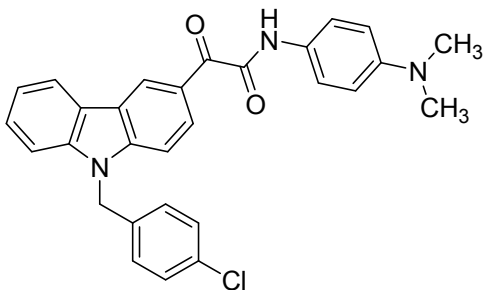

Yellow solid; Yield 71%; M.p: 211-213 °C; <sup>1</sup>H NMR (400 MHz, CDCl<sub>3</sub>) δ 9.46 (d, *J* = 1.3 Hz, 1H), 8.98 (s, 1H), 8.56 (dd, *J* = 8.8, 1.7 Hz, 1H), 8.24–8.21 (m, 1H), 7.63–7.60 (m, 2H), 7.50–7.46 (m, 1H), 7.42–7.30 (m, 4H), 7.24 (s, 1H), 7.06 (d, *J* = 8.6 Hz, 2H), 6.79–6.76 (m, 2H), 5.52 (s, 2H), 2.97 (s, 6H); IR (KBr, ν, cm<sup>-1</sup>): 3333, 3047, 2924, 2854, 2800, 1674, 1643, 1582, 1520, 1443, 1350, 1265, 1136, 1011, 949, 895, 825, 795, 748, 694, 617; HRMS (ESI<sup>+</sup>) Calculated for C<sub>29</sub>H<sub>25</sub>ClN<sub>3</sub>O<sub>2</sub> [M + H]<sup>+</sup>, 482.1635; Found 482.1621 and 484.1609 [M + H + 2]<sup>+</sup>.

**2-(9-(4-Chlorobenzyl)-9H-carbazol-3-yl)-2-oxo-N-(quinolin-6-yl)acetamide (14j).**

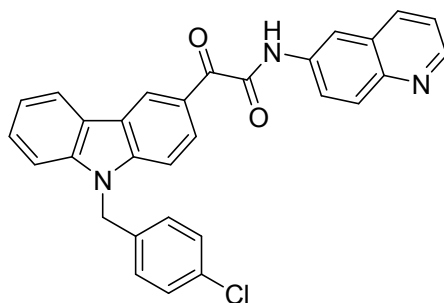

Yellow solid; Yield 70%; M.p: 129-131 °C; <sup>1</sup>H NMR (400 MHz, CDCl<sub>3</sub>) δ 9.44 (d, 1.3 Hz, 2H), 8.89 (dd, *J* = 4.3, 1.6 Hz, 1H), 8.61–8.55 (m, 2H), 8.25–8.18 (m, 2H), 8.16 (d, *J* = 9.0 Hz, 1H), 7.79 (dd, *J* = 9.0, 2.4 Hz, 1H), 7.52–7.41 (m, 2H), 7.41–7.30 (m, 3H), 7.23 (t, *J* = 2.1 Hz, 2H), 7.05 (d, *J* = 8.5 Hz, 2H), 5.49 (s, 2H); <sup>13</sup>C NMR (101 MHz, CDCl<sub>3</sub>) δ 185.4, 160.3, 149.5, 145.4, 144.3, 141.1, 136.4, 134.9, 134.5, 133.7, 130.2, 130.1, 129.8, 129.2, 128.8, 127.7, 127.1, 126.2, 124.8, 123.5, 123.4, 123.2, 121.9, 121.1, 116.5, 109.5, 108.8, 46.2; IR (KBr, ν, cm<sup>-1</sup>): 3356, 2932, 1690, 1651, 1597, 1528, 1504, 1450, 1412, 1373, 1335, 1296, 1250, 1126, 1011, 802; Anal. RP-HPLC t<sub>R</sub> = 4.911 min, purity 97.89%; HRMS (ESI<sup>+</sup>) Calculated for C<sub>30</sub>H<sub>21</sub>ClN<sub>3</sub>O<sub>2</sub> [M + H]<sup>+</sup>, 490.1322; Found 490.1327 and 492.1304 [M + H + 2]<sup>+</sup>.

**2-(9-(4-Chlorobenzyl)-9H-carbazol-3-yl)-N-(5-methylthiazol-2-yl)-2-oxoacetamide (14k).**

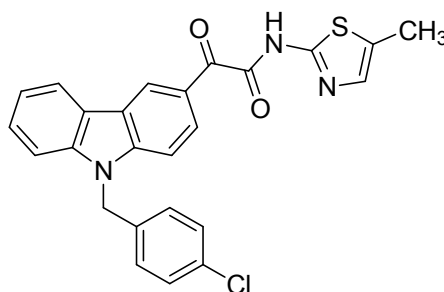

Yellow solid; Yield 74%; M.p: 178-179 °C. <sup>1</sup>H NMR (400 MHz, CDCl<sub>3</sub>) δ 10.63 (s, 1H), 9.48 (d, *J* = 1.3 Hz, 1H), 8.60 (dd, *J* = 8.8, 1.5 Hz, 1H), 8.25 (d, *J* = 8.2 Hz, 1H), 7.52 (t, *J* = 7.3 Hz, 1H), 7.46–7.32 (m, 4H), 7.26 (s, 1H), 7.08 (d, *J* = 8.3 Hz, 2H), 6.70 (s, 1H), 5.53 (s, 2H), 2.44 (s, 3H); <sup>13</sup>C NMR (101 MHz, CDCl<sub>3</sub>) δ 182.9, 159.3, 156.1, 148.4, 144.4, 141.2, 134.5, 133.8, 129.7, 129.2, 128.7, 127.7, 127.1, 126.2, 124.6, 123.5, 123.3, 121.2, 109.6, 109.2, 108.9, 46.3, 17.1; IR (KBr, ν, cm<sup>-1</sup>): 3317, 3055, 2932, 1690, 1651, 1589, 1528, 1489, 1257, 1142, 1011, 802; Anal. RP-HPLC t<sub>R</sub> = 4.562 min, purity 99.82%; HRMS (ESI<sup>+</sup>) Calculated for C<sub>25</sub>H<sub>19</sub>ClN<sub>3</sub>O<sub>2</sub>S [M + H]<sup>+</sup>, 460.0886; Found 460.0888.

**2-(9H-Carbazol-3-yl)-2-oxo-N-phenylacetamide (14l).**

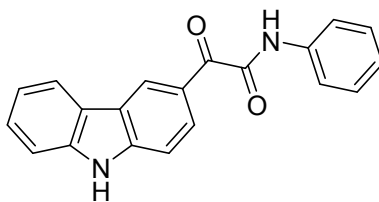

Yellow solid; Yield 70%; M.p: 221-222 °C;  $^1\text{H}$  NMR (400 MHz,  $\text{CDCl}_3$ )  $\delta$  9.41 (s, 1H), 9.12 (s, 1H), 8.55 (dd,  $J = 8.7, 1.5$  Hz, 1H), 8.43 (s, 1H), 8.18 (d,  $J = 7.7$  Hz, 1H), 7.76 (d,  $J = 7.7$  Hz, 2H), 7.53–7.46 (m, 3H), 7.43 (t,  $J = 7.9$  Hz, 2H), 7.36–7.30 (m, 1H), 7.21 (t,  $J = 7.4$  Hz, 1H);  $^{13}\text{C}$  NMR (101 MHz,  $\text{CDCl}_3$ )  $\delta$  187.4, 162.4, 143.9, 140.6, 137.5, 128.8, 128.3, 126.4, 125.1, 124.6, 124.0, 123.1, 122.8, 120.4, 120.2, 120.0, 111.4, 110.9; IR (KBr,  $\nu$ ,  $\text{cm}^{-1}$ ): 3348, 3055, 2932, 1674, 1651, 1589, 1528, 1443, 1335, 1296, 1265, 1257, 1165, 1134, 1011, 787, 748, 687, 602, 548; Anal. RP-HPLC  $t_{\text{R}} = 3.335$  min, purity 98.25%; HRMS (ESI $^+$ ) Calculated for  $\text{C}_{20}\text{H}_{15}\text{N}_2\text{O}_2$   $[\text{M} + \text{H}]^+$ , 315.1133; Found 315.1129 and 337.0949  $[\text{M} + \text{Na}]^+$ .

**2-(9H-Carbazol-3-yl)-2-oxo-N-(3,4,5-trimethoxyphenyl)acetamide (14m).**

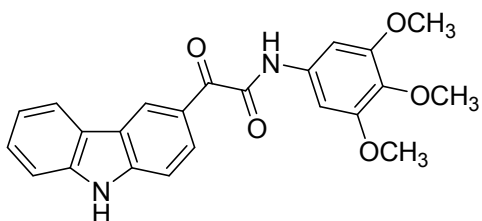

Yellow solid; Yield 72%; M.p: 207-208 °C;  $^1\text{H}$  NMR (400 MHz,  $\text{CDCl}_3$ )  $\delta$  9.39 (s, 1H), 9.08 (s, 1H), 8.55 (dd,  $J = 8.7, 1.7$  Hz, 1H), 8.47 (s, 1H), 8.19 (d,  $J = 7.8$  Hz, 1H), 7.51–7.45 (m, 3H), 7.35–7.31 (m, 1H), 7.07 (s, 2H), 3.93 (s, 6H), 3.86 (s, 3H);  $^{13}\text{C}$  NMR (101 MHz,  $\text{CDCl}_3$ )  $\delta$  185.9, 160.0, 153.5, 143.5, 140.0, 135.3, 133.1, 129.5, 126.9, 126.1, 124.9, 123.6, 123.3, 120.9, 120.8, 111.1, 110.6, 97.6, 61.0, 56.2; IR (KBr,  $\nu$ ,  $\text{cm}^{-1}$ ): 3340, 3301, 3055, 2932, 2839, 1690, 1651, 1597, 1528, 1458, 1412, 1373, 1335, 1234, 1203, 1126, 995, 802, 733, 617; Anal. RP-HPLC  $t_{\text{R}} = 3.113$  min, purity 98.72%; HRMS (ESI $^+$ ) Calculated for  $\text{C}_{23}\text{H}_{21}\text{N}_2\text{O}_5$   $[\text{M} + \text{H}]^+$ , 405.1450; Found 405.1451 and 427.1273  $[\text{M} + \text{Na}]^+$ .

**2-(9H-Carbazol-3-yl)-N-(3-methoxyphenyl)-2-oxoacetamide (14n).**

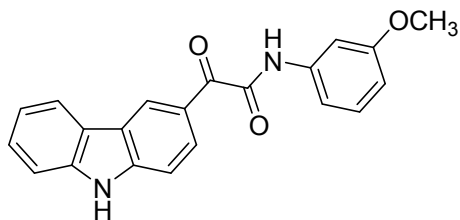

Yellow solid; Yield 72%; M.p: 171-173 °C; <sup>1</sup>H NMR (400 MHz, CDCl<sub>3</sub>) δ 9.40 (s, 1H), 9.10 (s, 1H), 8.55 (dd, *J* = 8.7, 1.4 Hz, 1H), 8.43 (s, 1H), 8.18 (d, *J* = 7.8 Hz, 1H), 7.49 (dd, *J* = 8.5, 3.8 Hz, 3H), 7.35–7.29 (m, 2H), 7.22 (d, *J* = 8.0 Hz, 1H), 6.77 (dd, *J* = 7.9, 1.8 Hz, 1H), 6.38–6.21 (m, 1H), 3.87 (s, 3H); IR (KBr, ν, cm<sup>-1</sup>): 3379, 3317, 3070, 2962, 2831, 1690, 1651, 1597, 1535, 1497, 1450, 1335, 1242, 1203, 1149, 1034, 795, 687; Anal. RP-HPLC *t*<sub>R</sub> = 3.251 min, purity 98.37%; HRMS (ESI<sup>+</sup>) Calculated for C<sub>21</sub>H<sub>17</sub>N<sub>2</sub>O<sub>3</sub> [M + H]<sup>+</sup>, 345.1239; Found 345.1237 and 367.1058 [M + Na]<sup>+</sup>

**2-(9H-Carbazol-3-yl)-N-(4-methoxyphenyl)-2-oxoacetamide (14o).**

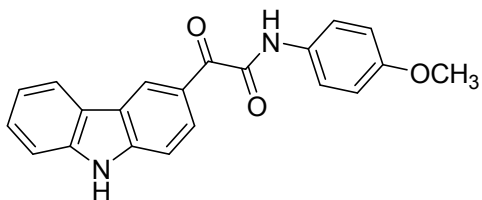

Yellow solid; Yield 70%; M.p: 199-201 °C; <sup>1</sup>H NMR (400 MHz, CDCl<sub>3</sub>) δ 9.41 (s, 1H), 9.04 (s, 1H), 8.54 (dd, *J* = 8.7, 1.7 Hz, 1H), 8.43 (s, 1H), 8.17 (d, *J* = 7.8 Hz, 1H), 7.71–7.67 (m, 1H), 7.67–7.65 (m, 1H), 7.48 (dd, *J* = 5.8, 2.1 Hz, 3H), 7.34–7.30 (m, 1H), 6.98–6.96 (m, 1H), 6.96–6.93 (m, 1H), 3.84 (s, 3H); IR (KBr, ν, cm<sup>-1</sup>): 3294, 3256, 3094, 2962, 2831, 1692, 1659, 1597, 1504, 1450, 1412, 1335, 1281, 1234, 1134, 1103, 1011, 802, 795, 679; Anal. RP-HPLC *t*<sub>R</sub> = 3.138 min, purity 99.62%; HRMS (ESI<sup>+</sup>) Calculated for C<sub>21</sub>H<sub>17</sub>N<sub>2</sub>O<sub>3</sub> [M + H]<sup>+</sup>, 345.1239; Found 345.1238 and 367.1059 [M + Na]<sup>+</sup>

**2-(9H-Carbazol-3-yl)-2-oxo-N-(pyridin-4-yl)acetamide (14p).**

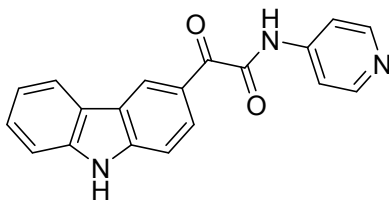

Yellow solid; Yield 71%; M.p >300 °C; <sup>1</sup>H NMR (400 MHz, DMSO-*d*<sub>6</sub>) δ 11.97 (s, 1H), 11.34 (s, 1H), 8.91 (d, *J* = 1.4 Hz, 1H), 8.56 (d, *J* = 6.0 Hz, 2H), 8.31 (d, *J* = 7.8 Hz, 1H), 8.10 (dd, *J* =

8.6, 1.7 Hz, 1H), 7.78 (d,  $J = 6.3$  Hz, 2H), 7.66 (d,  $J = 8.6$  Hz, 1H), 7.59 (d,  $J = 8.1$  Hz, 1H), 7.49 (t,  $J = 8.2$  Hz, 1H), 7.27 (t,  $J = 7.9$  Hz, 1H);  $^{13}\text{C}$  NMR (101 MHz, DMSO- $d_6$ )  $\delta$  188.6, 165.8, 151.1, 145.2, 144.2, 141.0, 128.1, 127.3, 124.7, 123.6, 123.0, 123.0, 121.5, 120.6, 114.6, 112.2, 112.0; IR (KBr,  $\nu$ ,  $\text{cm}^{-1}$ ): 3286, 3217, 3094, 2962, 2800, 1705, 1659, 1605, 1566, 1489, 1420, 1342, 1311, 1250, 1196, 1157, 1126, 1011, 802, 787, 748, 679; Anal. RP-HPLC  $t_{\text{R}} = 3.133$  min, purity 98.12%; HRMS (ESI $^{+}$ ) Calculated for  $\text{C}_{19}\text{H}_{14}\text{N}_3\text{O}_2$   $[\text{M} + \text{H}]^{+}$ , 316.1086; Found 316.1085.

**2-(9H-Carbazol-3-yl)-N-(3,4-dimethoxyphenyl)-2-oxoacetamide (14q).**

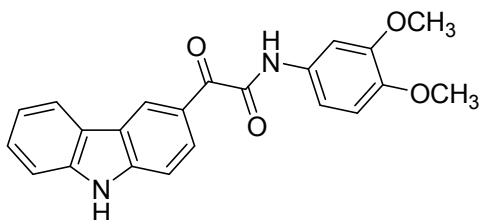

Yellow solid; Yield 71%; M.p: 202-203 °C;  $^1\text{H}$  NMR (400 MHz,  $\text{CDCl}_3$ )  $\delta$  9.41 (s, 1H), 9.07 (s, 1H), 8.55 (dd,  $J = 8.7, 1.7$  Hz, 1H), 8.43 (s, 1H), 8.18 (d,  $J = 7.8$  Hz, 1H), 7.56 (d,  $J = 2.4$  Hz, 1H), 7.51–7.45 (m, 3H), 7.35–7.31 (m, 1H), 7.16 (dd,  $J = 8.6, 2.4$  Hz, 1H), 6.90 (d,  $J = 8.6$  Hz, 1H), 3.96 (s, 3H), 3.91 (s, 3H);  $^{13}\text{C}$  NMR (101 MHz,  $\text{CDCl}_3$ )  $\delta$  186.0, 159.7, 149.2, 146.5, 143.4, 139.9, 130.6, 129.6, 126.9, 126.1, 125.1, 123.6, 123.3, 120.9, 120.9, 112.1, 111.4, 111.1, 110.5, 104.4, 56.1, 56.0; IR (KBr,  $\nu$ ,  $\text{cm}^{-1}$ ): 3472, 3286, 3086, 2924, 2839, 1692, 1659, 1589, 1450, 1335, 1219, 1134, 1018, 849, 795, 733, 671, 617; Anal. RP-HPLC  $t_{\text{R}} = 2.996$  min, purity 98.66%; HRMS (ESI $^{+}$ ) Calculated for  $\text{C}_{22}\text{H}_{19}\text{N}_2\text{O}_4$   $[\text{M} + \text{H}]^{+}$ , 375.1344; Found 375.1348 and 397.1164  $[\text{M} + \text{Na}]^{+}$ .

**2-(9-Methyl-9H-carbazol-3-yl)-2-oxo-N-phenylacetamide (14r)**

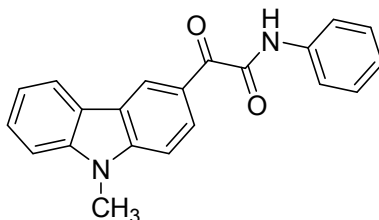

Yellow solid; Yield 78%; M.p: 165-166 °C;  $^1\text{H}$  NMR (400 MHz,  $\text{CDCl}_3$ )  $\delta$  9.40 (d,  $J = 1.4$  Hz, 1H), 9.18 (s, 1H), 8.60 (dd,  $J = 8.8, 1.7$  Hz, 1H), 8.19 (d,  $J = 7.7$  Hz, 1H), 7.79 (d,  $J = 7.6$  Hz, 2H), 7.56 (t,  $J = 8.2$  Hz, 1H), 7.47–7.41 (m, 4H), 7.35 (t,  $J = 7.9$  Hz, 1H), 7.23 (t,  $J = 7.4$  Hz, 1H), 3.87 (s, 3H);  $^{13}\text{C}$  NMR (101 MHz,  $\text{CDCl}_3$ )  $\delta$  185.8, 160.2, 144.6, 141.7, 136.9, 129.5,

129.2, 126.7, 126.0, 125.1, 124.4, 123.3, 122.7, 120.8, 120.6, 120.0, 109.1, 108.4, 29.4; IR (KBr,  $\nu$ ,  $\text{cm}^{-1}$ ): 3333, 2924, 2854, 1682, 1643, 1610, 1528, 1443, 1366, 1304, 1257, 1149, 1026, 895; Anal. RP-HPLC  $t_R$  = 3.461 min, purity 98.76%; MS (ESI<sup>+</sup>) Calculated for  $\text{C}_{21}\text{H}_{17}\text{N}_2\text{O}_2$   $[\text{M} + \text{H}]^+$ , 329.12; Found 329.12.

**2-(9-Methyl-9H-carbazol-3-yl)-2-oxo-N-(3,4,5-trimethoxyphenyl)acetamide (14s)**

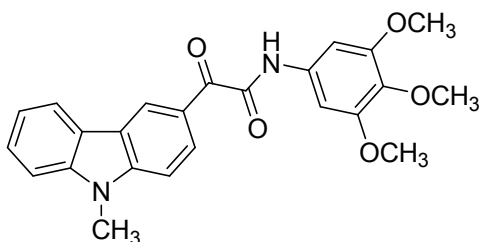

Yellow solid; Yield 80%; M.p: 187-188 °C; <sup>1</sup>H NMR (400 MHz,  $\text{CDCl}_3$ )  $\delta$  9.35 (d,  $J$  = 1.6 Hz, 1H), 9.17 (s, 1H), 8.57 (dd,  $J$  = 8.8, 1.6 Hz, 1H), 8.18 (d,  $J$  = 7.7 Hz, 1H), 7.54 (t,  $J$  = 8.2 Hz, 1H), 7.43–7.38(m, 2H), 7.34 (t,  $J$  = 7.2 Hz, 1H), 7.08 (s, 2H), 3.92 (s, 6H), 3.88 (s, 3H), 3.84 (s, 3H); <sup>13</sup>C NMR (101 MHz,  $\text{CDCl}_3$ )  $\delta$  185.7, 160.1, 153.4, 144.5, 141.6, 135.2, 133.1, 129.4, 126.7, 125.9, 124.3, 123.2, 122.7, 120.8, 120.5, 109.1, 108.4, 97.5, 61.0, 56.2, 29.3; IR (KBr,  $\nu$ ,  $\text{cm}^{-1}$ ): 3310, 2924, 2854, 1683, 1659, 1607, 1589, 1504, 1450, 1373, 1327, 1227, 1126, 895; Anal. RP-HPLC  $t_R$  = 2.837 min, purity 99.34%; MS (ESI<sup>+</sup>) Calculated for  $\text{C}_{24}\text{H}_{23}\text{N}_2\text{O}_5$   $[\text{M} + \text{H}]^+$ , 419.16; Found 419.18.

**2-(9-Ethyl-9H-carbazol-3-yl)-2-oxo-N-phenylacetamide (14t)**

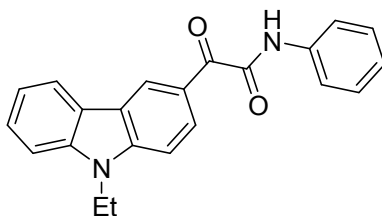

Yellow solid; Yield 82%; M.p 159-160 °C; <sup>1</sup>H NMR (400 MHz,  $\text{CDCl}_3$ )  $\delta$  9.44 (d,  $J$  = 1.3 Hz, 1H), 9.18 (s, 1H), 8.62 (dd,  $J$  = 8.8, 1.7 Hz, 1H), 8.22 (d,  $J$  = 7.7 Hz, 1H), 7.79 (d,  $J$  = 7.6 Hz, 2H), 7.59–7.53 (m, 1H), 7.49–7.43 (m, 4H), 7.35 (t,  $J$  = 7.4 Hz, 1H), 7.26–7.21 (m, 1H), 4.42 (q,  $J$  = 7.2 Hz, 2H), 1.50 (t,  $J$  = 7.3 Hz, 3H); <sup>13</sup>C NMR (101 MHz,  $\text{CDCl}_3$ )  $\delta$  185.8, 160.2, 143.7, 140.7, 136.9, 129.5, 129.2, 126.6, 126.2, 125.1, 124.3, 123.5, 122.9, 121.0, 120.5, 119.9, 109.1,



108.4, 37.9, 13.8; IR (KBr,  $\nu$ ,  $\text{cm}^{-1}$ ): 3310, 2924, 2854, 1690, 1643, 1589, 1535, 1497, 1443, 1381, 1335, 1257, 1149, 756; Anal. RP-HPLC  $t_R$  = 2.870 min, purity 98.74%; MS (ESI<sup>+</sup>) Calculated for  $\text{C}_{22}\text{H}_{19}\text{N}_2\text{O}_2$   $[\text{M} + \text{H}]^+$ , 343.14; Found 343.19.

***N*-(3,4-Dimethoxyphenyl)-2-(9-ethyl-9*H*-carbazol-3-yl)-2-oxoacetamide (14u)**

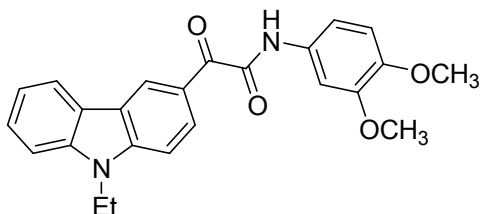

Yellow solid; Yield 85%; M.p: 110-111 °C; <sup>1</sup>H NMR (400 MHz,  $\text{CDCl}_3$ )  $\delta$  9.41 (d,  $J$  = 1.4 Hz, 1H), 9.15 (s, 1H), 8.60 (dd,  $J$  = 8.8, 1.6 Hz, 1H), 8.20 (d,  $J$  = 7.7 Hz, 1H), 7.58 (d,  $J$  = 2.4 Hz, 1H), 7.54 (t,  $J$  = 7.2 Hz, 1H), 7.44 (t,  $J$  = 8.6 Hz, 2H), 7.34 (t,  $J$  = 7.4 Hz, 1H), 7.18 (dd,  $J$  = 8.6, 2.4 Hz, 1H), 6.90 (d,  $J$  = 8.7 Hz, 1H), 4.39 (q,  $J$  = 7.2 Hz, 2H), 3.98 (s, 3H), 3.92 (s, 3H), 1.47 (t,  $J$  = 7.2 Hz, 3H); <sup>13</sup>C NMR (101 MHz,  $\text{CDCl}_3$ )  $\delta$  185.9, 160.0, 149.2, 146.4, 143.6, 140.6, 130.6, 129.4, 126.6, 126.1, 124.4, 123.5, 122.9, 121.0, 120.4, 112.0, 111.3, 109.1, 108.3, 104.4, 56.0, 37.9, 13.8; IR (KBr,  $\nu$ ,  $\text{cm}^{-1}$ ): 3338, 2924, 2854, 1724, 1659, 1589, 1443, 1381, 1327, 1250, 1142, 1026, 768; Anal. RP-HPLC  $t_R$  = 2.849 min, purity 99.51%; MS (ESI<sup>+</sup>) Calculated for  $\text{C}_{24}\text{H}_{23}\text{N}_2\text{O}_4$   $[\text{M} + \text{H}]^+$ , 403.16; Found 403.21.

**2-(9-Ethyl-9*H*-carbazol-3-yl)-2-oxo-*N*-(3,4,5-trimethoxyphenyl)acetamide (14v)**

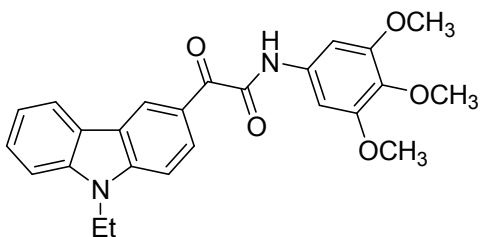

Yellow solid; Yield 86%; M.p: 175-176 °C; <sup>1</sup>H NMR (400 MHz,  $\text{CDCl}_3$ )  $\delta$  9.39 (d,  $J$  = 1.4 Hz, 1H), 9.18 (s, 1H), 8.59 (dd,  $J$  = 8.8, 1.6 Hz, 1H), 8.20 (d,  $J$  = 7.7 Hz, 1H), 7.54 (t,  $J$  = 7.7 Hz, 1H), 7.47–7.41 (m, 2H), 7.34 (t,  $J$  = 7.7 Hz, 1H), 7.10 (s, 2H), 4.38 (q,  $J$  = 7.2 Hz, 2H), 3.93 (s, 6H), 3.88 (s, 3H), 1.47 (t,  $J$  = 7.2 Hz, 3H); <sup>13</sup>C NMR (101 MHz,  $\text{CDCl}_3$ )  $\delta$  185.7, 160.1, 153.5, 143.6, 140.6, 135.2, 133.1, 129.4, 126.6, 126.0, 124.2, 123.4, 122.9, 121.0, 120.5, 109.1, 108.3,

97.6, 61.0, 56.2, 37.9, 13.8; IR (KBr,  $\nu$ ,  $\text{cm}^{-1}$ ): 3279, 2932, 2854, 1736, 1659, 1607, 1589, 1504, 1450, 1389, 1342, 1234, 1126, 1049, 995; Anal. RP-HPLC  $t_R$  = 2.866 min, purity 98.57%; MS (ESI<sup>+</sup>) Calculated for  $\text{C}_{25}\text{H}_{25}\text{N}_2\text{O}_5$   $[\text{M} + \text{H}]^+$ , 433.17; Found 433.18.

***N*-(4-(dimethylamino)phenyl)-2-(9-ethyl-9H-carbazol-3-yl)-2-oxoacetamide (14w)**

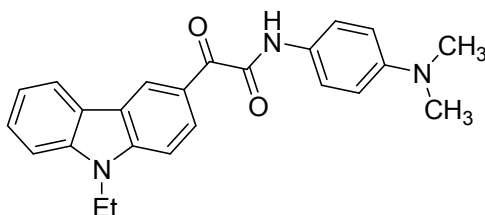

Yellow solid; Yield 73%; M.p: 173-174 °C; <sup>1</sup>H NMR (400 MHz,  $\text{CDCl}_3$ )  $\delta$  9.45 (d,  $J$  = 1.3 Hz, 1H), 9.04 (s, 1H), 8.63 (dd,  $J$  = 8.8, 1.6 Hz, 1H), 8.21 (d,  $J$  = 7.7 Hz, 1H), 7.65 (d,  $J$  = 9.0 Hz, 2H), 7.55 (t,  $J$  = 7.6 Hz, 1H), 7.49–7.43 (m, 2H), 7.34 (t,  $J$  = 7.0 Hz, 1H), 6.80 (d,  $J$  = 9.0 Hz, 2H), 4.41 (q,  $J$  = 7.2 Hz, 2H), 2.99 (s, 6H), 1.49 (t,  $J$  = 7.2 Hz, 3H); <sup>13</sup>C NMR (101 MHz,  $\text{CDCl}_3$ )  $\delta$  186.3, 159.8, 148.3, 143.6, 140.6, 129.5, 126.7, 126.6, 126.1, 124.7, 123.6, 122.8, 121.4, 121.0, 120.4, 112.9, 109.1, 108.3, 40.8, 37.9, 13.8; IR (KBr,  $\nu$ ,  $\text{cm}^{-1}$ ): 3290, 2924, 2854, 1723, 1666, 1582, 1448, 1350, 1234, 1126, 1065, 895; Anal. RP-HPLC  $t_R$  = 2.862 min, purity 99.71%; MS (ESI<sup>+</sup>) Calculated for  $\text{C}_{24}\text{H}_{24}\text{N}_3\text{O}_2$   $[\text{M} + \text{H}]^+$ , 386.18; Found 386.24.

**2-(9-Ethyl-9H-carbazol-3-yl)-2-oxo-*N*-(quinolin-6-yl)acetamide (14x)**

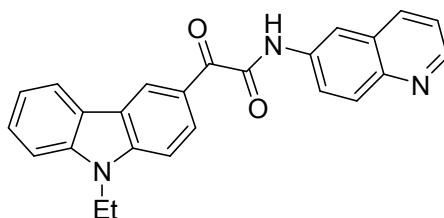

Yellow solid; Yield 78%; M.p: 191-192 °C; <sup>1</sup>H NMR (400 MHz,  $\text{CDCl}_3$ )  $\delta$  9.49 (s, 1H), 9.42 (d,  $J$  = 1.3 Hz, 1H), 8.89 (dd,  $J$  = 4.2, 1.7 Hz, 1H), 8.64–8.56 (m, 2H), 8.19 (t,  $J$  = 7.1 Hz, 2H), 8.14 (d,  $J$  = 8.0 Hz, 1H), 7.80 (dd,  $J$  = 9.0, 2.4 Hz, 1H), 7.57–7.52 (m, 1H), 7.47–7.40 (m, 3H), 7.34 (t,  $J$  = 7.5 Hz, 1H), 4.37 (q,  $J$  = 7.2 Hz, 2H), 1.47 (t,  $J$  = 7.3 Hz, 3H); <sup>13</sup>C NMR (101 MHz,  $\text{CDCl}_3$ )  $\delta$  185.3, 160.5, 149.8, 145.8, 143.7, 140.6, 136.0, 134.9, 130.5, 129.5, 128.8, 126.7, 126.2, 124.2, 123.4, 123.2, 122.9, 121.8, 121.0, 120.6, 116.5, 109.2, 108.4, 37.9, 13.8; IR (KBr,  $\nu$ ,  $\text{cm}^{-1}$ ): 3348, 2924, 2854, 1690, 1651, 1582, 1466, 1327, 1234, 1126, 1065, 887; Anal. RP-

HPLC  $t_R$  = 2.852 min, purity 98.11%; MS (ESI<sup>+</sup>) Calculated for C<sub>25</sub>H<sub>20</sub>N<sub>3</sub>O<sub>2</sub> [M + H]<sup>+</sup>, 394.15; Found 394.16.

### III. Cytotoxicity assay

**Cell culture.** U937 (Histiocytic lymphoma), and breast (MCF-7 and MDA-MB-231) cancer cell lines were cultured in DMEM supplemented with 10% fetal bovine serum and 50 µg/mL of streptomycin and penicillin. Jurkat (Human T lymphocyte) cell were cultured in RPMI supplemented with 10% fetal bovine serum and 50 µg/mL of streptomycin and penicillin. All the cell lines were maintained in 5% CO<sub>2</sub> environment at 37 °C.

**Cell viability assay.** Cells were seeded in a 96-well plate at a density of 100,000/mL and grown for overnight. Cells were treated with various carbazolyl glyoxamides at a final concentration of 10 µM and incubated for 48 h. Cell viability assay was performed using a MTT cell proliferation kit from ATCC (#30-1010K). In summary, 10 µL MTT reagent was added to each well, and cells were placed back in incubator for 4 h. 100 µL of detergent (from kit) was added and absorbance data was collected at 570 nm using Biotek synergy 2 spectrophotometer. Percentage of cell survival data was calculated using the following formula;

$$\% \text{ cell survival} = (100/A_t * A_s)$$

Where  $A_t$  and  $A_s$  are the absorbances of wells treated with test compounds and solvent control respectively.

**Caspase assay.** 1,00,000 cells were plated in a 24 well plate and treated with 1 µM compounds **14i-m** and **14q** for 24 h later, sample (100 µL) was taken and analyzed as per kit (Promega G7790). Fluorescence for the samples was measured at 0 min and 180 min. Camptothecin was used as a positive control for inducing apoptotic cell death.

### IV. Antibacterial activity

All the synthesized carbazolyl glyoxamides **14a-x** were screened for antibacterial activity against the Gram-negative bacteria *Escherichia coli* (MTCC 1652), *Pseudomonas putida* (MTCC 102) and Gram-positive bacteria *Staphylococcus aureus* (MTCC 96) and *Bacillus subtilis* (MTCC 121). The minimal inhibitory concentrations (MIC) and Zone of inhibition (ZOI) of the compounds were determined *in vitro* by the modified microbroth dilution method as per defined

by the National Committee for Clinical Laboratory Standards (1993). Bacterial culture were grown in Mueller–Hinton broth (Himedia Laboratories, India) medium and bacterial suspension was adjusted to  $1 \times 10^5$  CFU/mL. All compounds were dissolved in dimethylsulfoxide (DMSO) and two fold serial dilution of each compound was prepared to obtain the required concentrations of 256, 128, 64, 32, 16, 8, 4, 2, 1, 0.5  $\mu\text{g/mL}$ . Serial diluted test samples of each compound (75  $\mu\text{L}$ ) were added in 96 well micro-trays. The same amount of test microorganism was added to micro-trays well under aseptic condition to obtain a final volume of 150  $\mu\text{L}$  and incubated at 37  $^\circ\text{C}$  for 24 h. MIC value is defined as the lowest concentration of compound that inhibit the visible growth of bacteria. A control test with solvent DMSO at the same dilution was also performed to ensure that the solvent had no effect on bacterial growth. All assays were performed in duplicate sets. A broad spectrum antibiotic ‘chloramphenicol’ effective against Gram-positive and Gram-negative bacterium was used as positive control.

#### **Cell viability assay**

The effect of selected compounds on bactericidal activity was evaluated by quantifying bacterial cell number at different time intervals after treating with different concentrations of selected compounds. The time kill curve was determined for compounds against log phase ( $1 \times 10^5$  CFU/mL) freshly grown cultures of *E. coli* and *P. putida*. Bacterial cultures were treated with compound at different concentration (4, 8, 12 and 16  $\mu\text{g mL}^{-1}$ ) from 2-8 h and the percentage in reduction of bacterial cell viability was measured by standard plate count assay. The number of cells in the control was assumed to be 100%. The decrease in cellular viability in treated samples was calculated with respect to the control. All treatments were performed in triplicate sets.

#### **LDH assay**

50,000 Cells per 100 microliter were plated per well in a 96-well format and were treated with 20 micro molar doxorubicin and test compound. After 40 h, samples were processed and analyzed for LDH activity using LDH cytotoxicity kit from Cayman chemicals (cat no 601170).

### **V. References**

- 1 B. P. Bandgar, L. K. Adsul, S. V. Lonikar, H. V. Chavan, S. N. Shringare, S. A. Patil, S. S. Jalde, B. A. Koti, N. A. Dhole and R. N. Gacche, *J. Enzyme Inhib. Med. Chem.*, 2013, **28**, 593.
- 2 G. Bai, J. Li, D. Li, C. Dong, X. Han and P. Lin, *Dyes Pigments*, 2007, **75**, 93.

## VI. $^1\text{H}$ , $^{13}\text{C}$ and MS Spectra and HPLC traces of final compounds

**11a**

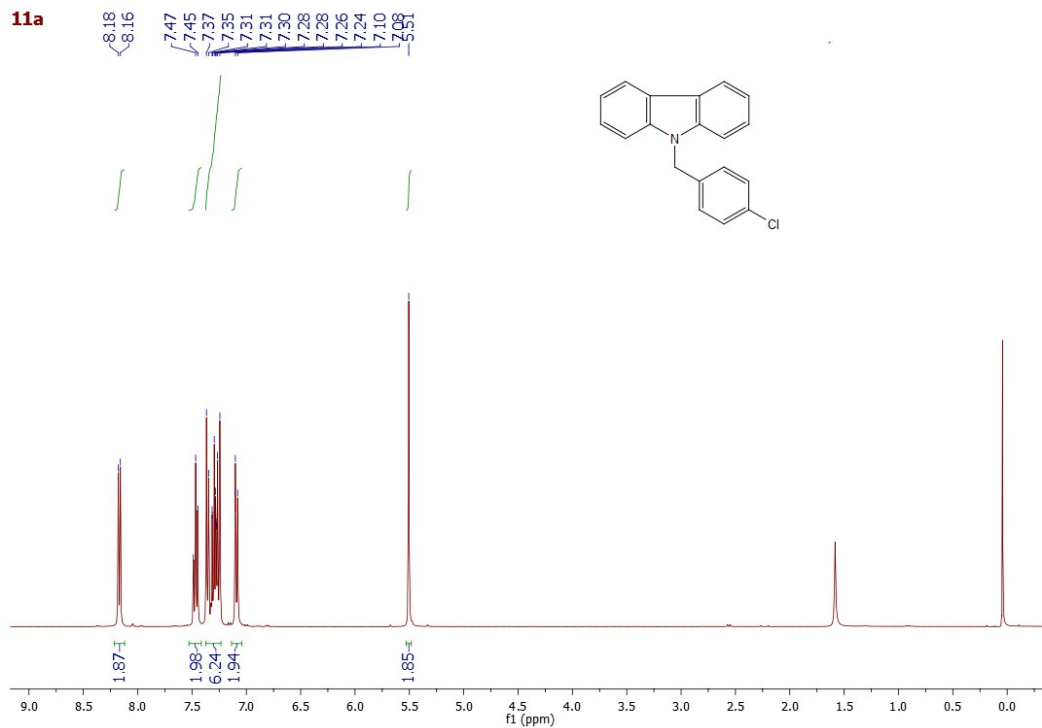

**12b**

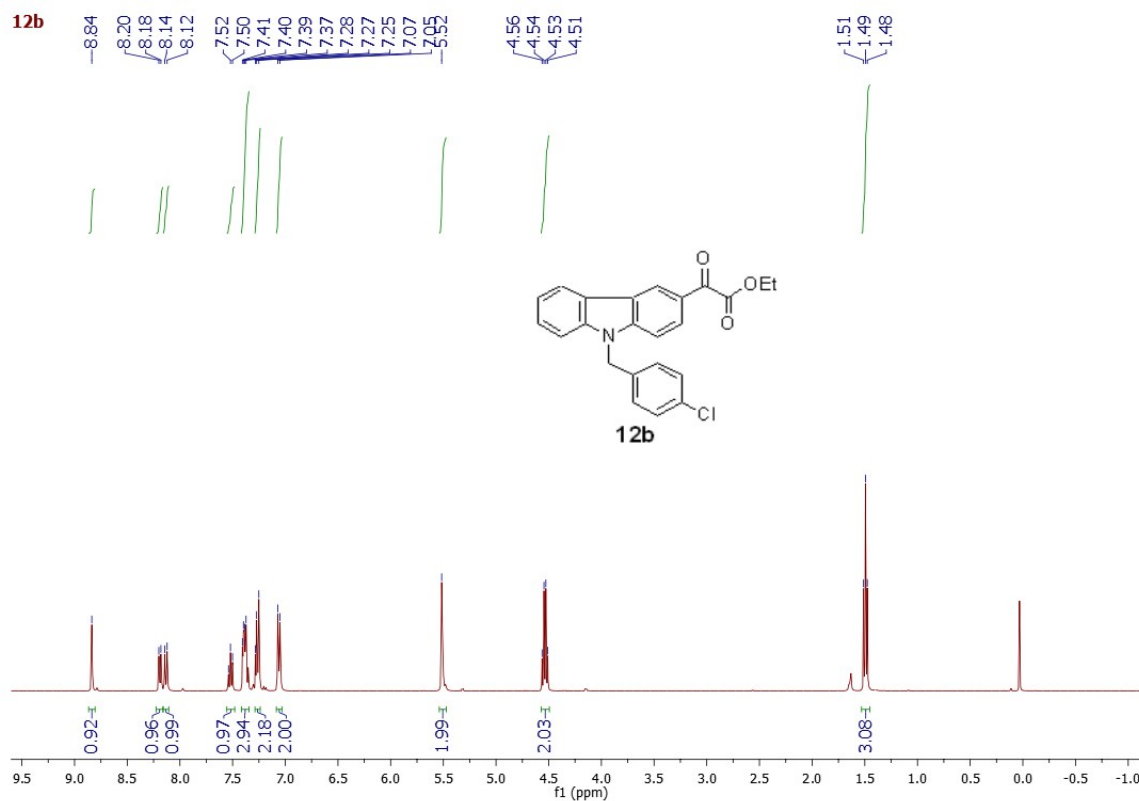

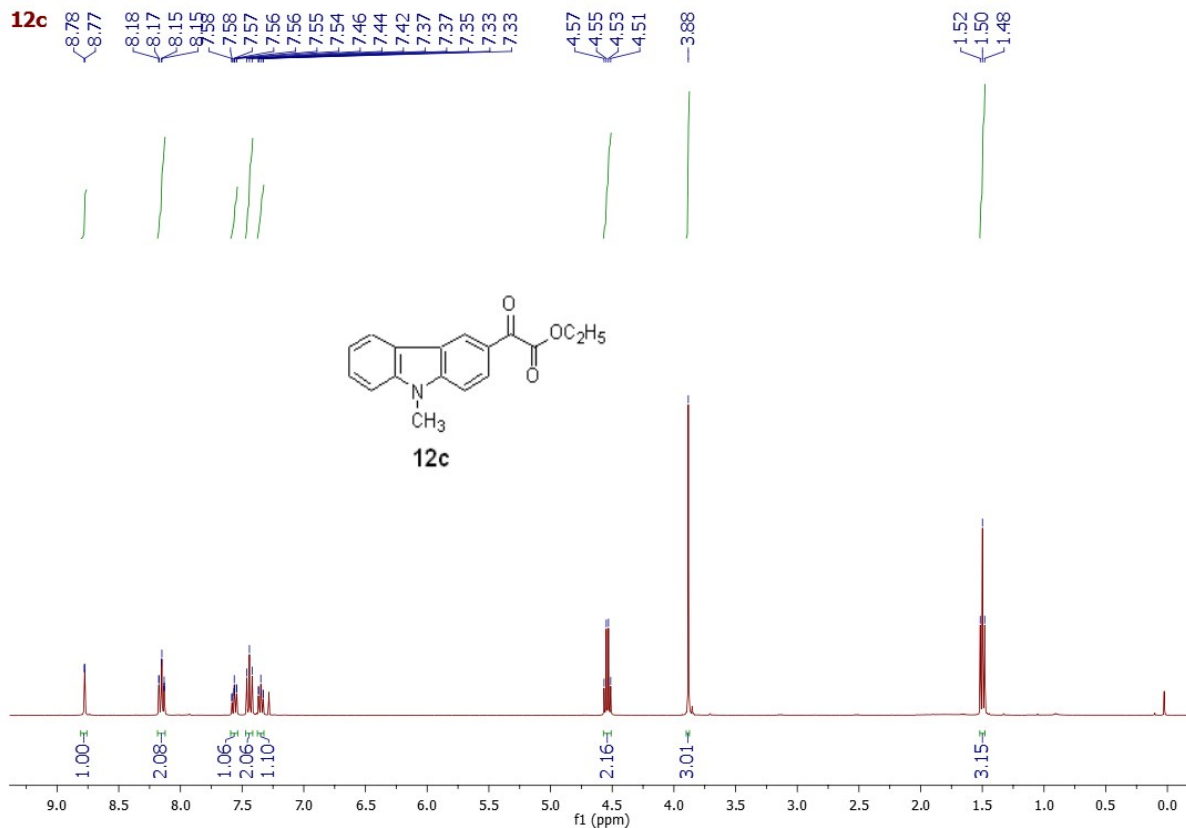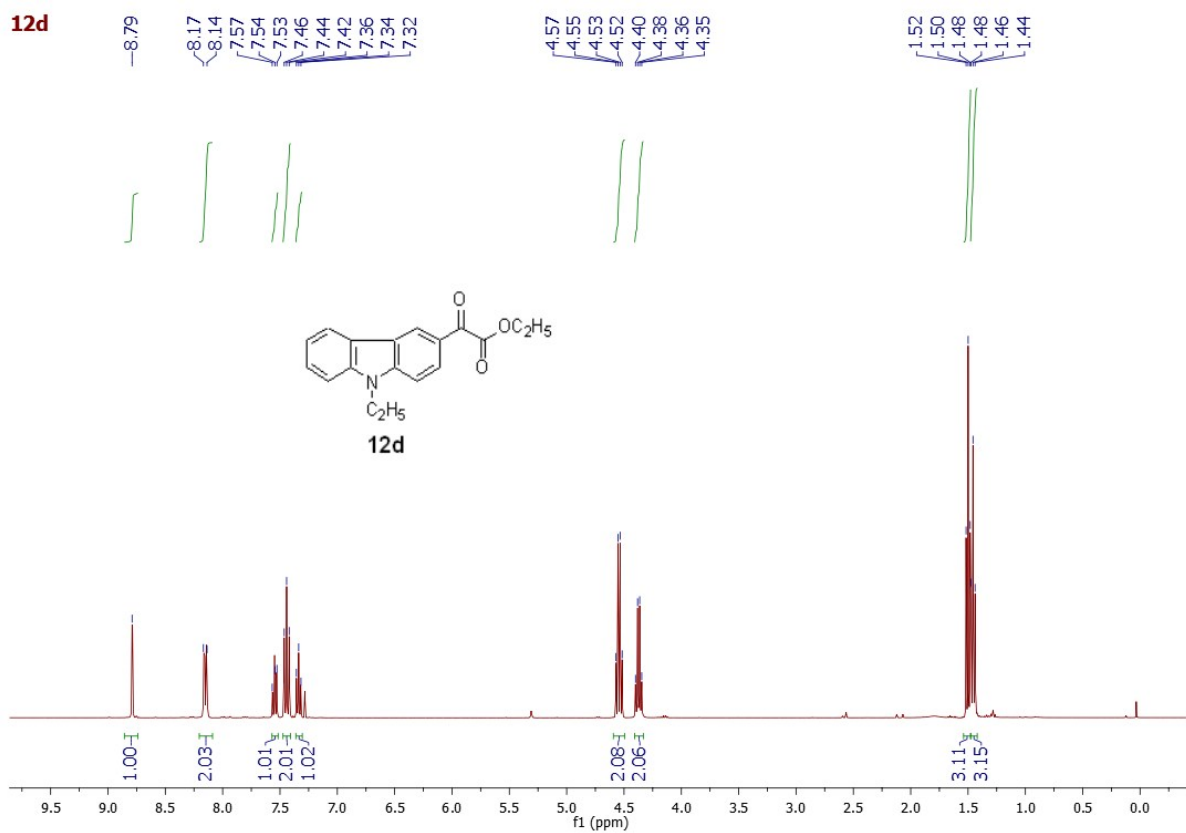

13b

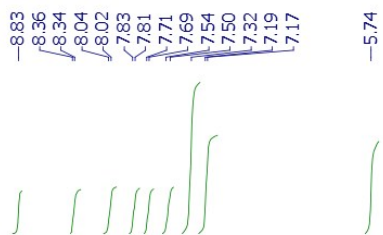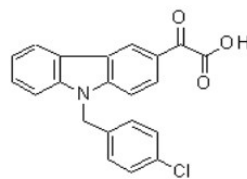

13b

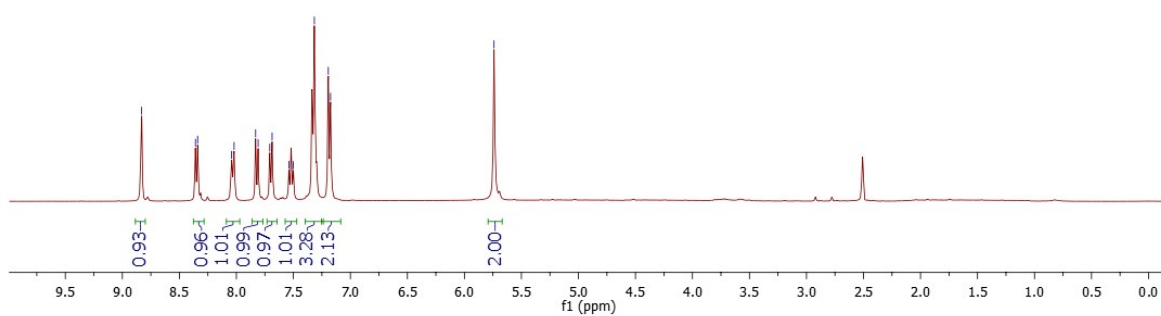

13b

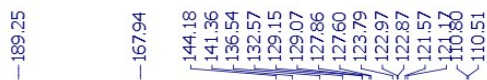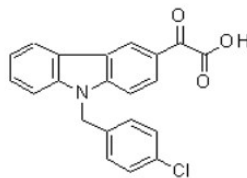

13b

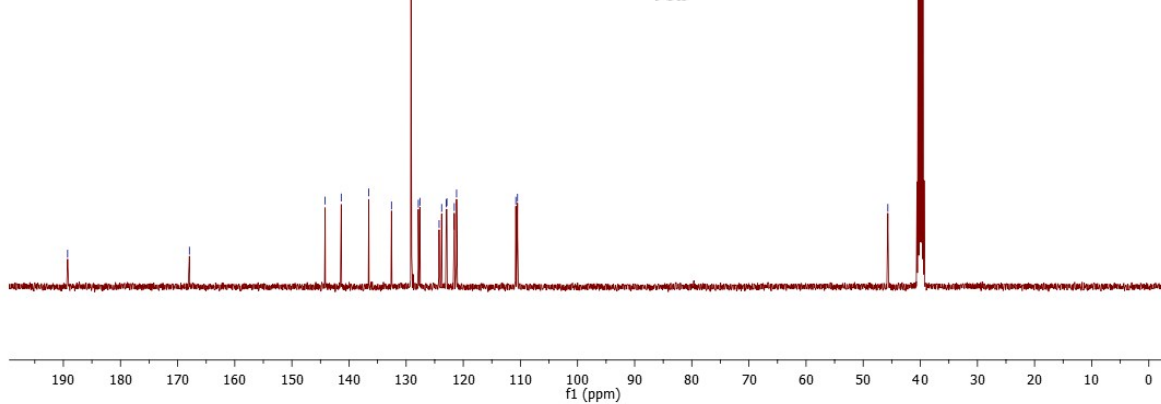

14a

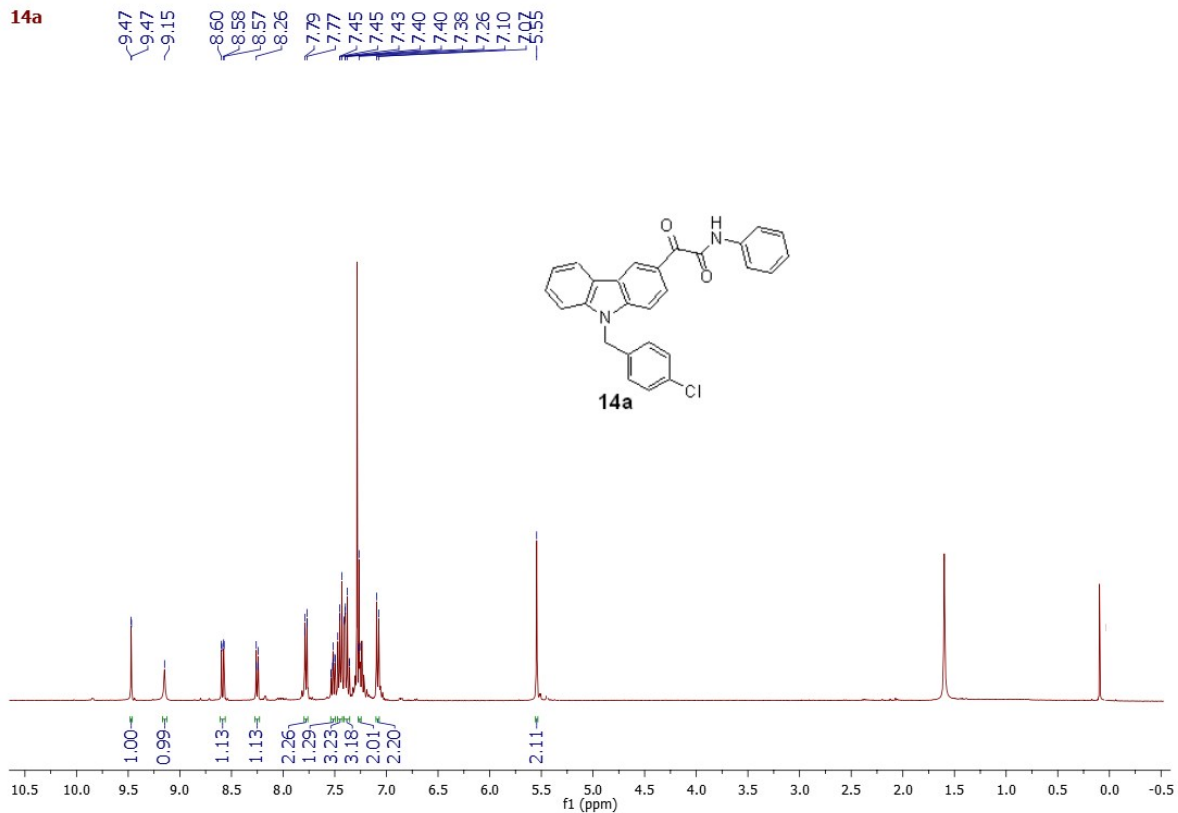

14a

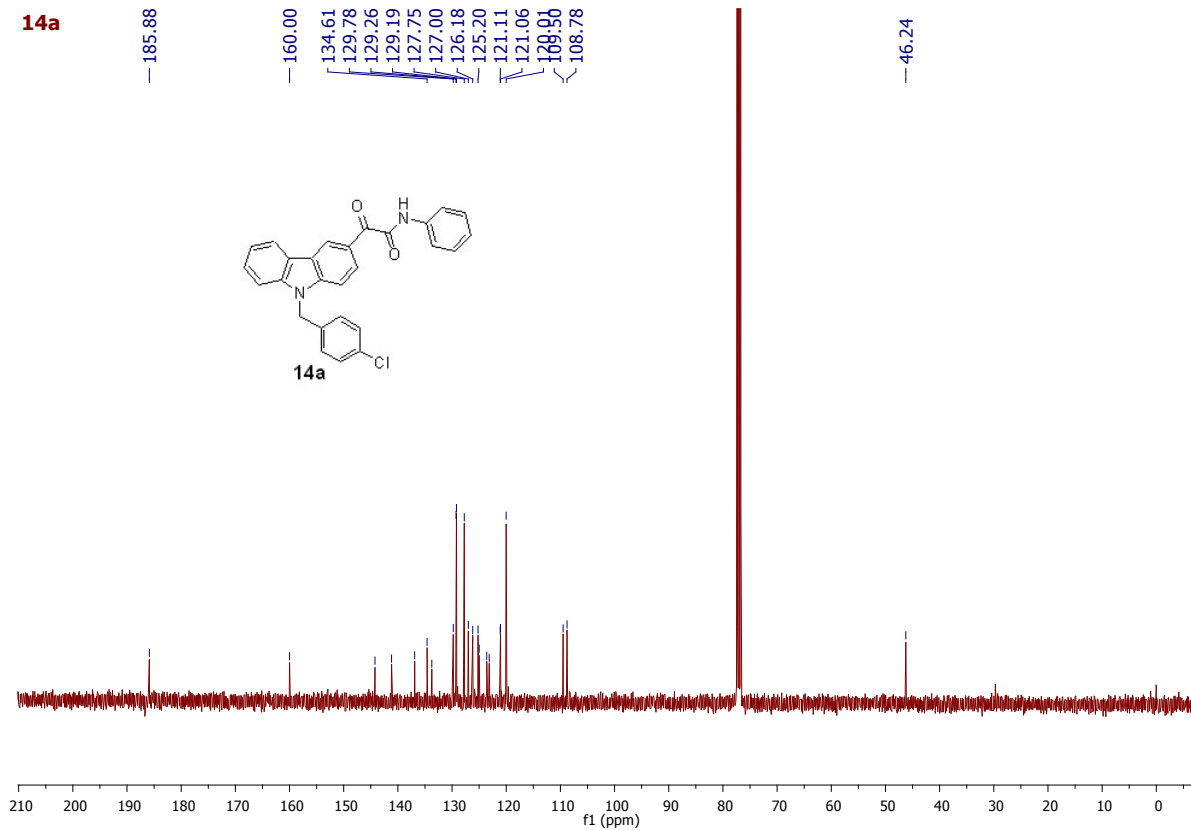



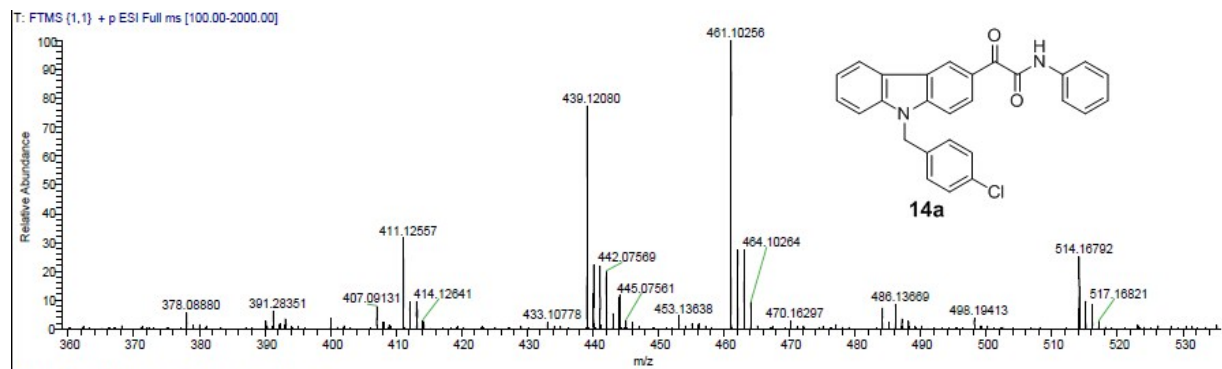

ARP-1#8-30 RT: 0.03-0.11 AV: 23  
T: FTMS {1,1} + p ESI Full ms [100.00-2000.00]  
m/z = 435.34-444.29

| m/z       | Intensity | Relative | Theo. Mass | Delta (ppm) | RDB equiv. | Composition                                                      |
|-----------|-----------|----------|------------|-------------|------------|------------------------------------------------------------------|
| 439.12103 | 267402.9  | 100.00   | 439.12078  | 0.56        | 18.5       | C <sub>27</sub> H <sub>20</sub> O <sub>2</sub> N <sub>2</sub> Cl |

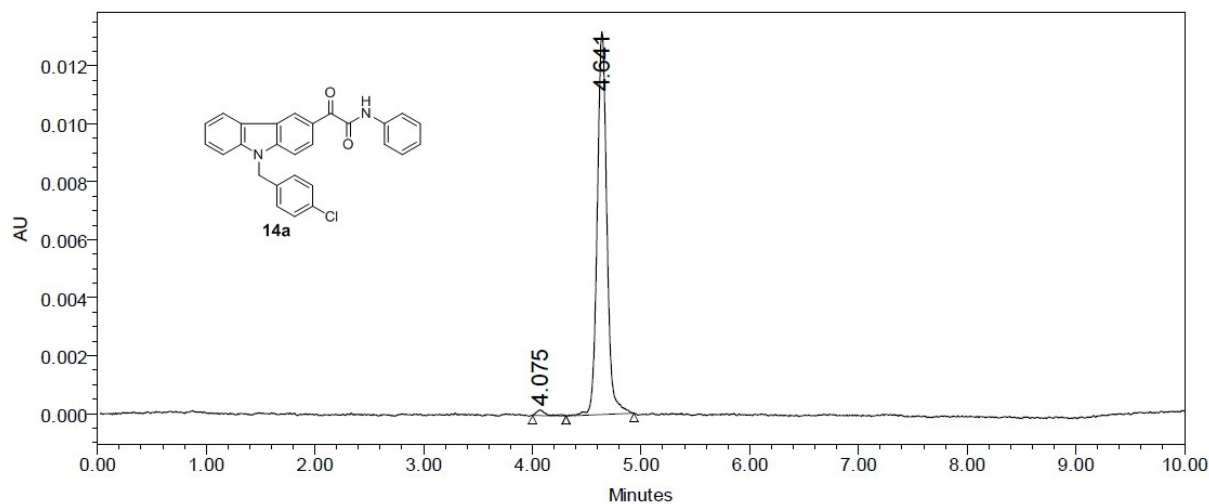

Channel: 2998; Processed Channel: PDA 350.0 nm; Result Id: 3865; Processing Method: cga1

**Processed Channel Descr.: PDA  
350.0 nm**

|   | Processed Channel Descr. | RT    | Area  | % Area | Height |
|---|--------------------------|-------|-------|--------|--------|
| 1 | PDA 350.0 nm             | 4.075 | 1194  | 1.45   | 194    |
| 2 | PDA 350.0 nm             | 4.641 | 81123 | 98.55  | 13204  |

14b

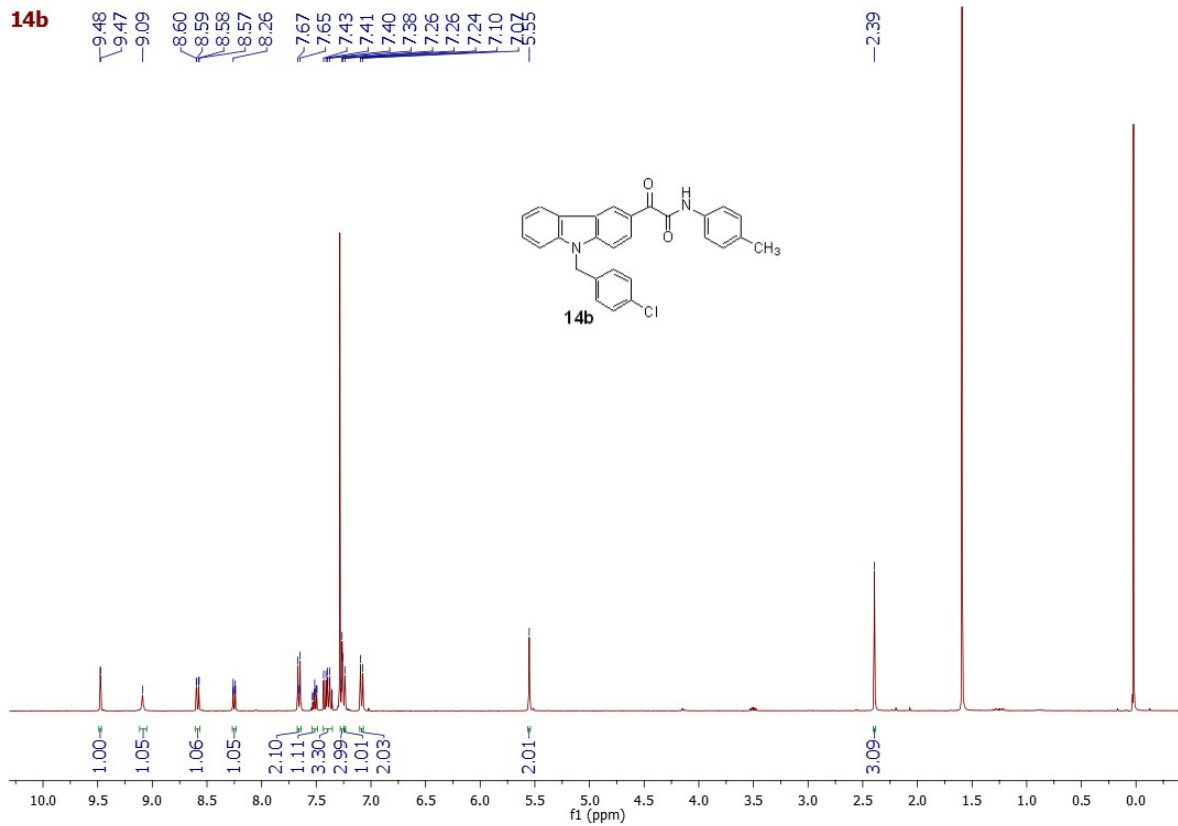

14b

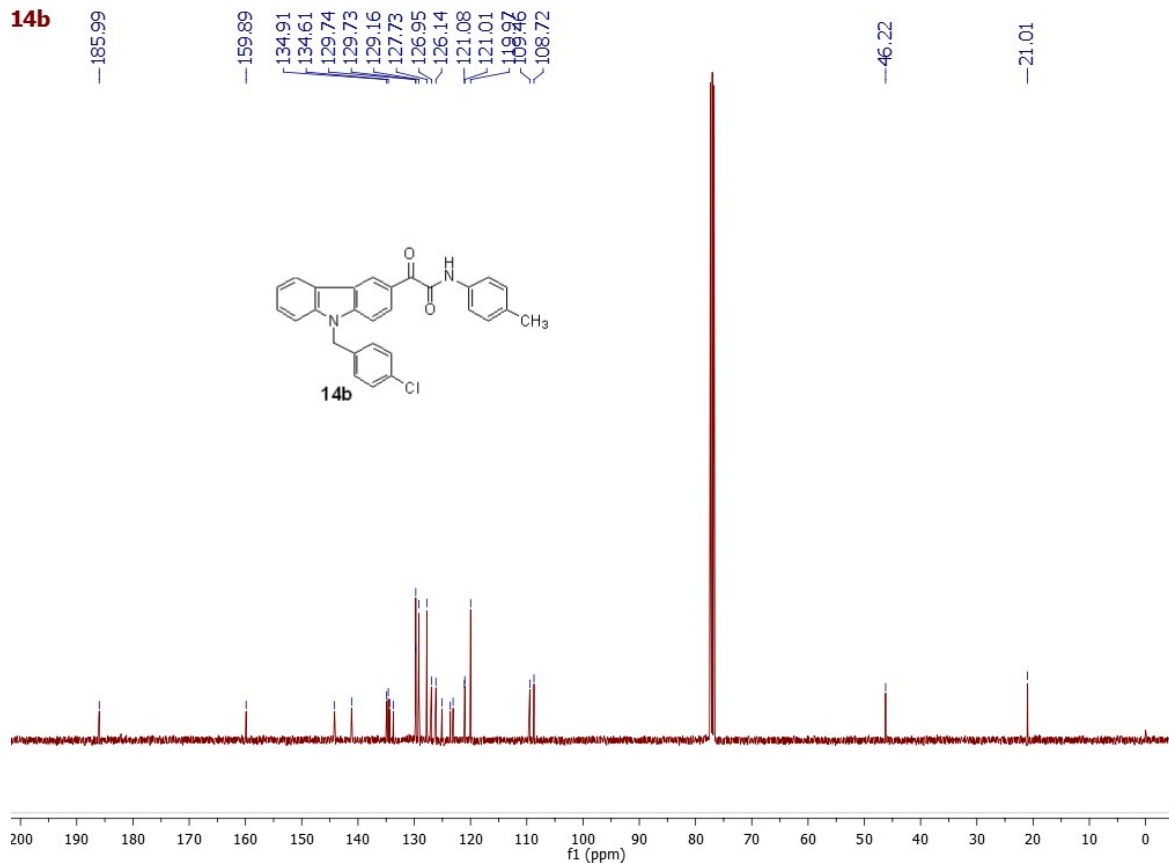

T: FTMS {1,1} + p ESI Full ms [100.00-2000.00]

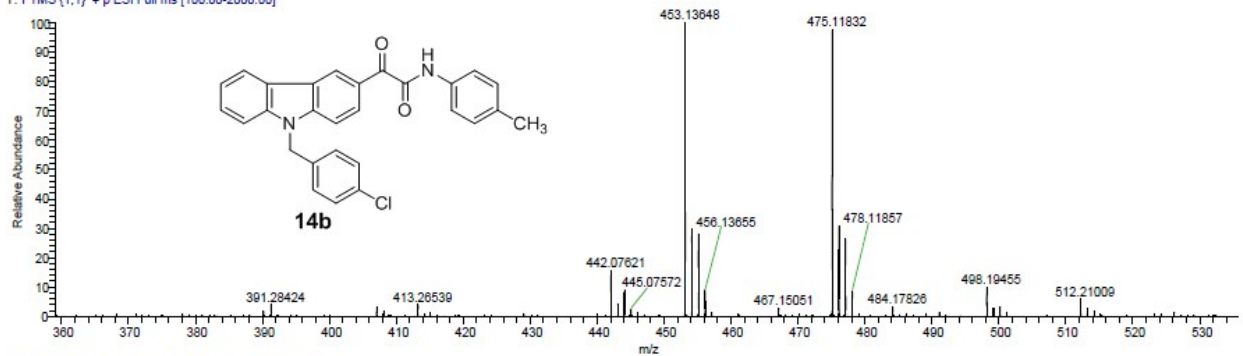

ARP-2#8-30 RT: 0.03-0.11 AV: 23

T: FTMS {1,1} + p ESI Full ms [100.00-2000.00]

m/z = 452.18-453.58

| m/z       | Intensity | Relative | Theo. Mass | Delta (ppm) | RDB equiv. | Composition                                                      |
|-----------|-----------|----------|------------|-------------|------------|------------------------------------------------------------------|
| 453.13662 | 626576.2  | 100.00   | 453.13643  | 0.40        | 18.5       | C <sub>28</sub> H <sub>22</sub> O <sub>2</sub> N <sub>2</sub> Cl |

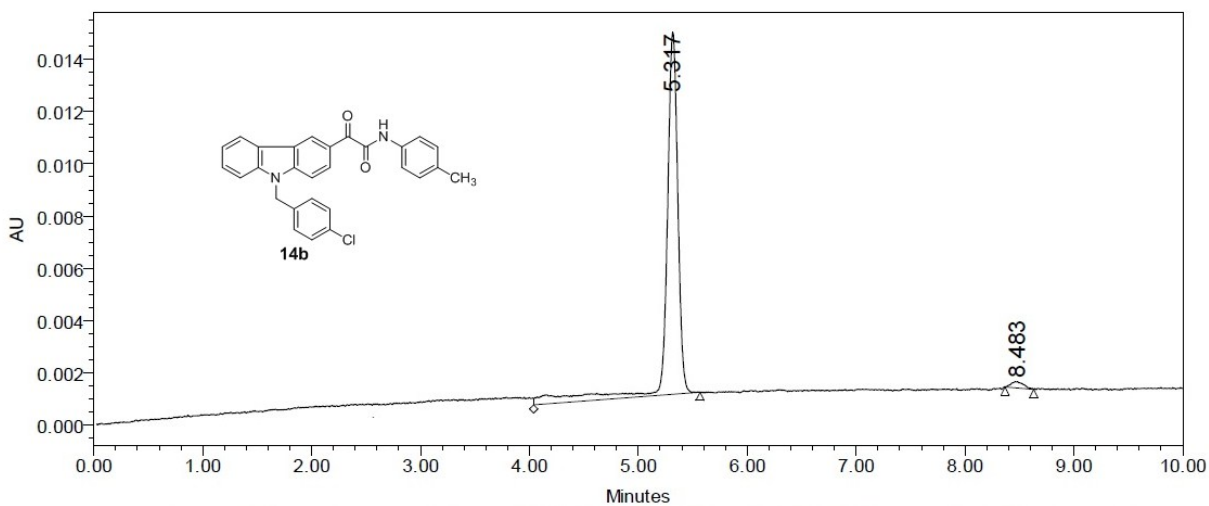

Channel: 2998; Processed Channel: PDA 340.0 nm; Result Id: 3984; Processing Method: cga2

**Processed Channel Descr.: PDA 340.0 nm**

|   | Processed Channel Descr. | RT    | Area   | % Area | Height |
|---|--------------------------|-------|--------|--------|--------|
| 1 | PDA 340.0 nm             | 5.317 | 102327 | 98.10  | 13851  |
| 2 | PDA 340.0 nm             | 8.483 | 1978   | 1.90   | 249    |

**14c**

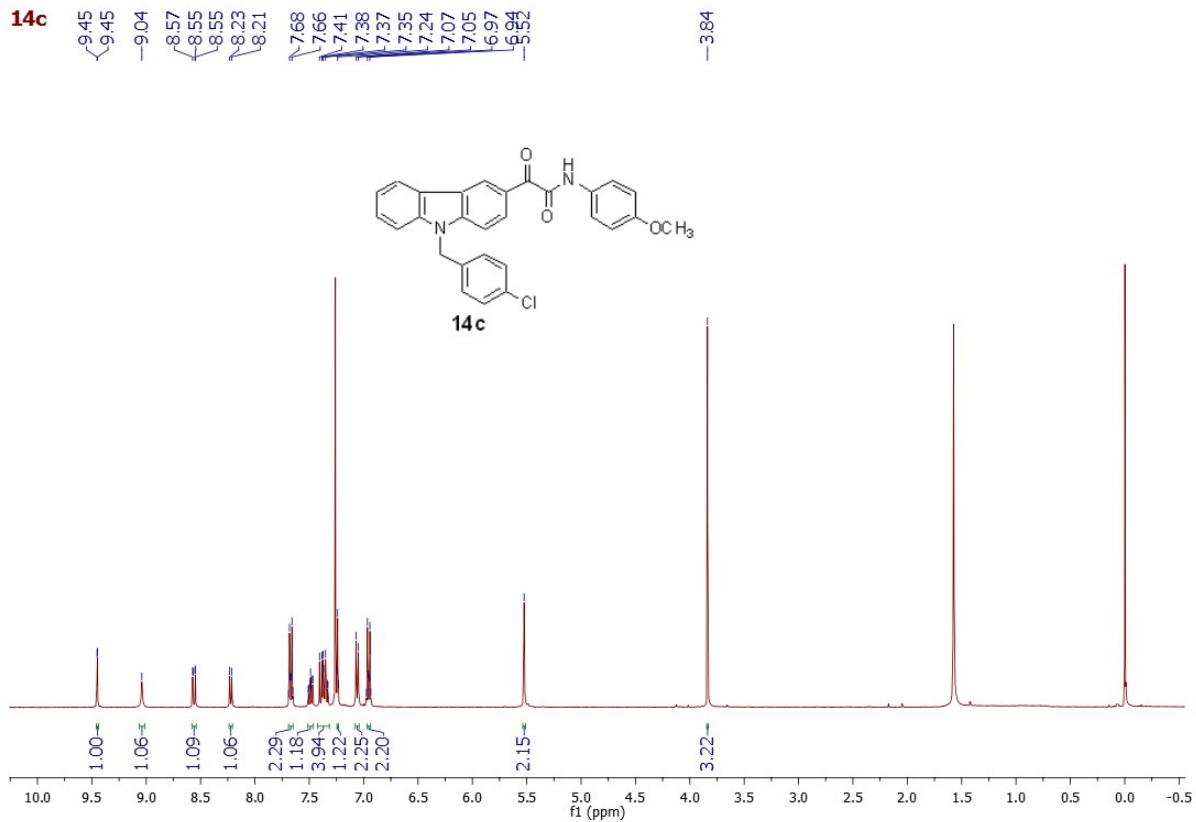

**14c**

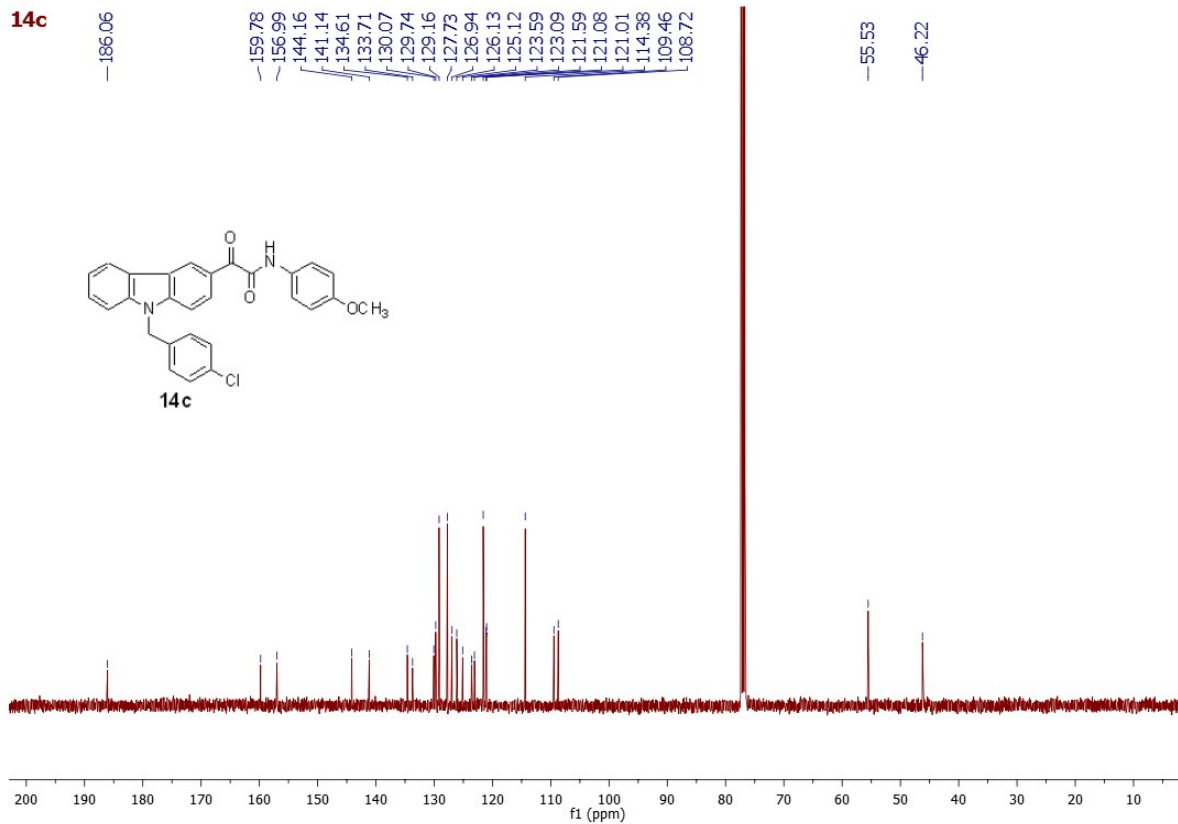

T: FTMS (1,1) + p ESI Full ms [100.00-2000.00]

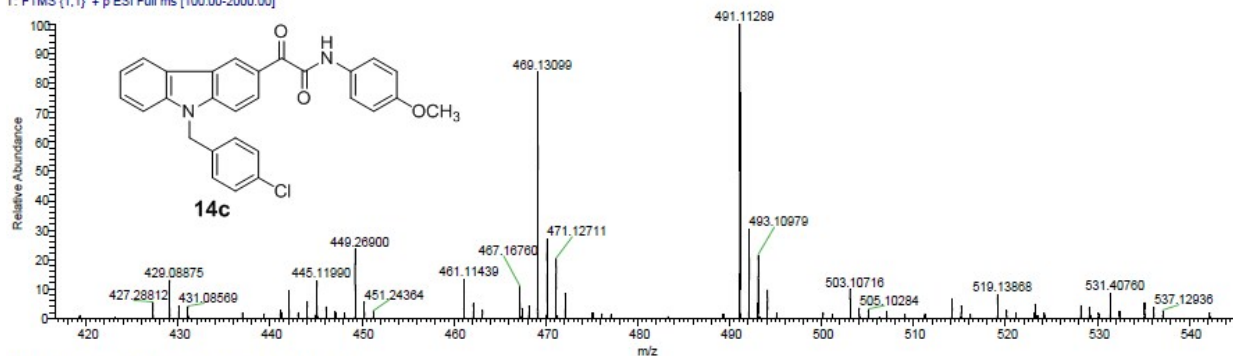

ARP-3CG#8-30 RT: 0.03-0.11 AV: 23

T: FTMS (1,1) + p ESI Full ms [100.00-2000.00]

m/z = 467.94-469.55

| m/z       | Intensity | Relative | Theo. Mass | Delta (ppm) | RDB equiv. | Composition                                                      |
|-----------|-----------|----------|------------|-------------|------------|------------------------------------------------------------------|
| 469.13148 | 383894.2  | 100.00   | 469.13135  | 0.28        | 18.5       | C <sub>28</sub> H <sub>22</sub> O <sub>3</sub> N <sub>2</sub> Cl |

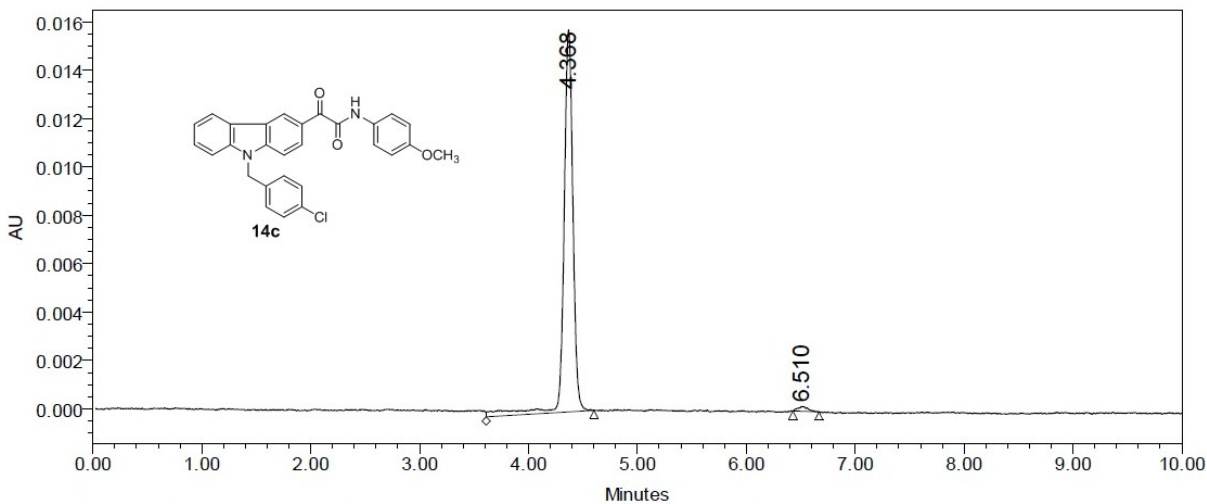

Channel: 2998; Processed Channel: PDA 350.0 nm; Result Id: 4018; Processing Method: cga3a

**Processed Channel Descr.: PDA  
350.0 nm**

|   | Processed Channel Descr. | RT    | Area  | % Area | Height |
|---|--------------------------|-------|-------|--------|--------|
| 1 | PDA 350.0 nm             | 4.368 | 92435 | 98.67  | 15782  |
| 2 | PDA 350.0 nm             | 6.510 | 1245  | 1.33   | 199    |

**14d**

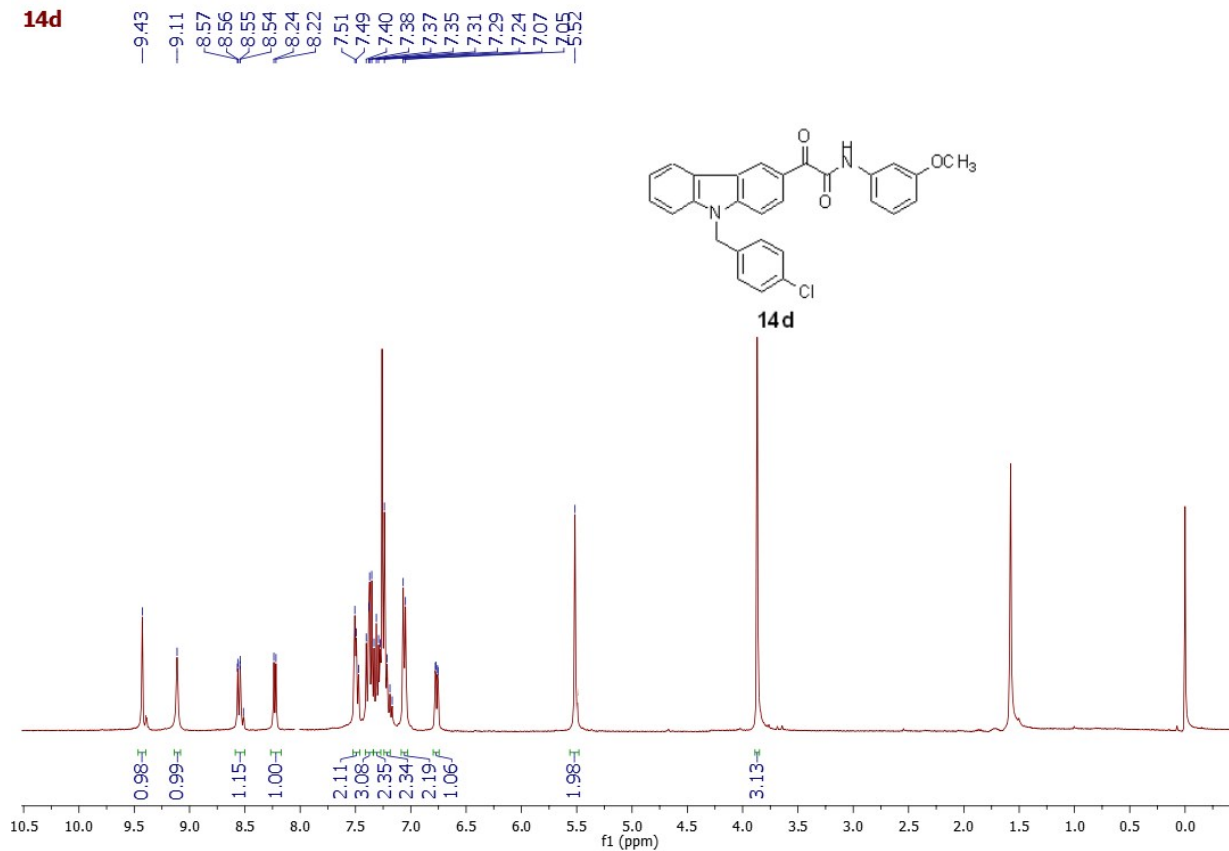

**14d**

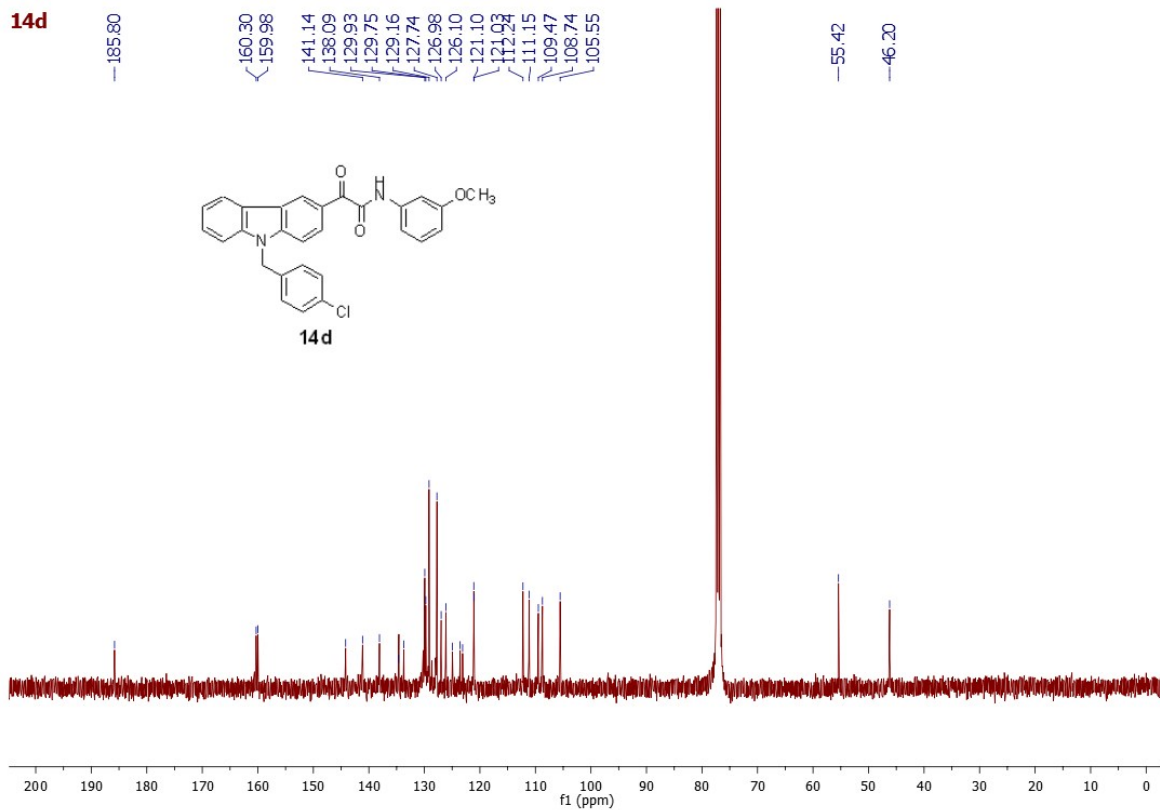

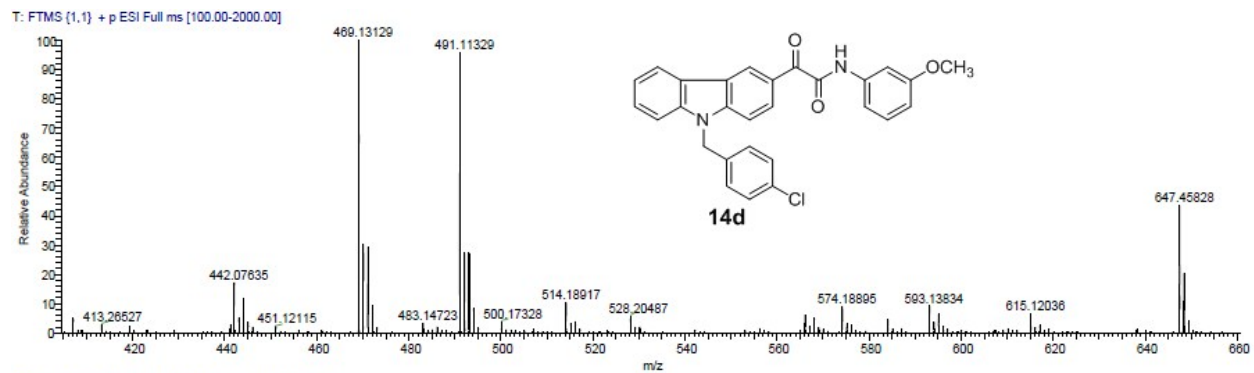

ARD-4#8-30 RT: 0.03-0.11 AV: 23  
 T: FTMS (1,1) + p ESI Full ms [100.00-2000.00]  
 m/z = 450.13-478.25

| m/z       | Intensity | Relative | Theo. Mass | Delta (ppm) | RDB equiv. | Composition                                                      |
|-----------|-----------|----------|------------|-------------|------------|------------------------------------------------------------------|
| 469.13160 | 698277.9  | 100.00   | 469.13135  | 0.54        | 18.5       | C <sub>28</sub> H <sub>22</sub> O <sub>3</sub> N <sub>2</sub> Cl |

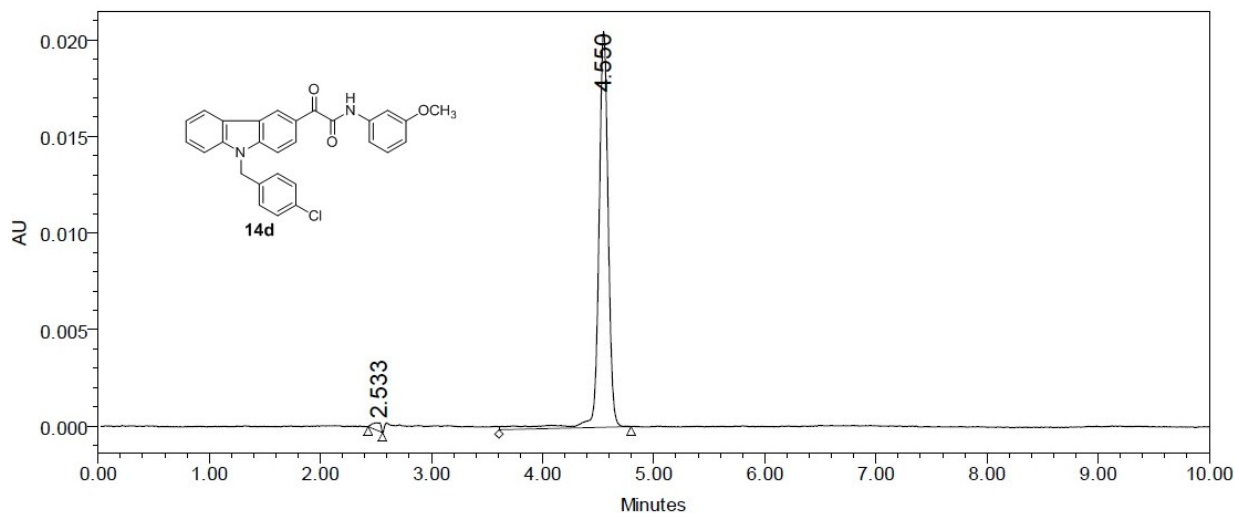

Channel: 2998; Processed Channel: PDA 302.5 nm; Result Id: 4011; Processing Method: cga4

**Processed Channel Descr.: PDA 302.5 nm**

|   | Processed Channel Descr. | RT    | Area   | % Area | Height |
|---|--------------------------|-------|--------|--------|--------|
| 1 | PDA 302.5 nm             | 2.533 | 2033   | 1.64   | 443    |
| 2 | PDA 302.5 nm             | 4.550 | 122099 | 98.36  | 20475  |

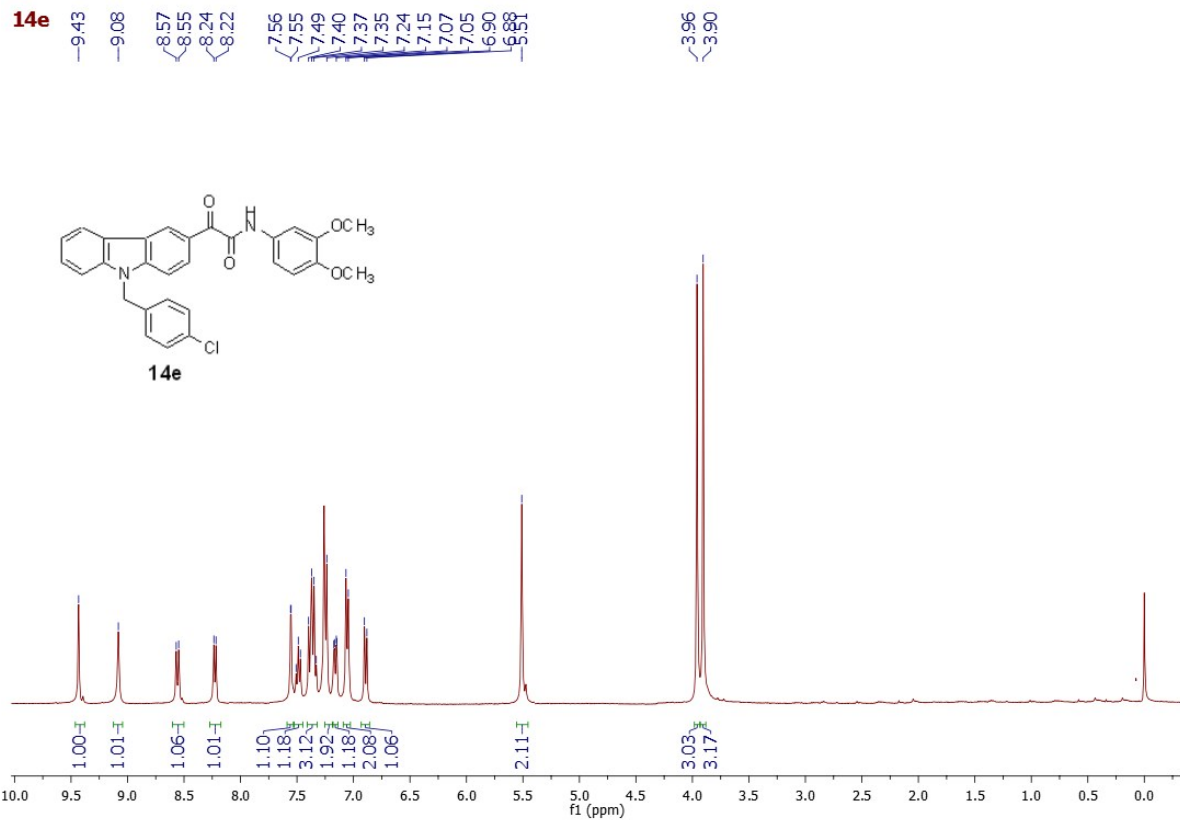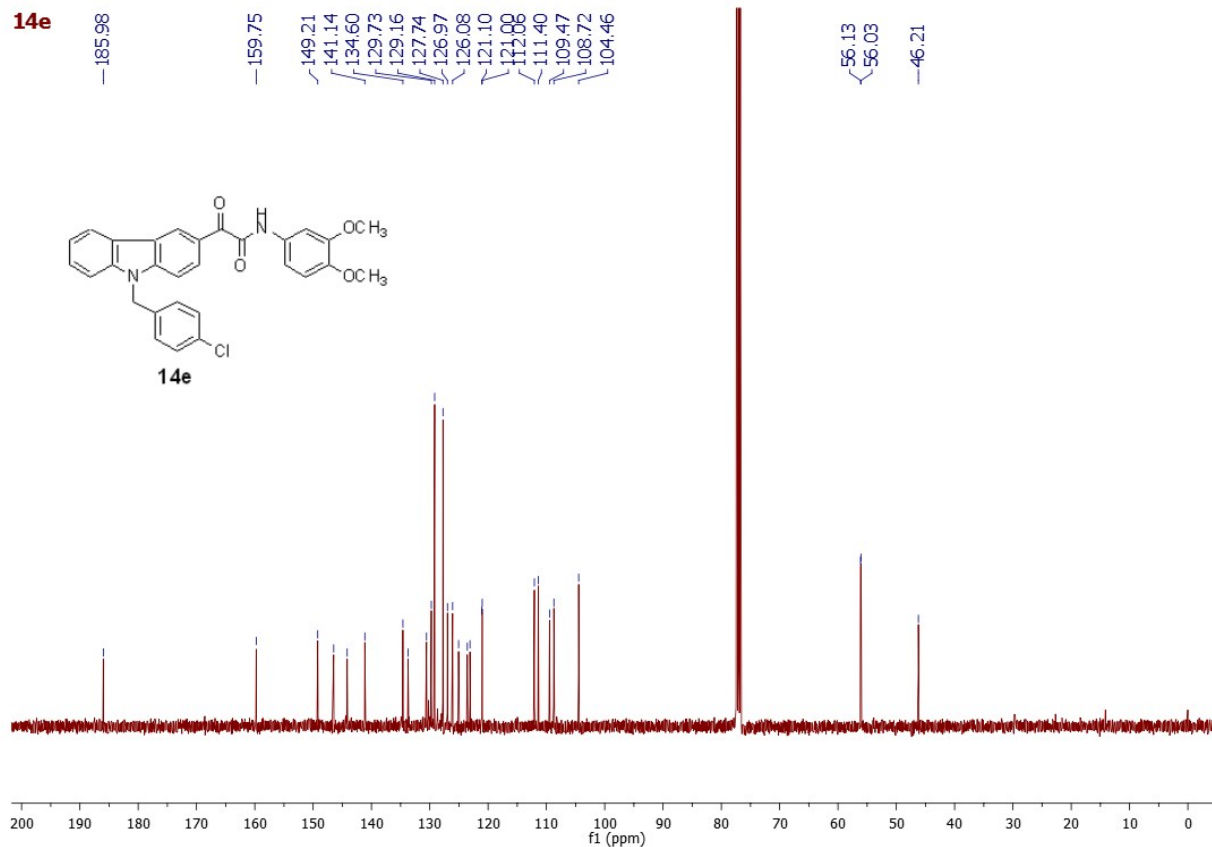



ARP-5 #89 RT: 0.24 AV: 1 SB: 523 0.21-1.97 NL: 5.13E5  
 T: FTMS [1,1] + p ESI Full ms [100.00-2000.00]

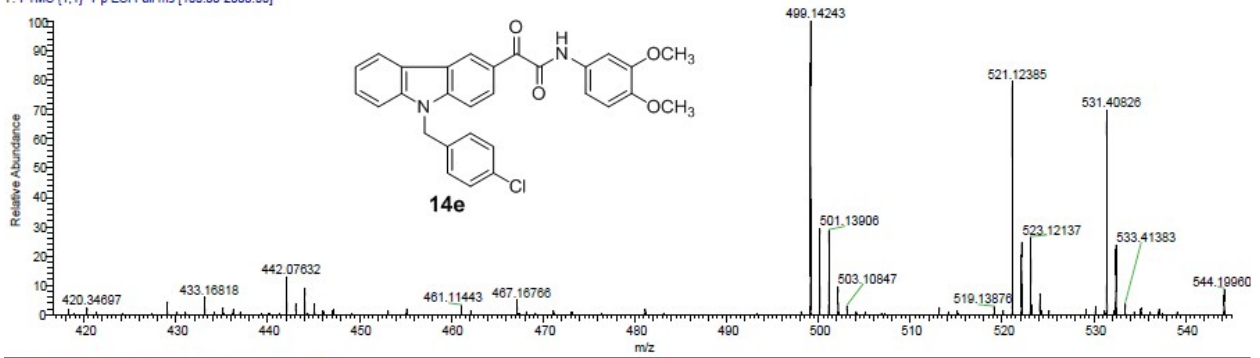

ARP-5#8-30 RT: 0.03-0.11 AV: 23  
 T: FTMS [1,1] + p ESI Full ms [100.00-2000.00]  
 m/z = 495.88-502.80

| m/z       | Intensity | Relative | Theo. Mass | Delta (ppm) | RDB equiv. | Composition                                                      |
|-----------|-----------|----------|------------|-------------|------------|------------------------------------------------------------------|
| 499.14208 | 919160.6  | 100.00   | 499.14191  | 0.35        | 18.5       | C <sub>29</sub> H <sub>24</sub> O <sub>4</sub> N <sub>2</sub> Cl |

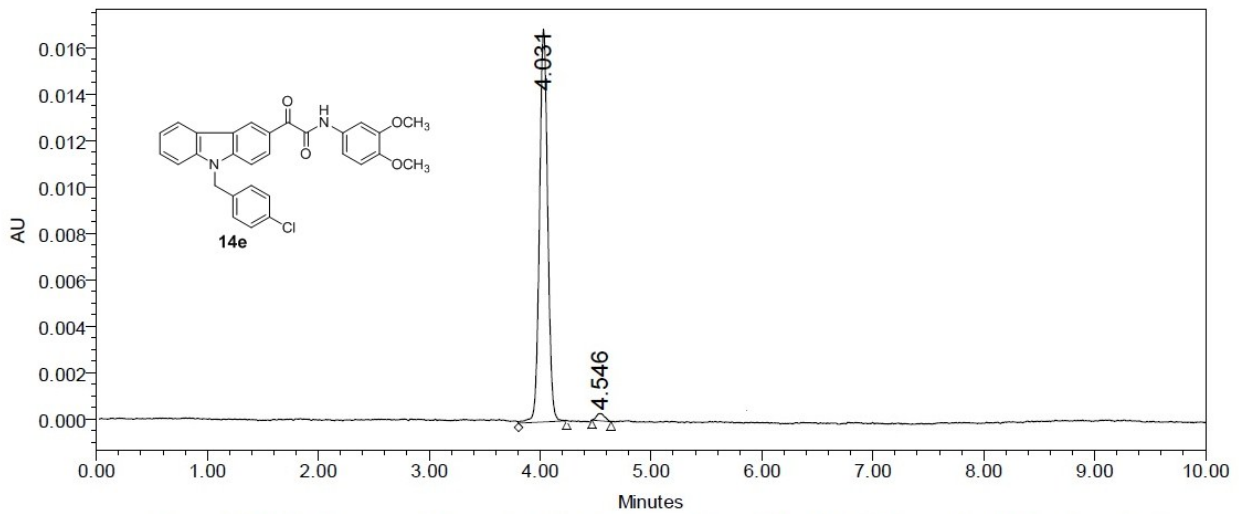

Channel: 2998; Processed Channel: PDA 328.7 nm; Result Id: 4083; Processing Method: cga5ab

**Processed Channel Descr.: PDA  
328.7 nm**

|   | Processed Channel Descr. | RT    | Area  | % Area | Height |
|---|--------------------------|-------|-------|--------|--------|
| 1 | PDA 328.7 nm             | 4.031 | 86820 | 98.17  | 16917  |
| 2 | PDA 328.7 nm             | 4.546 | 1620  | 1.83   | 305    |

14f

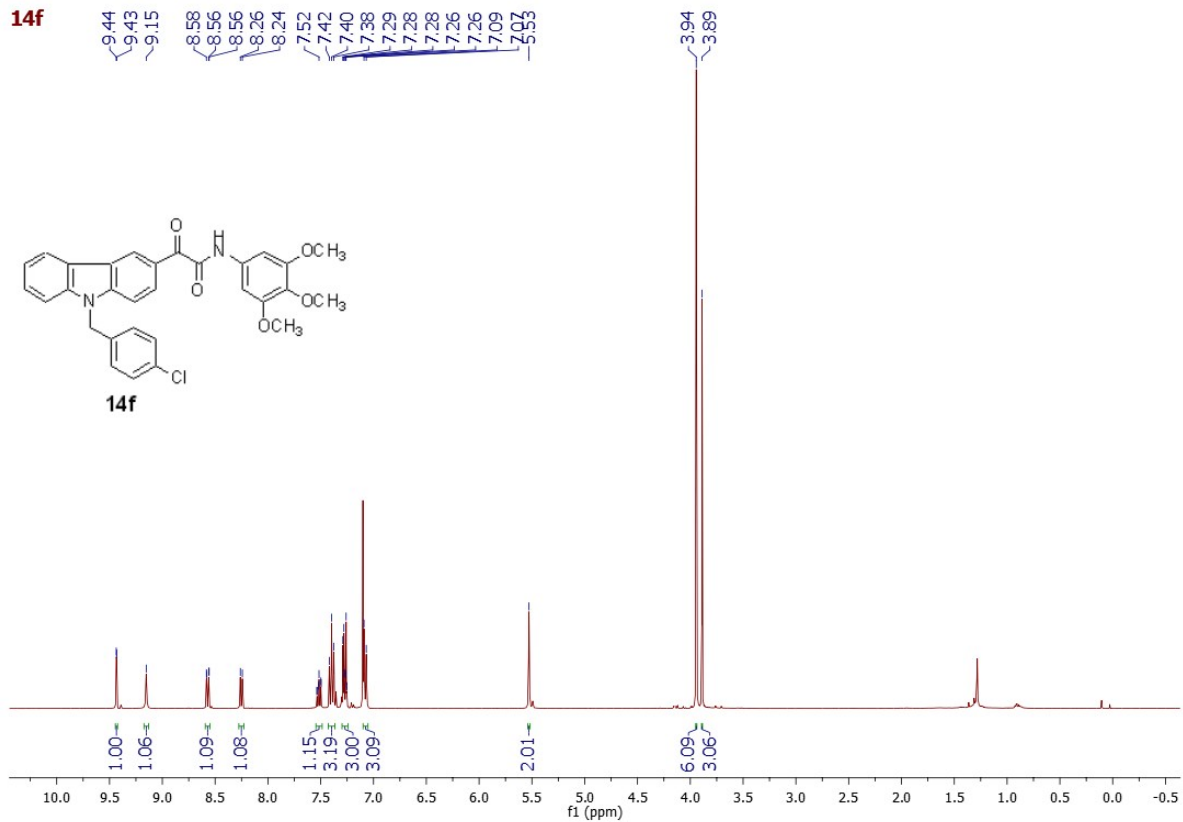

14f

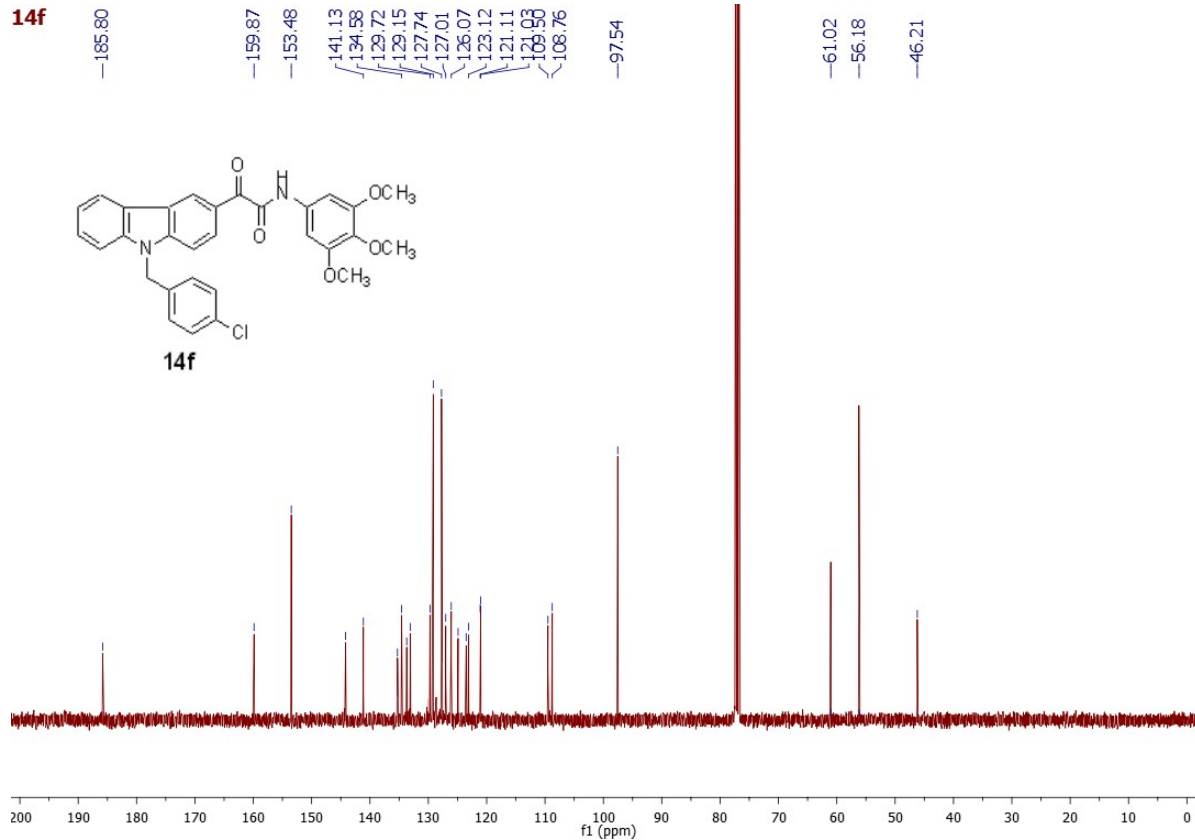

T: FTMS (1,1) + p ESI Full ms [100.00-2000.00]

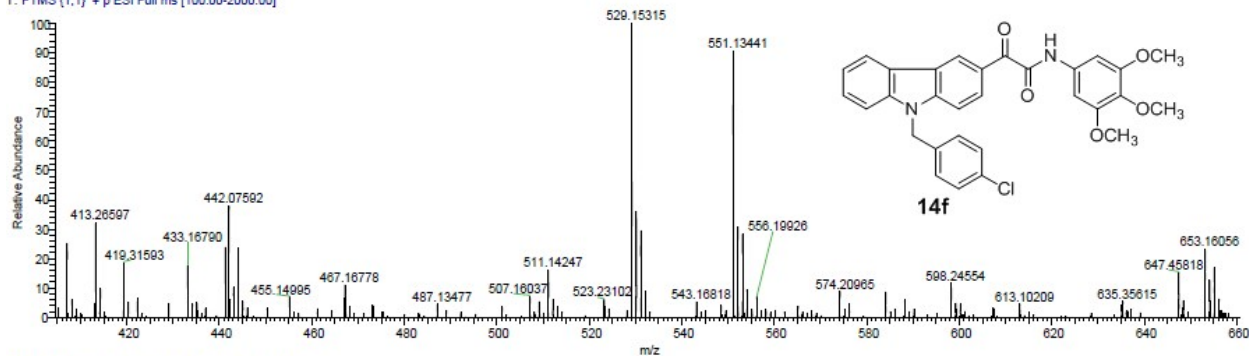

ARP-6#8-30 RT: 0.03-0.11 AV: 23

T: FTMS (1,1) + p ESI Full ms [100.00-2000.00]

m/z = 526.06-532.80

| m/z       | Intensity | Relative | Theo. Mass | Delta (ppm) | RDB equiv. | Composition                                                      |
|-----------|-----------|----------|------------|-------------|------------|------------------------------------------------------------------|
| 529.15558 | 284860.3  | 100.00   | 529.15248  | 5.87        | 18.5       | C <sub>30</sub> H <sub>26</sub> O <sub>5</sub> N <sub>2</sub> Cl |

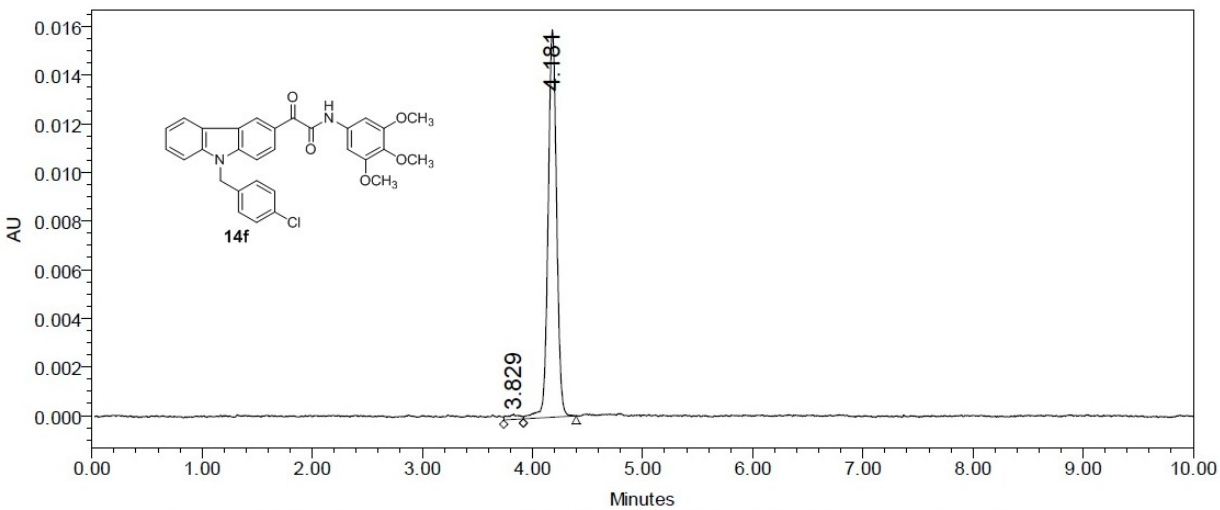

Channel: 2998; Processed Channel: PDA 350.9 nm; Result Id: 4079; Processing Method: cga6

**Processed Channel Descr.: PDA  
350.9 nm**

|   | Processed Channel Descr. | RT    | Area  | % Area | Height |
|---|--------------------------|-------|-------|--------|--------|
| 1 | PDA 350.9 nm             | 3.829 | 1598  | 1.83   | 209    |
| 2 | PDA 350.9 nm             | 4.181 | 85757 | 98.17  | 15917  |

**14g**

9.43  
9.43  
9.13  
8.56  
8.54  
8.54  
8.23  
8.21  
7.73  
7.72  
7.71  
7.40  
7.38  
7.37  
7.35  
7.26  
7.24  
7.11  
7.07  
7.05

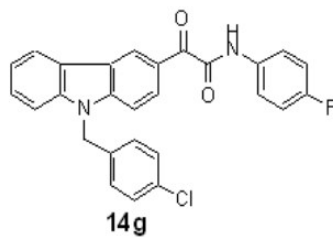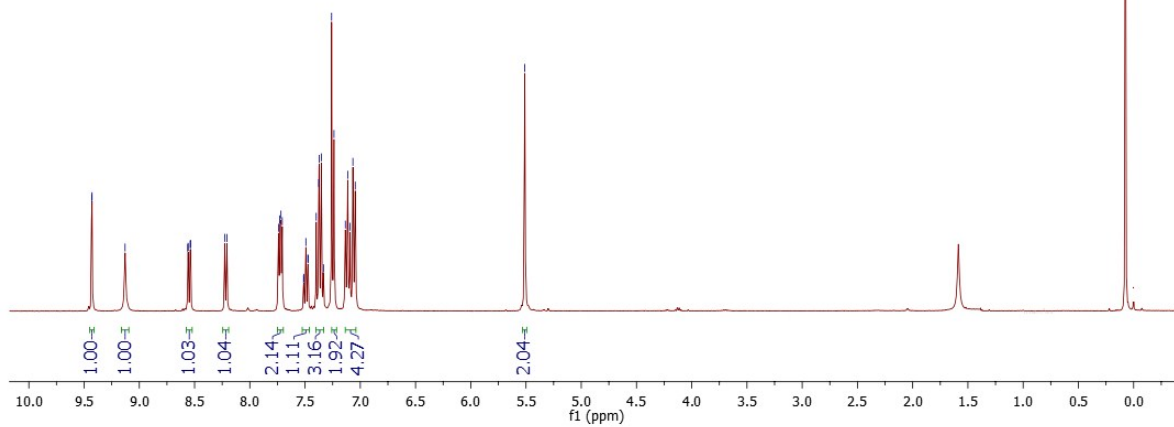

**14g**

185.69  
159.92  
144.25  
141.17  
134.58  
133.75  
133.00  
132.98  
129.75  
129.19  
127.74  
127.04  
126.16  
124.92  
123.57  
123.15  
121.78  
121.70  
121.09  
116.09  
115.87  
113.42  
109.52  
108.79  
46.24

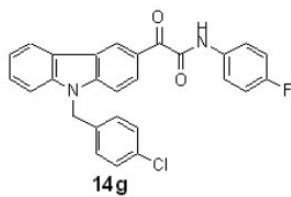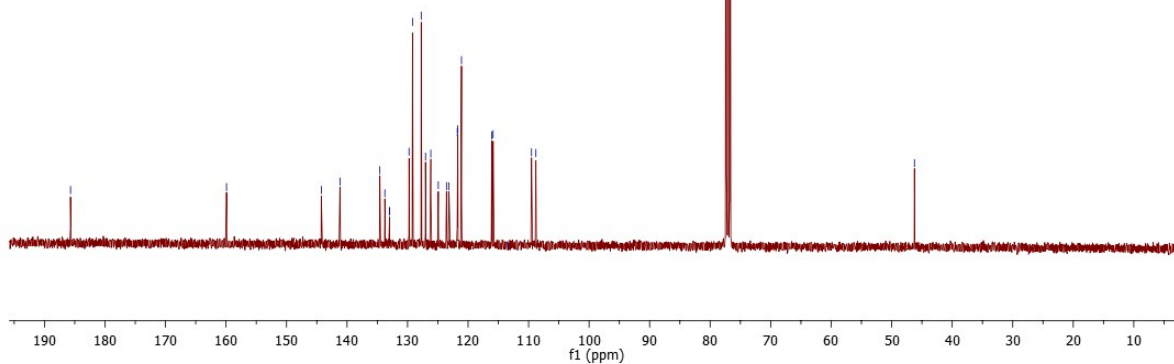

**14h**

9.40  
9.32  
8.62  
8.61  
8.53  
8.23  
8.22  
7.70  
7.68  
7.50  
7.48  
7.41  
7.38  
7.36  
7.35  
7.24  
7.07  
5.95

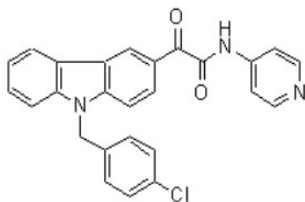

**14h**

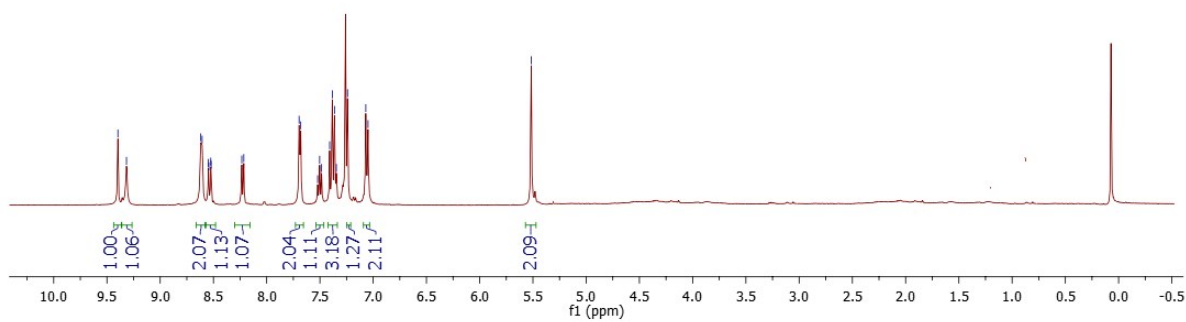

**14h**

184.61  
160.49  
150.99  
144.40  
143.85  
141.21  
134.49  
133.80  
129.80  
129.22  
127.74  
127.18  
126.20  
124.46  
123.49  
123.27  
121.21  
121.10  
113.85  
109.60  
108.94  
46.28

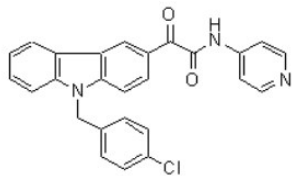

**14h**

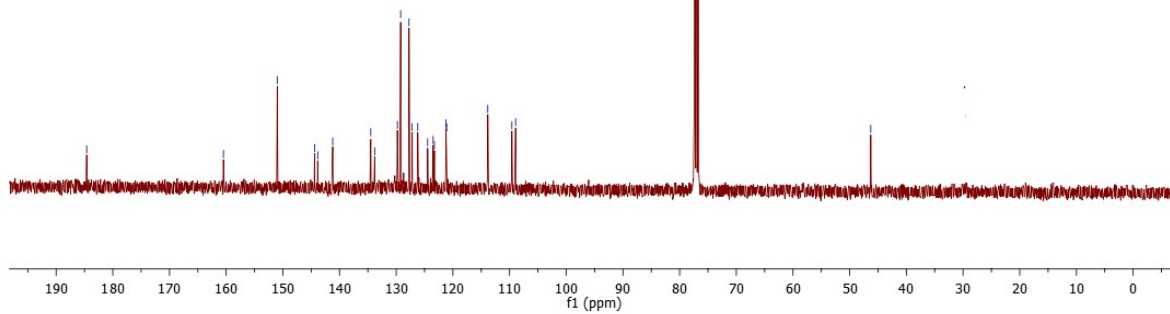

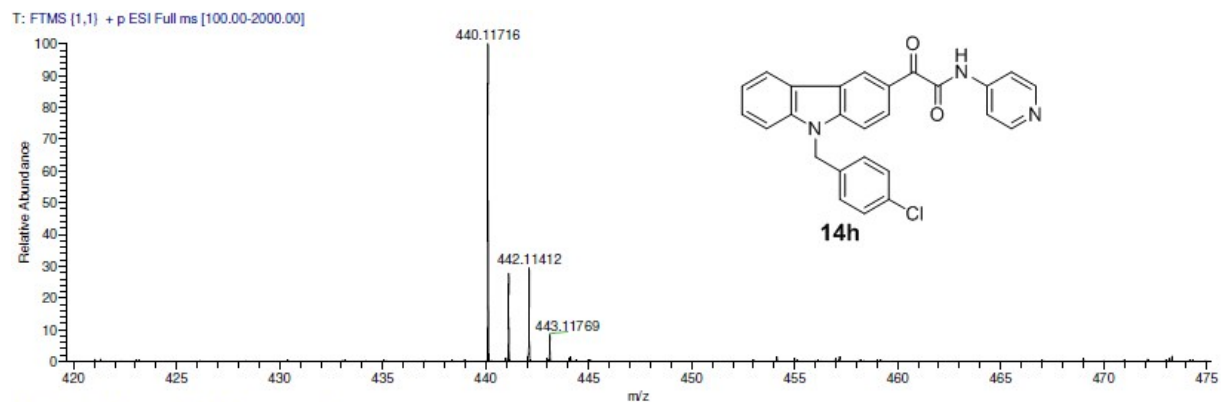

ARP-9#8-30 RT: 0.03-0.11 AV: 23

T: FTMS (1,1) + p ESI Full ms [100.00-2000.00]

m/z= 435.97-445.39

| m/z       | Intensity | Relative | Theo. Mass | Delta (ppm) | RDB equiv. | Composition                                                      |
|-----------|-----------|----------|------------|-------------|------------|------------------------------------------------------------------|
| 440.11712 | 7499132.5 | 100.00   | 440.11603  | 1.09        | 18.5       | C <sub>26</sub> H <sub>19</sub> O <sub>2</sub> N <sub>3</sub> Cl |

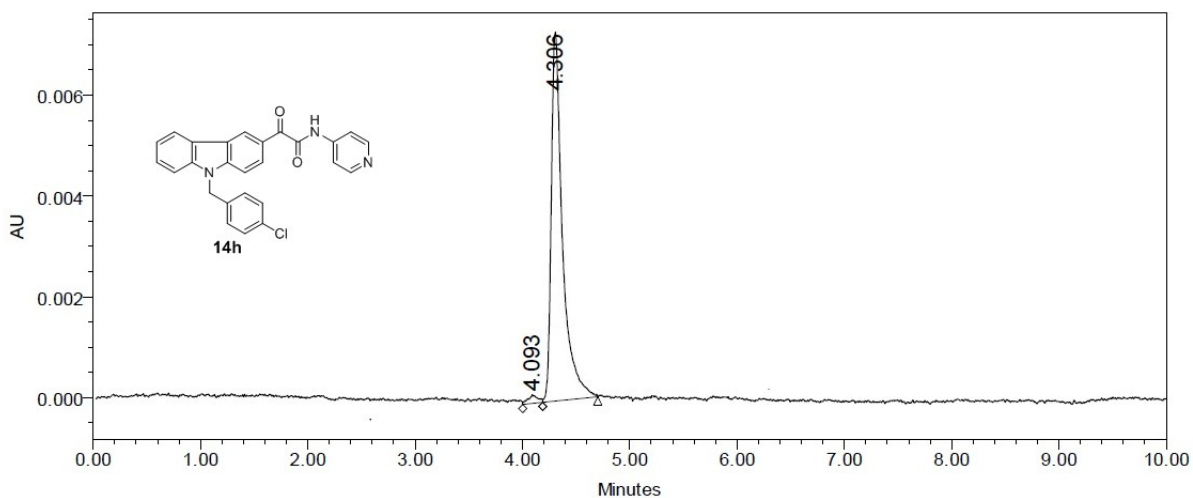

Channel: 2998; Processed Channel: PDA 345.2 nm; Result Id: 4076; Processing Method: cga9

**Processed Channel Descr.: PDA  
345.2 nm**

|   | Processed Channel Descr. | RT    | Area  | % Area | Height |
|---|--------------------------|-------|-------|--------|--------|
| 1 | PDA 345.2 nm             | 4.093 | 1073  | 1.98   | 169    |
| 2 | PDA 345.2 nm             | 4.306 | 53192 | 98.02  | 7315   |

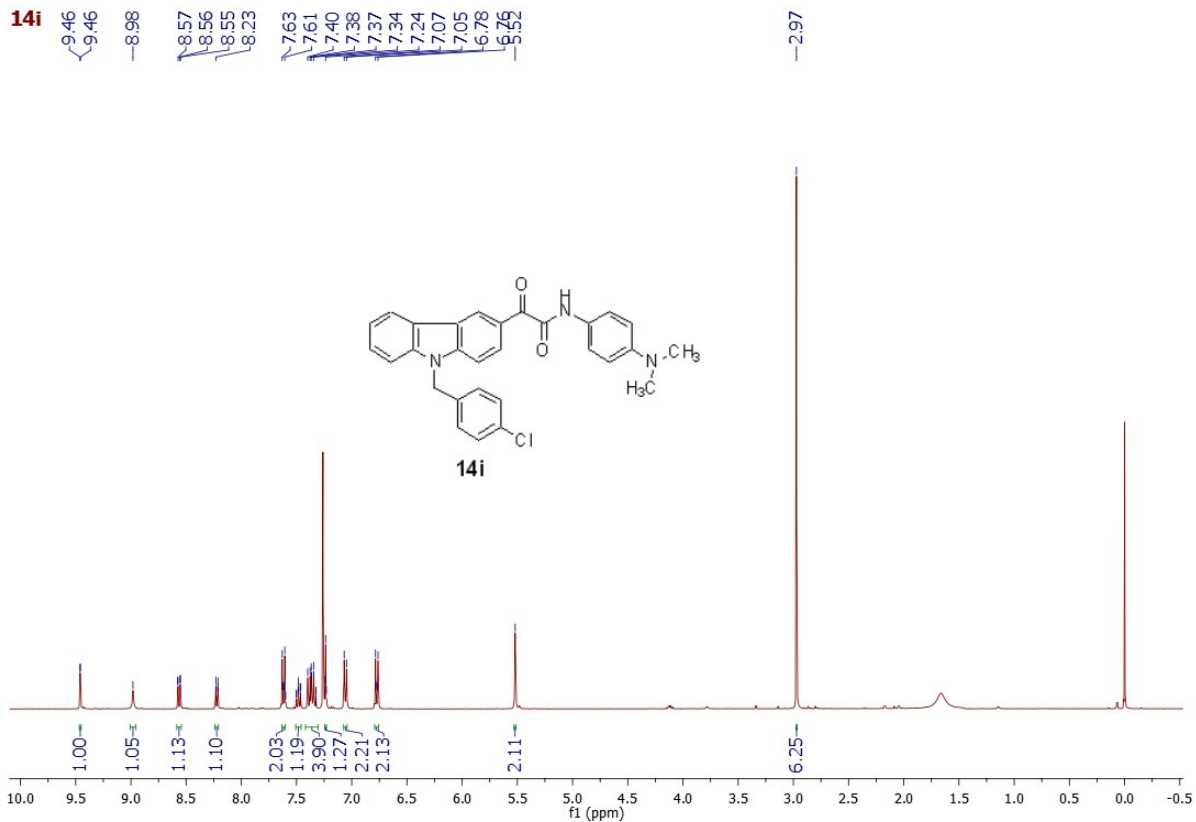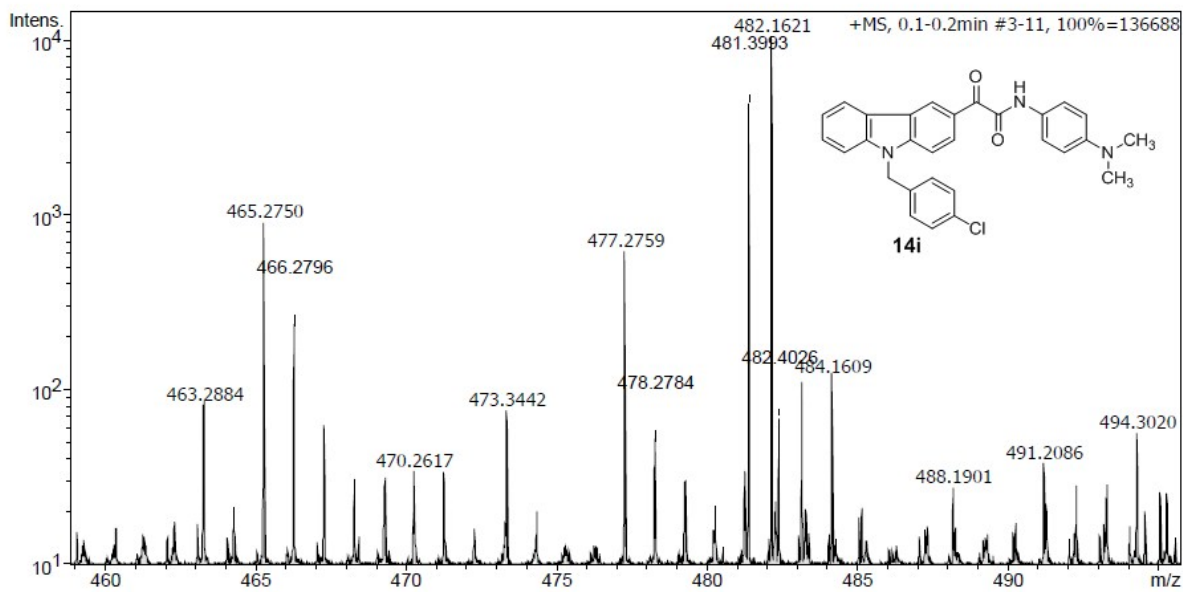

| Meas. m/z | # | Ion Formula                                                     | m/z      | err [ppm] | mSigma | # Sigma | Score  | rdb  | e <sup>-</sup> Conf | N-Rule |
|-----------|---|-----------------------------------------------------------------|----------|-----------|--------|---------|--------|------|---------------------|--------|
| 482.1621  | 1 | C <sub>29</sub> H <sub>25</sub> ClN <sub>3</sub> O <sub>2</sub> | 482.1630 | 1.9       | 12.5   | 1       | 100.00 | 18.5 | even                | ok     |

14j

9.44  
9.44  
8.89  
8.88  
8.59  
8.58  
8.57  
8.21  
8.17  
8.15  
7.39  
7.37  
7.37  
7.35  
7.34  
7.24  
7.24  
7.06  
7.06  
5.99

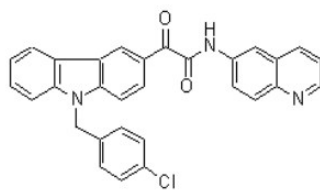

14j

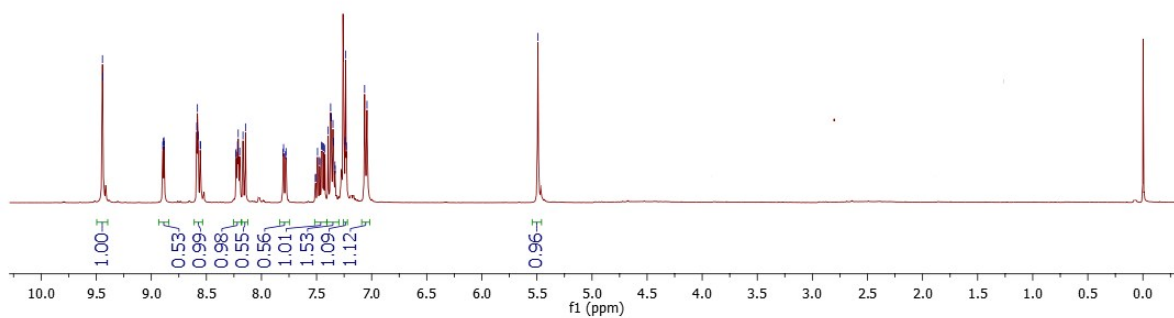

14j

185.42  
160.31  
149.49  
136.42  
134.54  
130.09  
129.77  
129.18  
127.74  
126.17  
123.42  
121.87  
121.08  
109.54  
108.83  
46.23

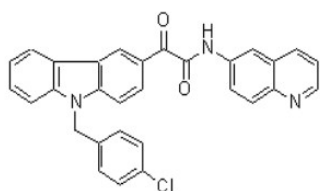

14j

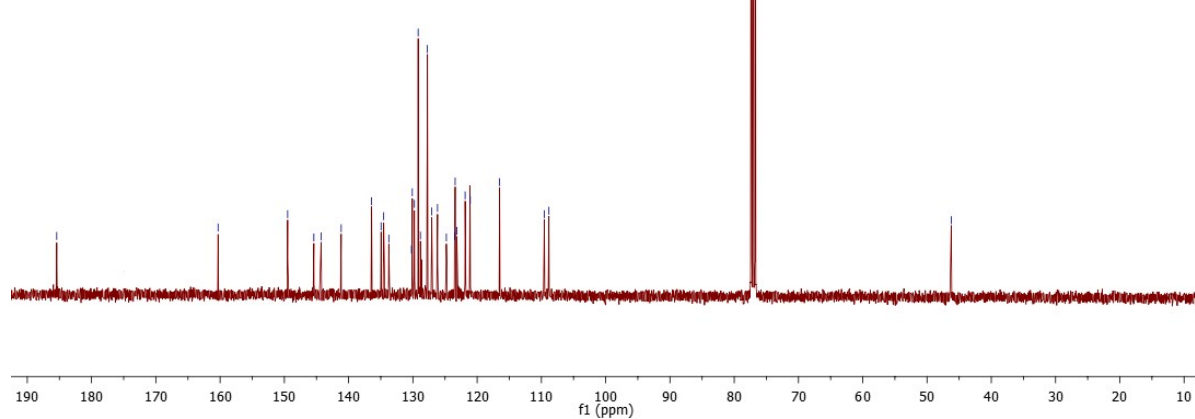



T: FTMS (1,1) + p ESI Full ms [100.00-2000.00]

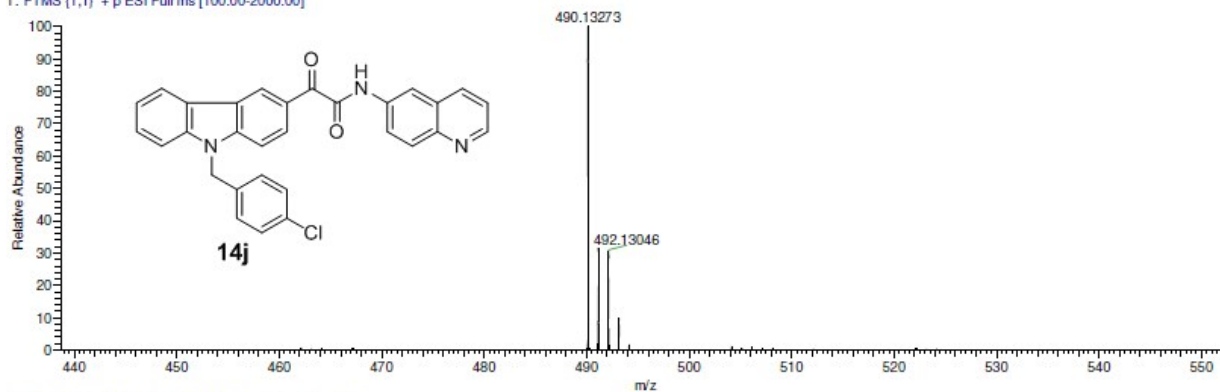

ARP-12#8-30 RT: 0.03-0.11 AV: 23

T: FTMS (1,1) + p ESI Full ms [100.00-2000.00]

m/z= 488.48-493.94

| m/z       | Intensity  | Relative | Theo. Mass | Delta (ppm) | RDB equiv. | Composition                                                      |
|-----------|------------|----------|------------|-------------|------------|------------------------------------------------------------------|
| 490.13258 | 14303507.0 | 100.00   | 490.13168  | 0.90        | 21.5       | C <sub>30</sub> H <sub>21</sub> O <sub>2</sub> N <sub>3</sub> Cl |

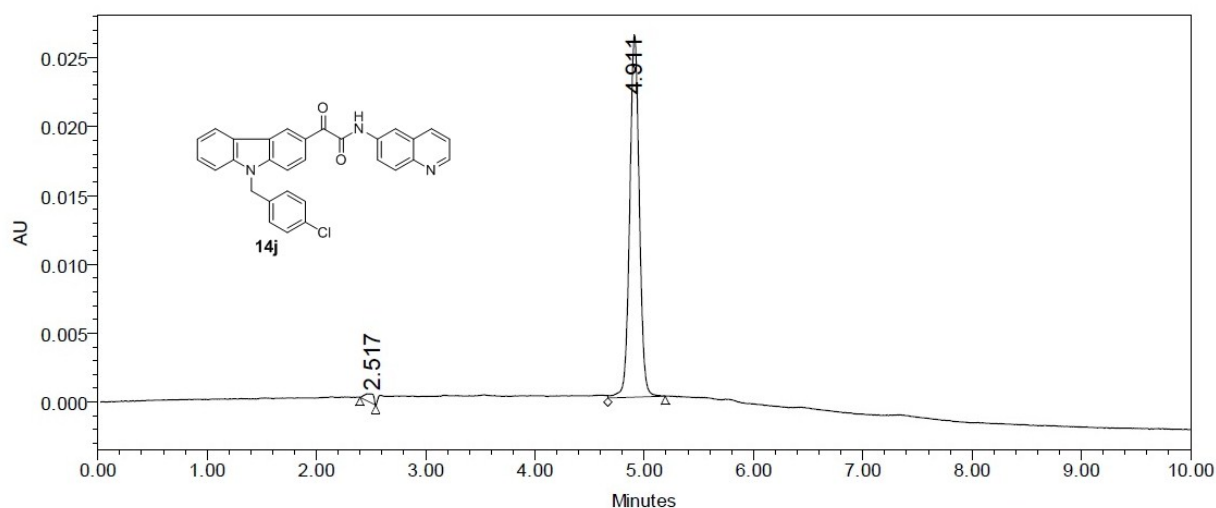

Channel: 2998; Processed Channel: PDA 304.0 nm; Result Id: 4182; Processing Method: cga12

**Processed Channel Descr.: PDA 304.0 nm**

|   | Processed Channel Descr. | RT    | Area   | % Area | Height |
|---|--------------------------|-------|--------|--------|--------|
| 1 | PDA 304.0 nm             | 2.517 | 3462   | 2.11   | 673    |
| 2 | PDA 304.0 nm             | 4.911 | 160726 | 97.89  | 26290  |

**14k**

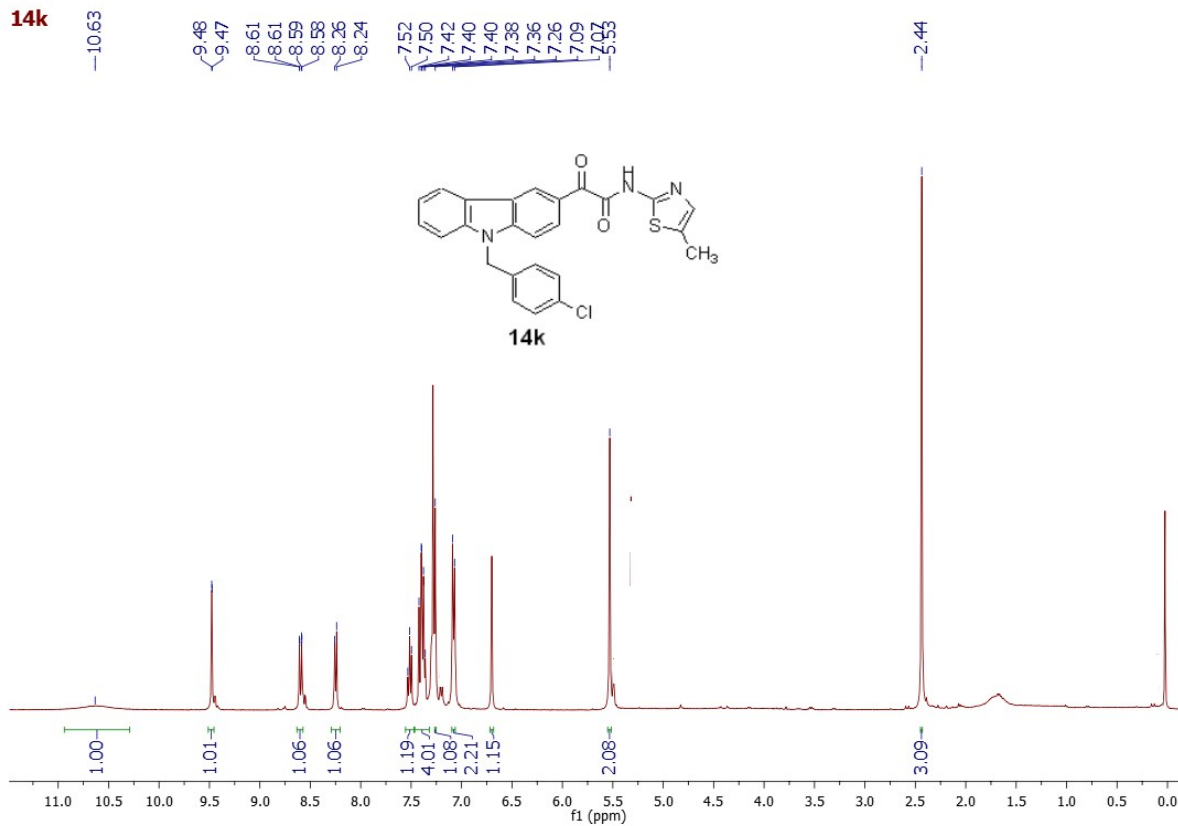

**14k**

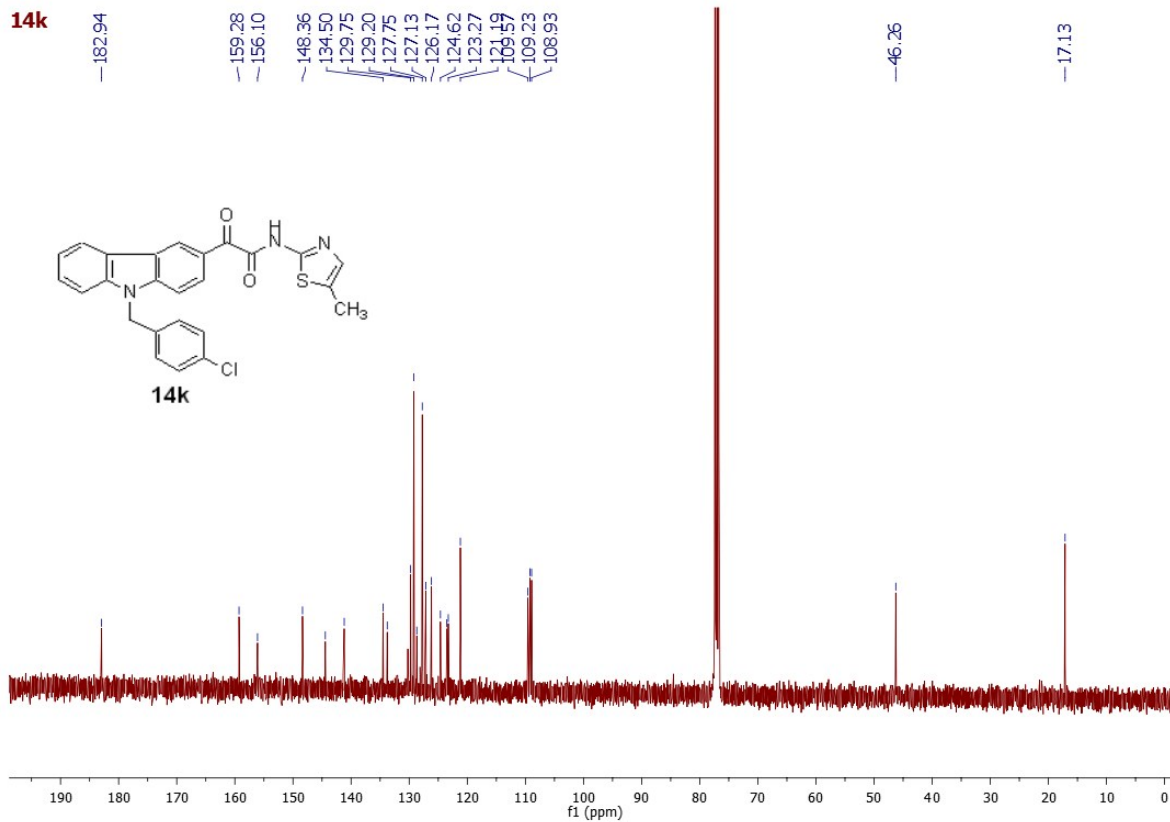

T: FTMS (1,1) + p ESI Full ms [100.00-2000.00]

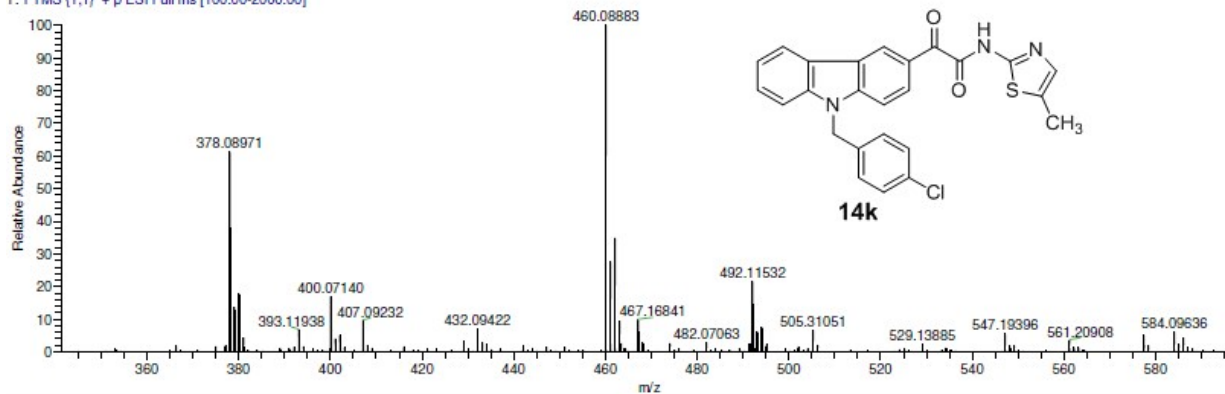

ARP-13#8-30 RT: 0.03-0.10 AV: 23

T: FTMS (1,1) + p ESI Full ms [100.00-2000.00]

m/z = 451.84-463.31

| m/z       | Intensity | Relative | Theo. Mass | Delta (ppm) | RDB equiv. | Composition                                                       |
|-----------|-----------|----------|------------|-------------|------------|-------------------------------------------------------------------|
| 460.08878 | 1213339.8 | 100.00   | 460.08810  | 0.68        | 17.5       | C <sub>25</sub> H <sub>19</sub> O <sub>2</sub> N <sub>3</sub> ClS |

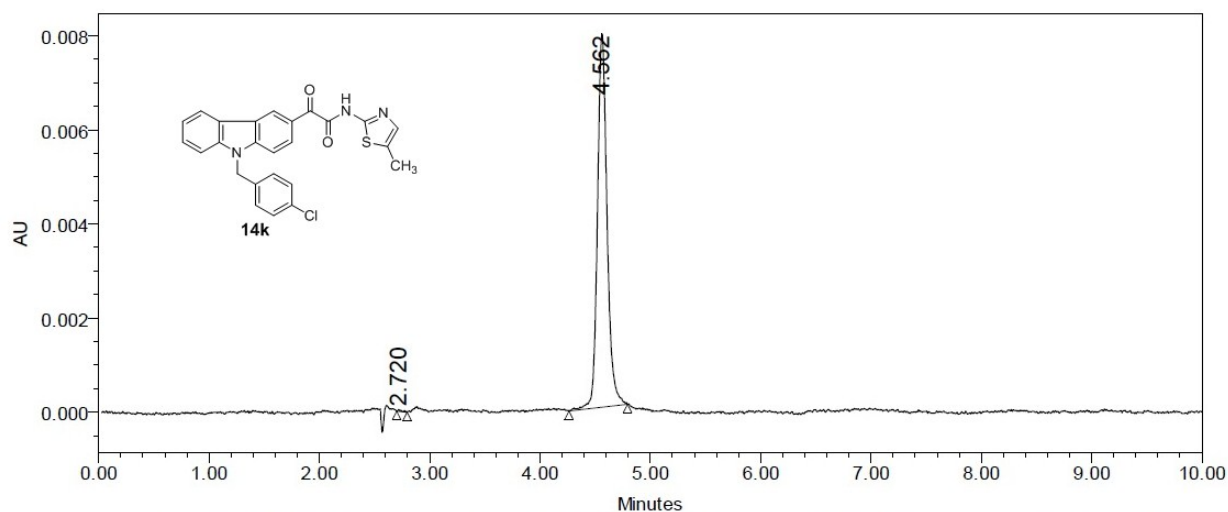

Channel: 2998; Processed Channel: PDA 350.0 nm; Result Id: 4073; Processing Method: cga13

**Processed Channel Descr.: PDA  
350.0 nm**

|   | Processed Channel Descr. | RT    | Area  | % Area | Height |
|---|--------------------------|-------|-------|--------|--------|
| 1 | PDA 350.0 nm             | 2.720 | 87    | 0.18   | 39     |
| 2 | PDA 350.0 nm             | 4.562 | 48013 | 99.82  | 7939   |

**14I**

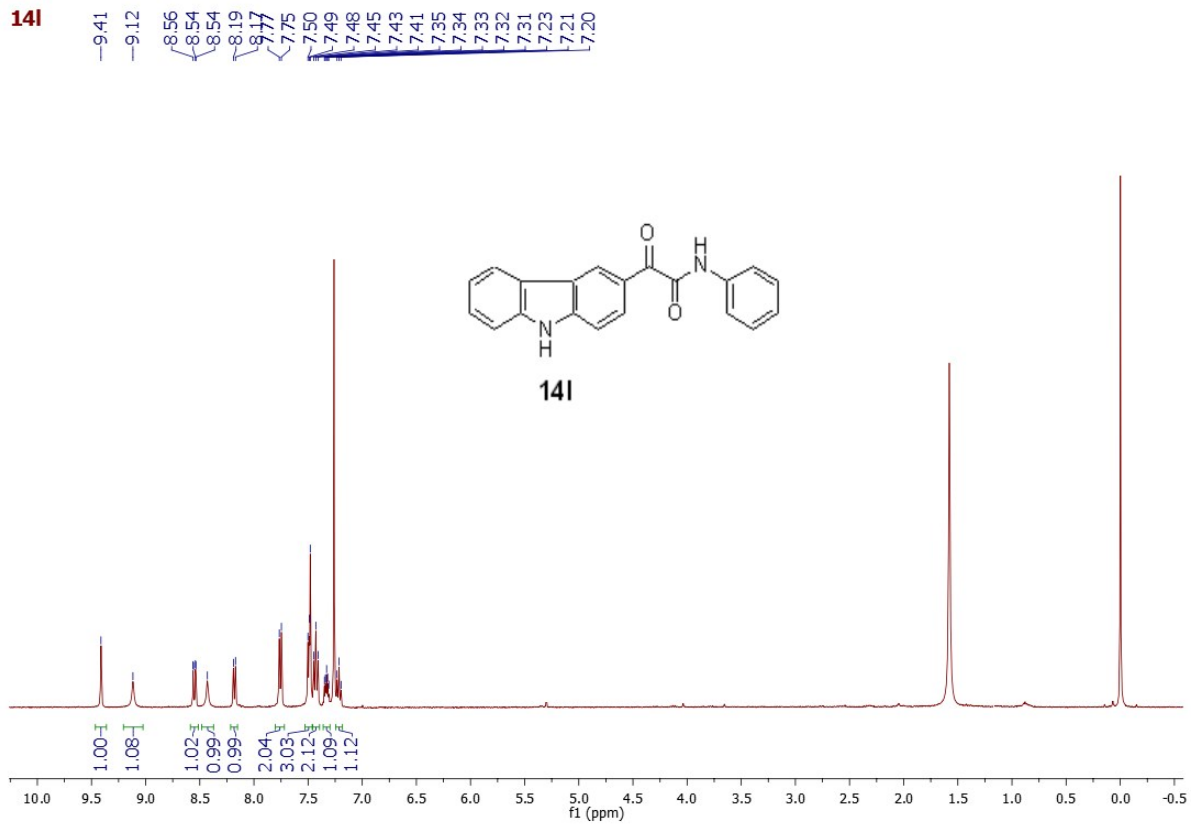

**14I**

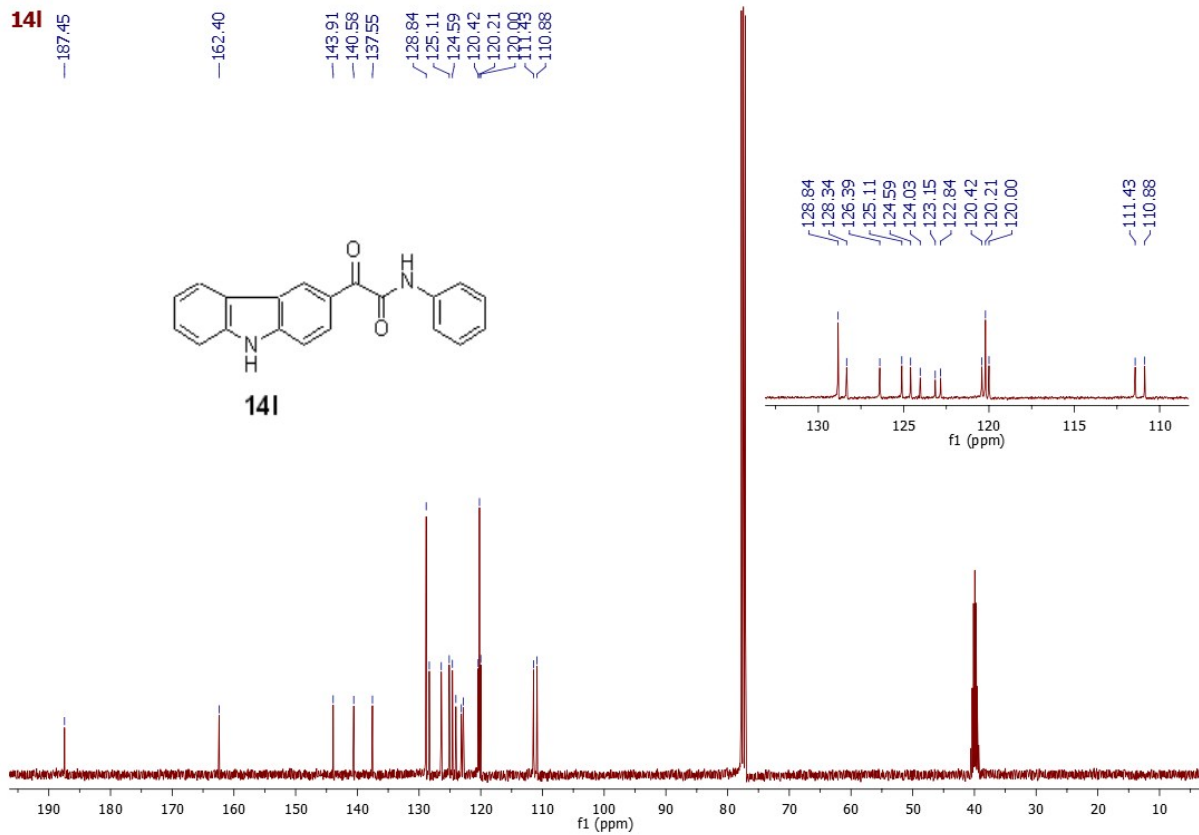

T: FTMS (1,1) + p ESI Full ms [100.00-2000.00]

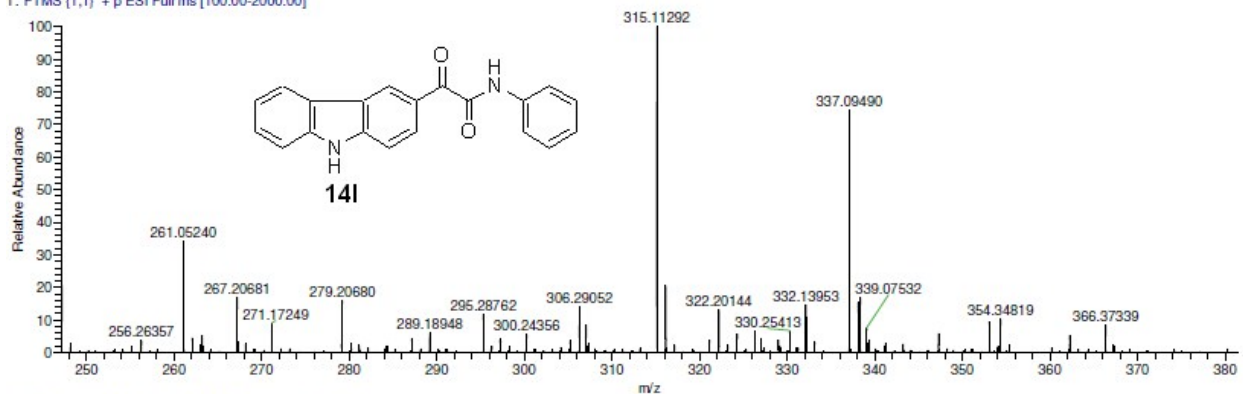

ARP-15#8-30 RT: 0.03-0.11 AV: 23

T: FTMS (1,1) + p ESI Full ms [100.00-2000.00]

m/z= 312.21-320.32

| m/z       | Intensity | Relative | Theo. Mass | Delta (ppm) | RDB equiv. | Composition                                                   |
|-----------|-----------|----------|------------|-------------|------------|---------------------------------------------------------------|
| 315.11295 | 1149074.5 | 100.00   | 315.11280  | 0.15        | 14.5       | C <sub>20</sub> H <sub>15</sub> O <sub>2</sub> N <sub>2</sub> |

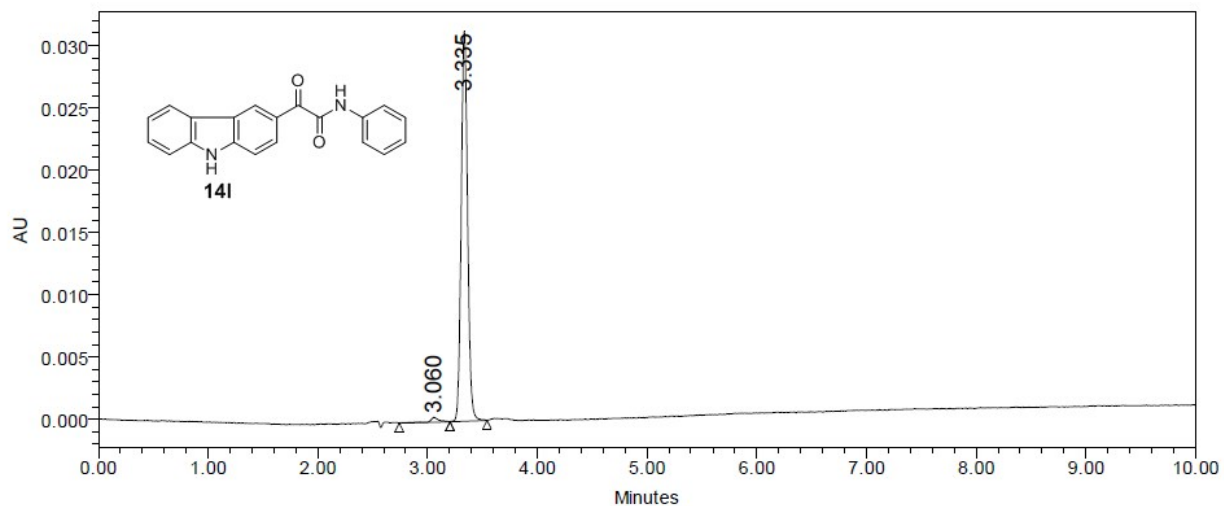

Channel: 2998; Processed Channel: PDA 350.0 nm; Result Id: 4185; Processing Method: cga15

**Processed Channel Descr.: PDA 350.0 nm**

|   | Processed Channel Descr. | RT    | Area   | % Area | Height |
|---|--------------------------|-------|--------|--------|--------|
| 1 | PDA 350.0 nm             | 3.060 | 2263   | 1.75   | 397    |
| 2 | PDA 350.0 nm             | 3.335 | 127190 | 98.25  | 31325  |

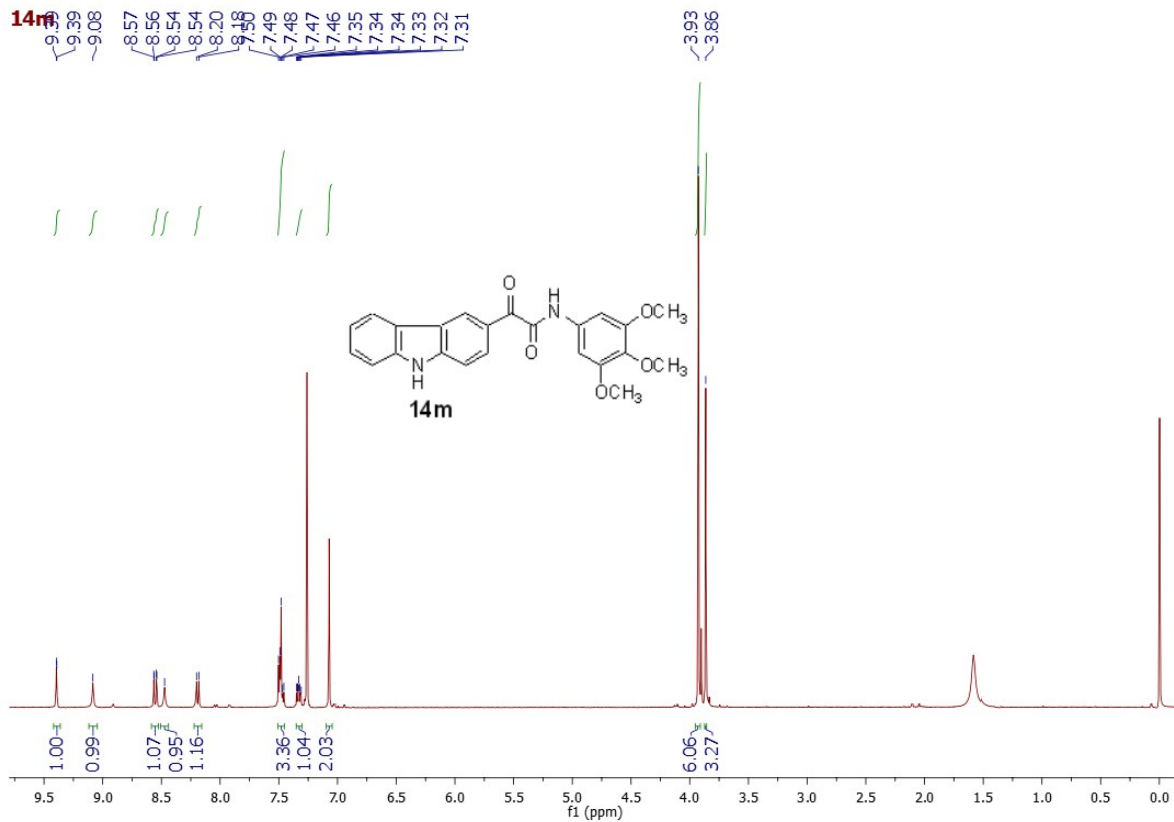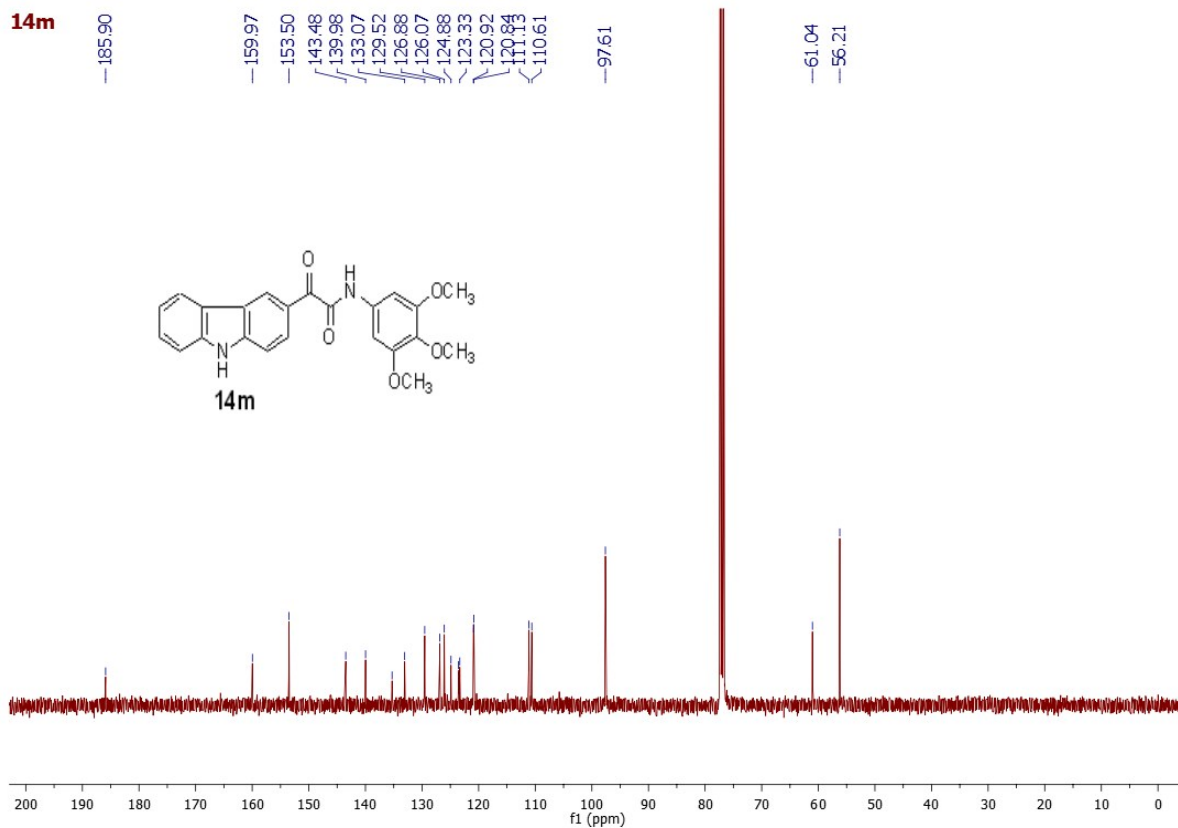

T: FTMS (1,1) + p ESI Full ms [100.00-2000.00]

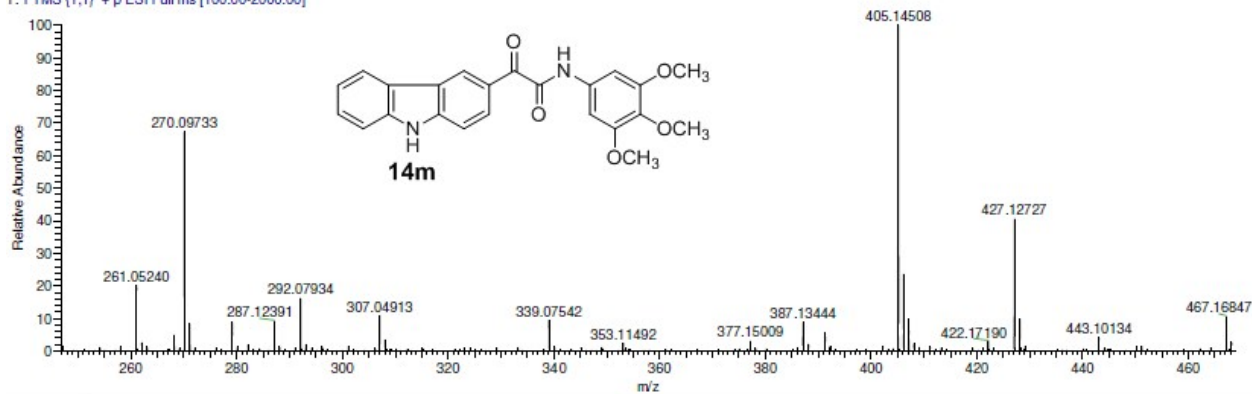

ARP-16#8-30 RT: 0.03-0.11 AV: 23

T: FTMS (1,1) + p ESI Full ms [100.00-2000.00]

m/z = 391.03-411.89

| m/z       | Intensity | Relative | Theo. Mass | Delta (ppm) | RDB equiv. | Composition                                                   |
|-----------|-----------|----------|------------|-------------|------------|---------------------------------------------------------------|
| 405.14506 | 2470315.0 | 100.00   | 405.14450  | 0.56        | 14.5       | C <sub>23</sub> H <sub>21</sub> O <sub>5</sub> N <sub>2</sub> |

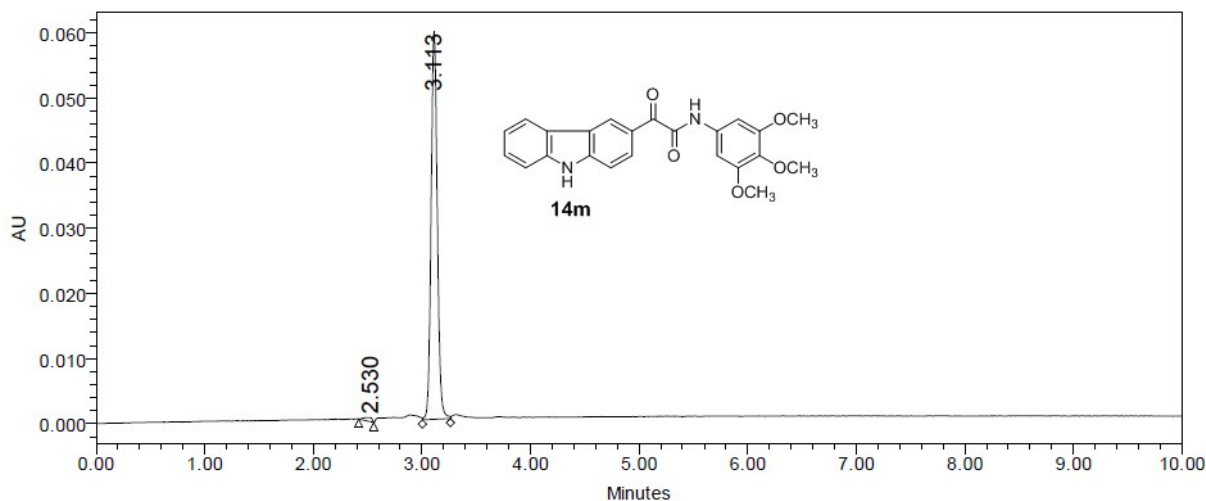

Channel: 2998; Processed Channel: PDA 359.6 nm; Result Id: 4188; Processing Method: cga16

**Processed Channel Descr.: PDA 359.6 nm**

|   | Processed Channel Descr. | RT    | Area   | % Area | Height |
|---|--------------------------|-------|--------|--------|--------|
| 1 | PDA 359.6 nm             | 2.530 | 3056   | 1.28   | 643    |
| 2 | PDA 359.6 nm             | 3.113 | 235993 | 98.72  | 59517  |

14n

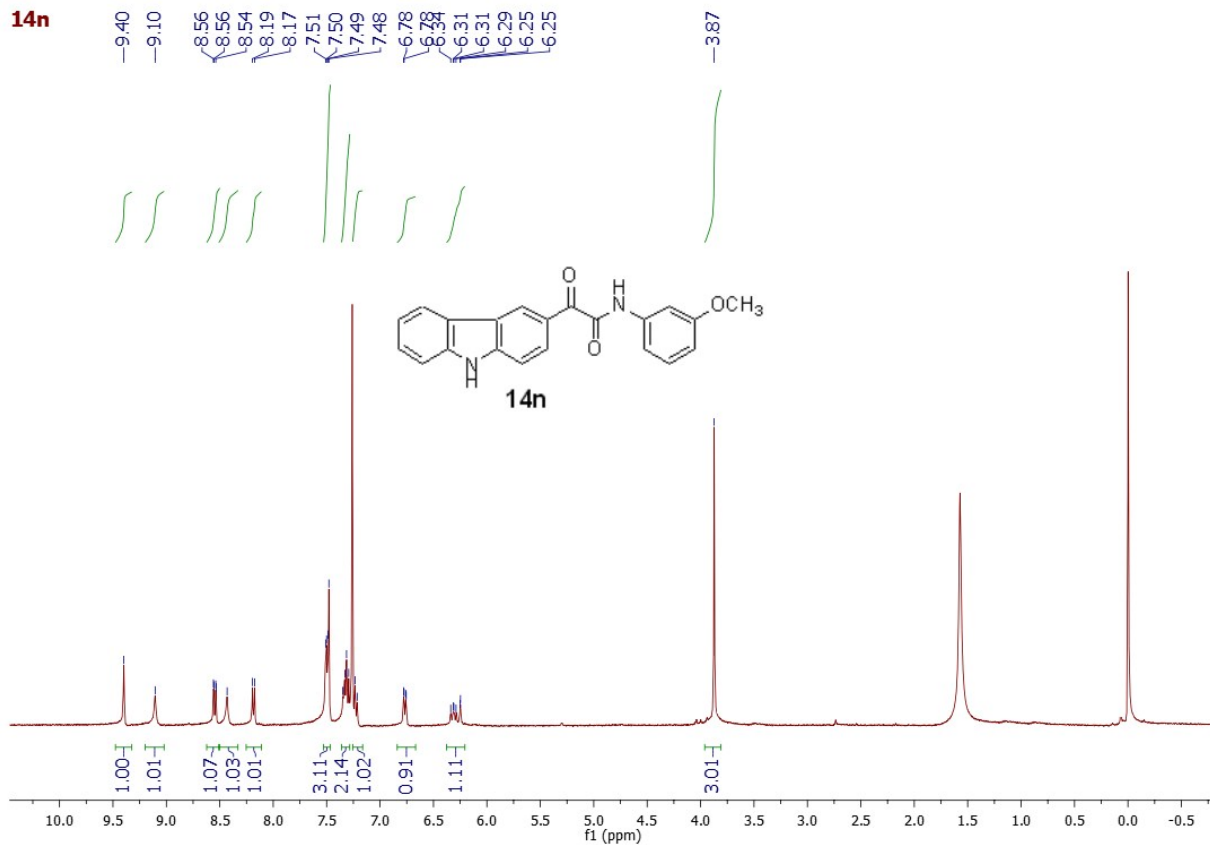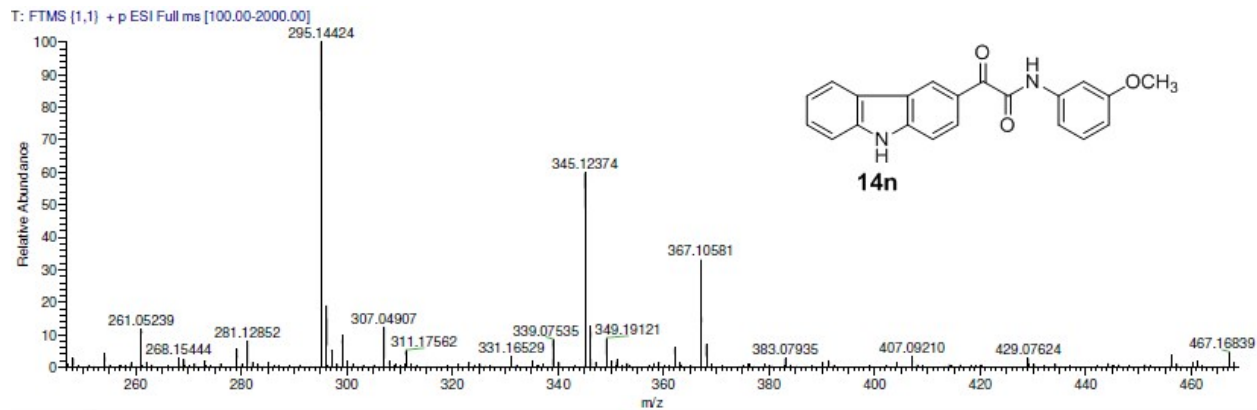

ARP-17#8-30 RT: 0.03-0.11 AV: 23

T: FTMS (1,1) + p ESI Full ms [100.00-2000.00]

m/z = 341.43-351.50

| m/z       | Intensity | Relative | Theo. Mass | Delta (ppm) | RDB equiv. | Composition                                                   |
|-----------|-----------|----------|------------|-------------|------------|---------------------------------------------------------------|
| 345.12369 | 1074506.3 | 100.00   | 345.12337  | 0.33        | 14.5       | C <sub>21</sub> H <sub>17</sub> O <sub>3</sub> N <sub>2</sub> |



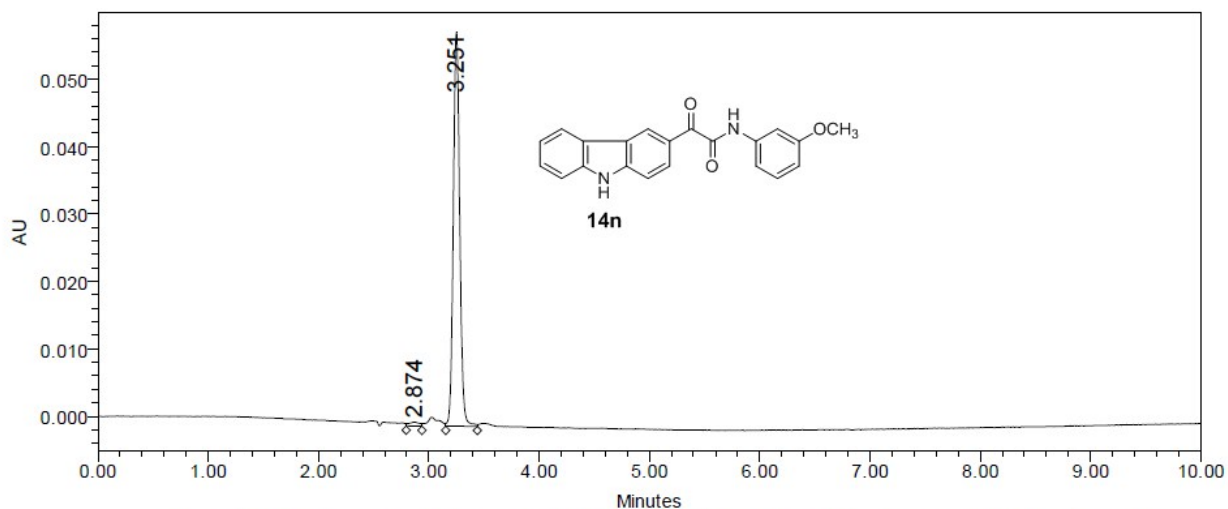

Channel: 2998; Processed Channel: PDA 350.0 nm; Result Id: 4191; Processing Method: cga17

**Processed Channel Descr.: PDA 350.0 nm**

|   | Processed Channel Descr. | RT    | Area   | % Area | Height |
|---|--------------------------|-------|--------|--------|--------|
| 1 | PDA 350.0 nm             | 2.874 | 3905   | 1.63   | 588    |
| 2 | PDA 350.0 nm             | 3.251 | 235584 | 98.37  | 58395  |

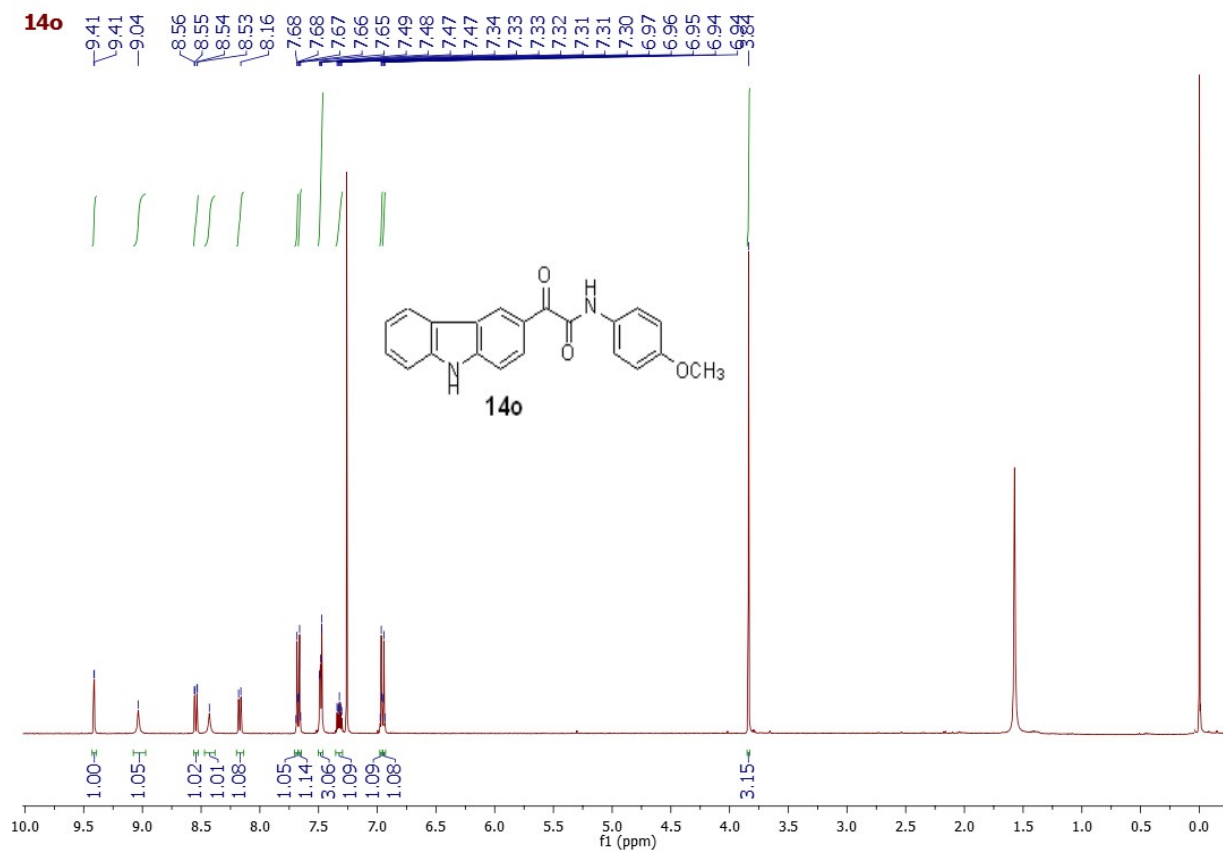

T: FTMS (1,1) + p ESI Full ms [100.00-2000.00]

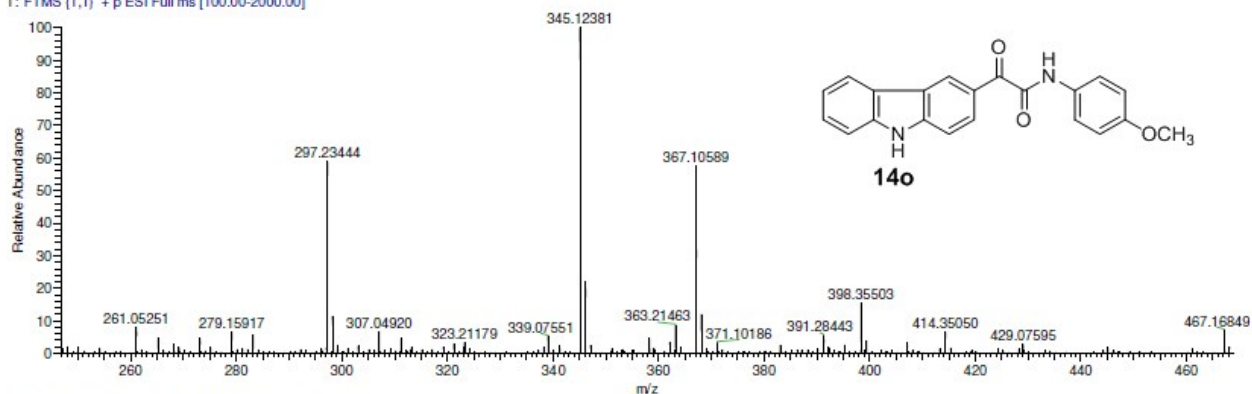

ARP-18#8-30 RT: 0.03-0.11 AV: 23

T: FTMS (1,1) + p ESI Full ms [100.00-2000.00]

m/z = 339.54-352.81

| m/z       | Intensity | Relative | Theo. Mass | Delta (ppm) | RDB equiv. | Composition                                                   |
|-----------|-----------|----------|------------|-------------|------------|---------------------------------------------------------------|
| 345.12382 | 1776299.6 | 100.00   | 345.12337  | 0.45        | 14.5       | C <sub>21</sub> H <sub>17</sub> O <sub>3</sub> N <sub>2</sub> |

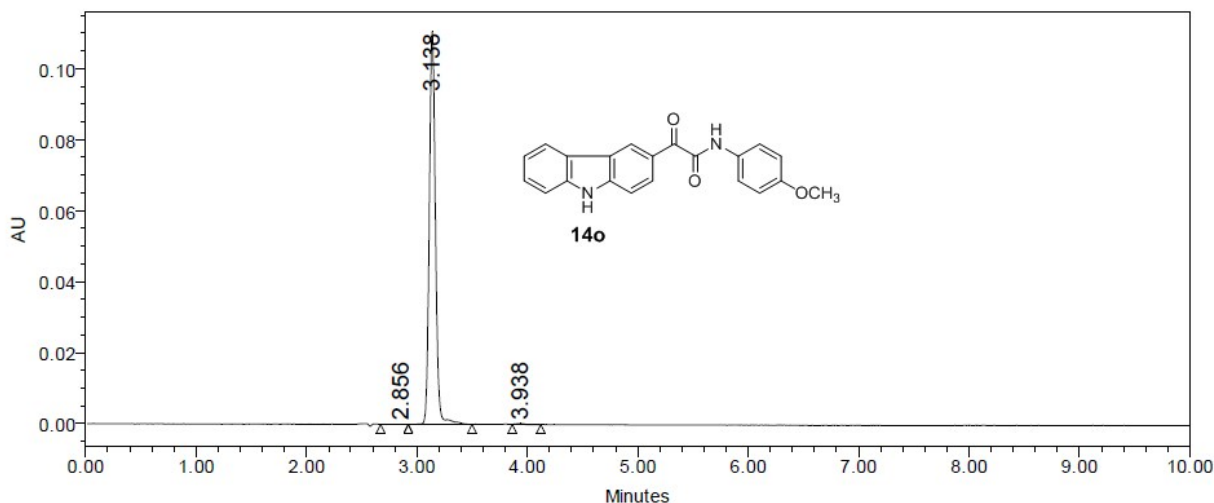

Channel: 2998; Processed Channel: PDA 350.0 nm; Result Id: 4194; Processing Method: cga18

**Processed Channel Descr.: PDA 350.0 nm**

| Processed Channel Descr. | RT    | Area   | % Area | Height |
|--------------------------|-------|--------|--------|--------|
| 1 PDA 350.0 nm           | 2.856 | 362    | 0.08   | 51     |
| 2 PDA 350.0 nm           | 3.138 | 431141 | 99.62  | 110734 |
| 3 PDA 350.0 nm           | 3.938 | 1283   | 0.30   | 235    |

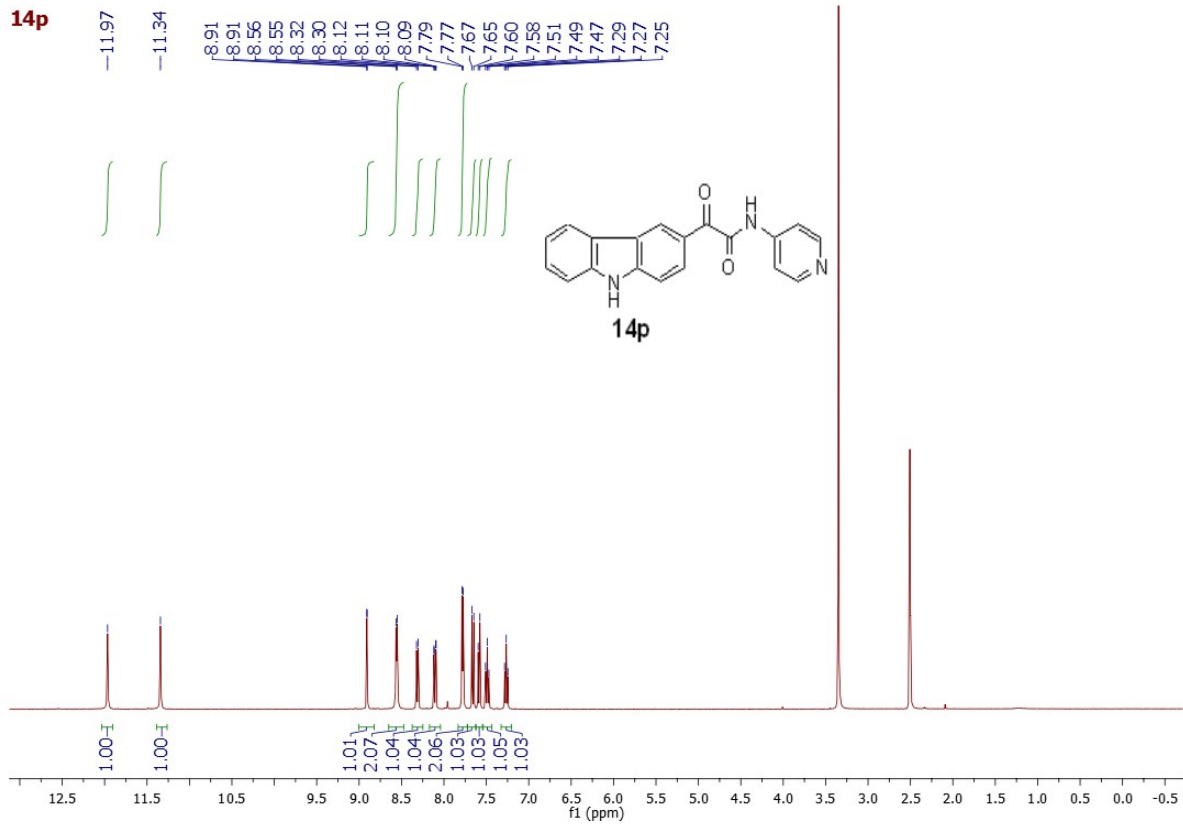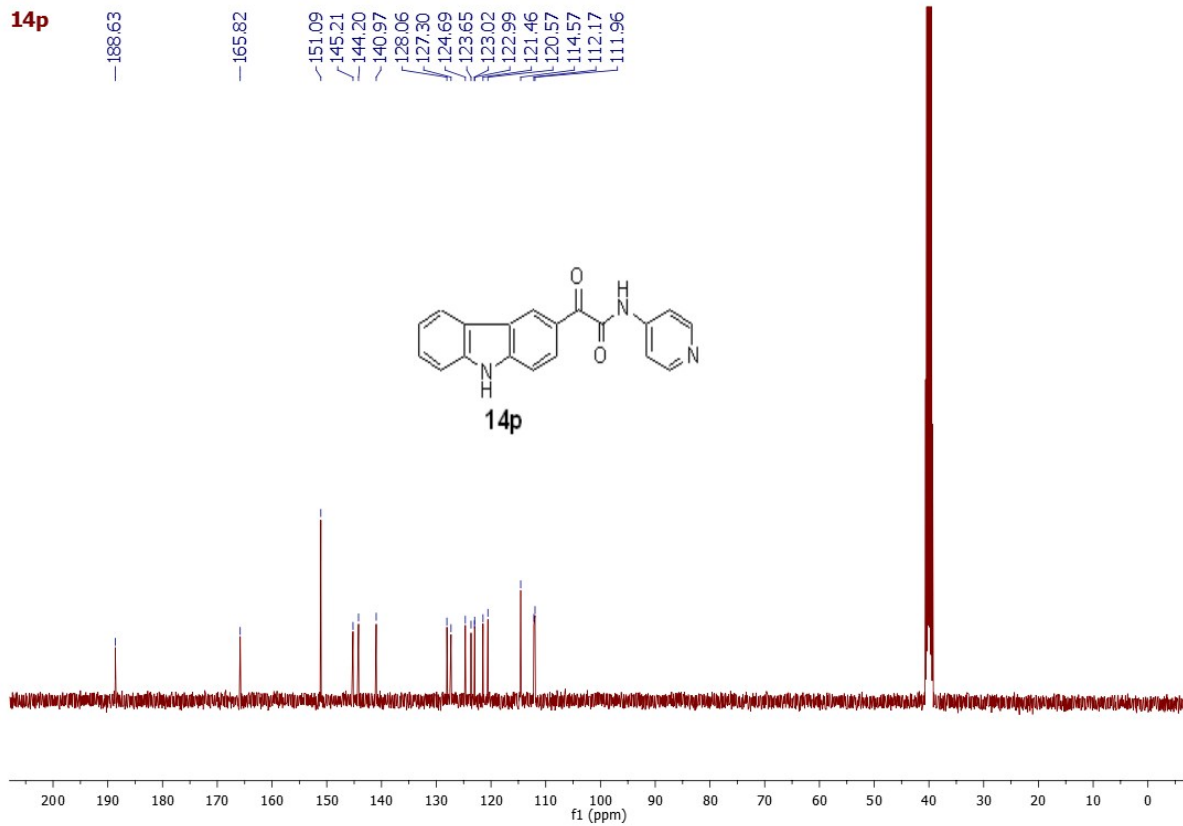

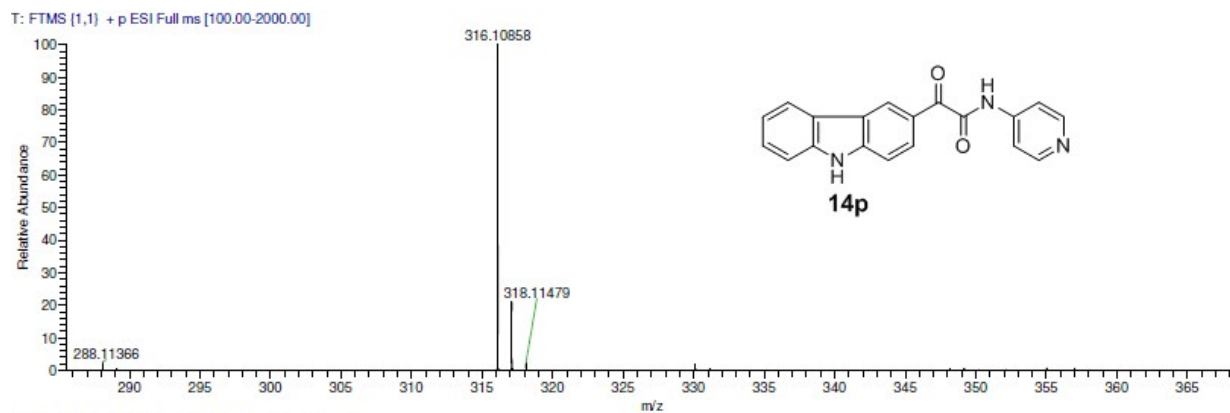

ARP-19#8-30 RT: 0.03-0.11 AV: 23

T: FTMS (1,1) + p ESI Full ms [100.00-2000.00]

m/z= 308.48-335.55

| m/z       | Intensity  | Relative | Theo. Mass | Delta (ppm) | RDB equiv. | Composition                                                   |
|-----------|------------|----------|------------|-------------|------------|---------------------------------------------------------------|
| 316.10857 | 41230760.0 | 100.00   | 316.10805  | 0.52        | 14.5       | C <sub>19</sub> H <sub>14</sub> O <sub>2</sub> N <sub>3</sub> |

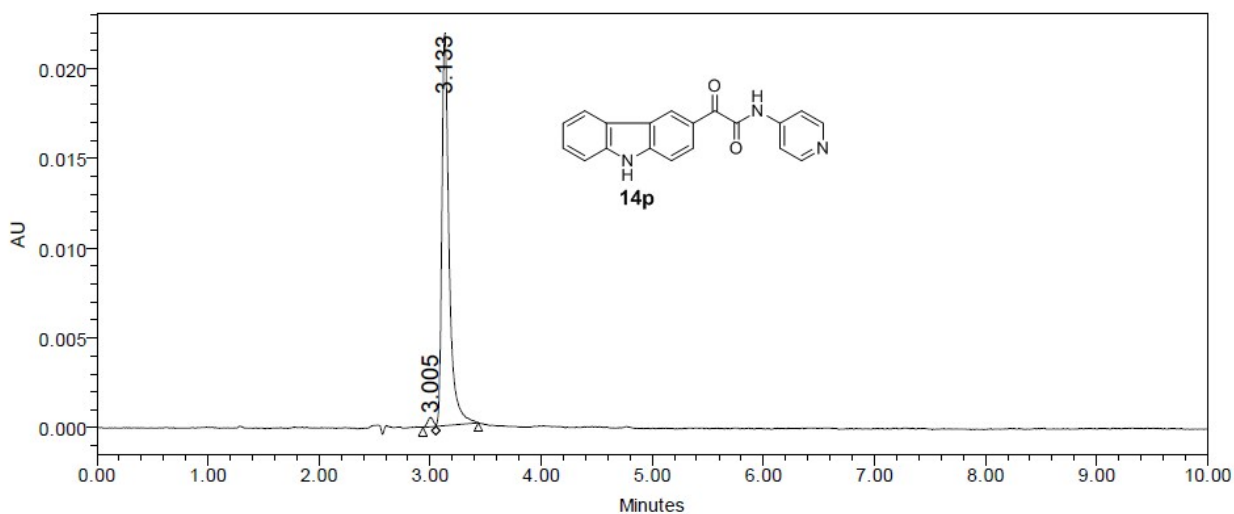

Channel: 2998; Processed Channel: PDA 303.0 nm; Result Id: 4200; Processing Method: cga19

**Processed Channel Descr.: PDA  
303.0 nm**

|   | Processed Channel Descr. | RT    | Area  | % Area | Height |
|---|--------------------------|-------|-------|--------|--------|
| 1 | PDA 303.0 nm             | 3.005 | 1898  | 1.88   | 531    |
| 2 | PDA 303.0 nm             | 3.133 | 99142 | 98.12  | 21853  |

14q

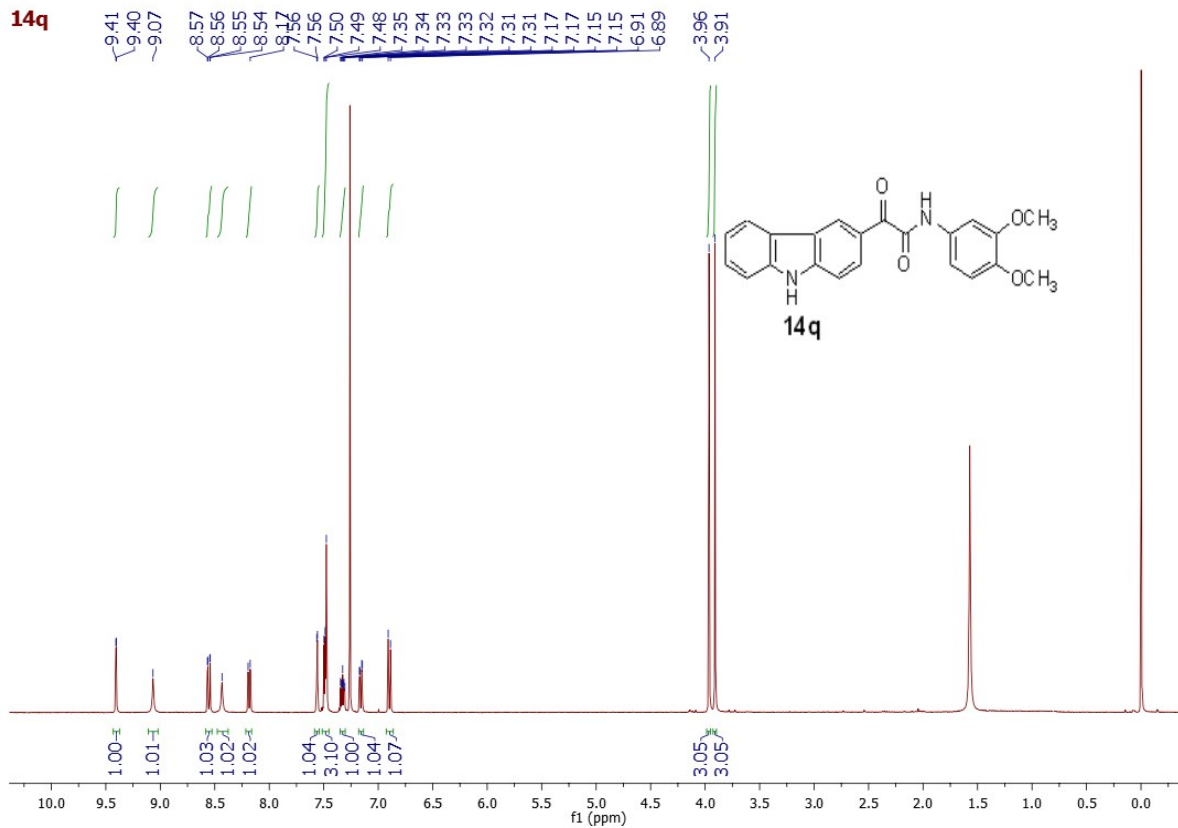

14q

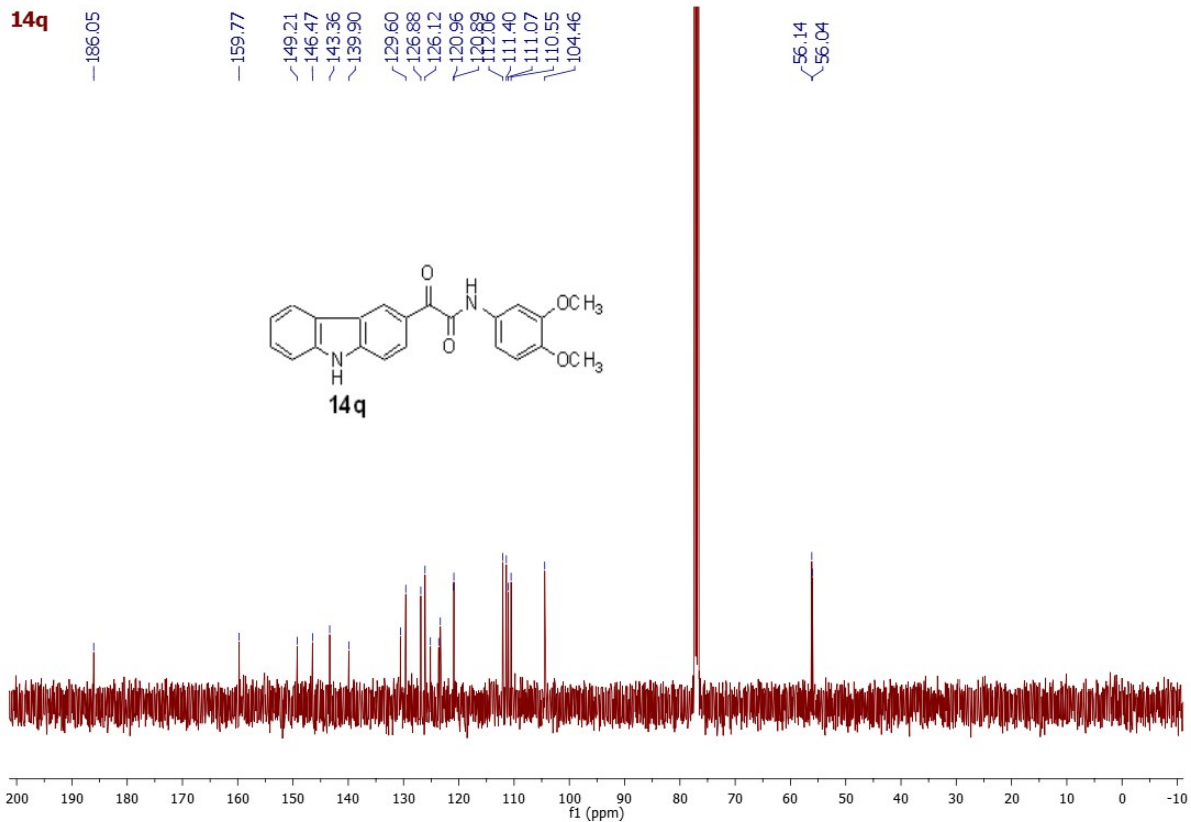

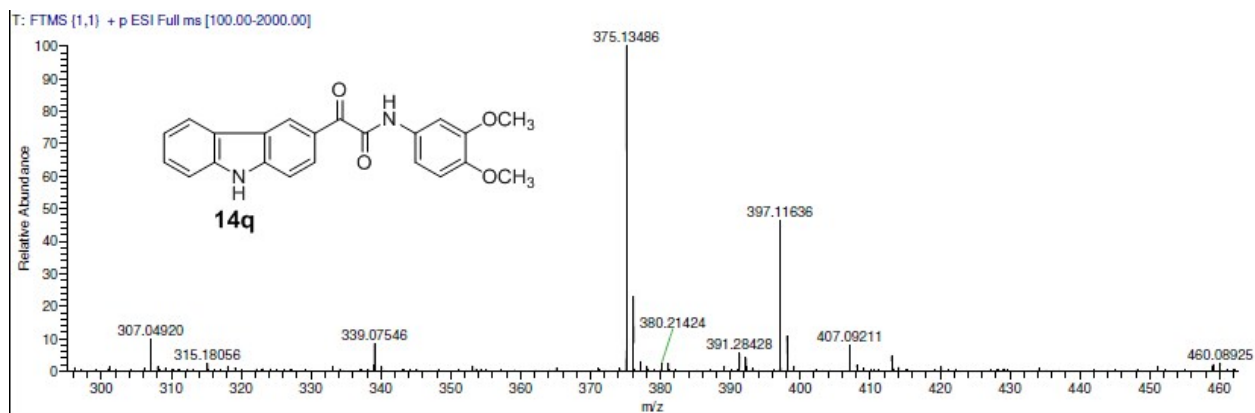

ARP-20#8-30 RT: 0.03-0.11 AV: 23

T: FTMS (1,1) + p ESI Full ms [100.00-2000.00]

m/z= 367.47-379.57

| m/z       | Intensity | Relative | Theo. Mass | Delta (ppm) | RDB equiv. | Composition                                                   |
|-----------|-----------|----------|------------|-------------|------------|---------------------------------------------------------------|
| 375.13482 | 2546129.5 | 100.00   | 375.13393  | 0.89        | 14.5       | C <sub>22</sub> H <sub>19</sub> O <sub>4</sub> N <sub>2</sub> |

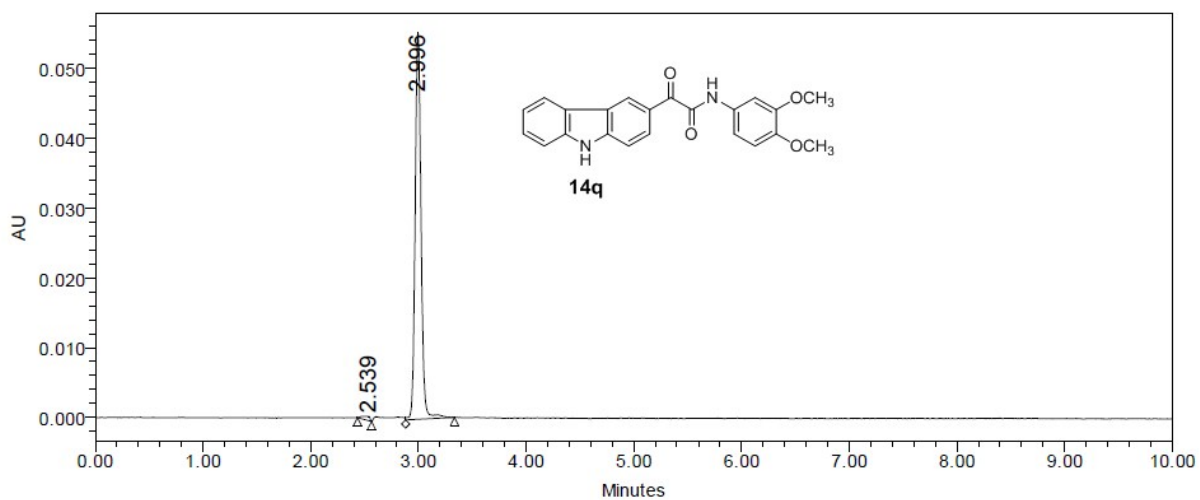

Channel: 2998; Processed Channel: PDA 350.0 nm; Result Id: 4197; Processing Method: cga20

**Processed Channel Descr.: PDA 350.0 nm**

|   | Processed Channel Descr. | RT    | Area   | % Area | Height |
|---|--------------------------|-------|--------|--------|--------|
| 1 | PDA 350.0 nm             | 2.539 | 2873   | 1.34   | 614    |
| 2 | PDA 350.0 nm             | 2.996 | 210926 | 98.66  | 55398  |

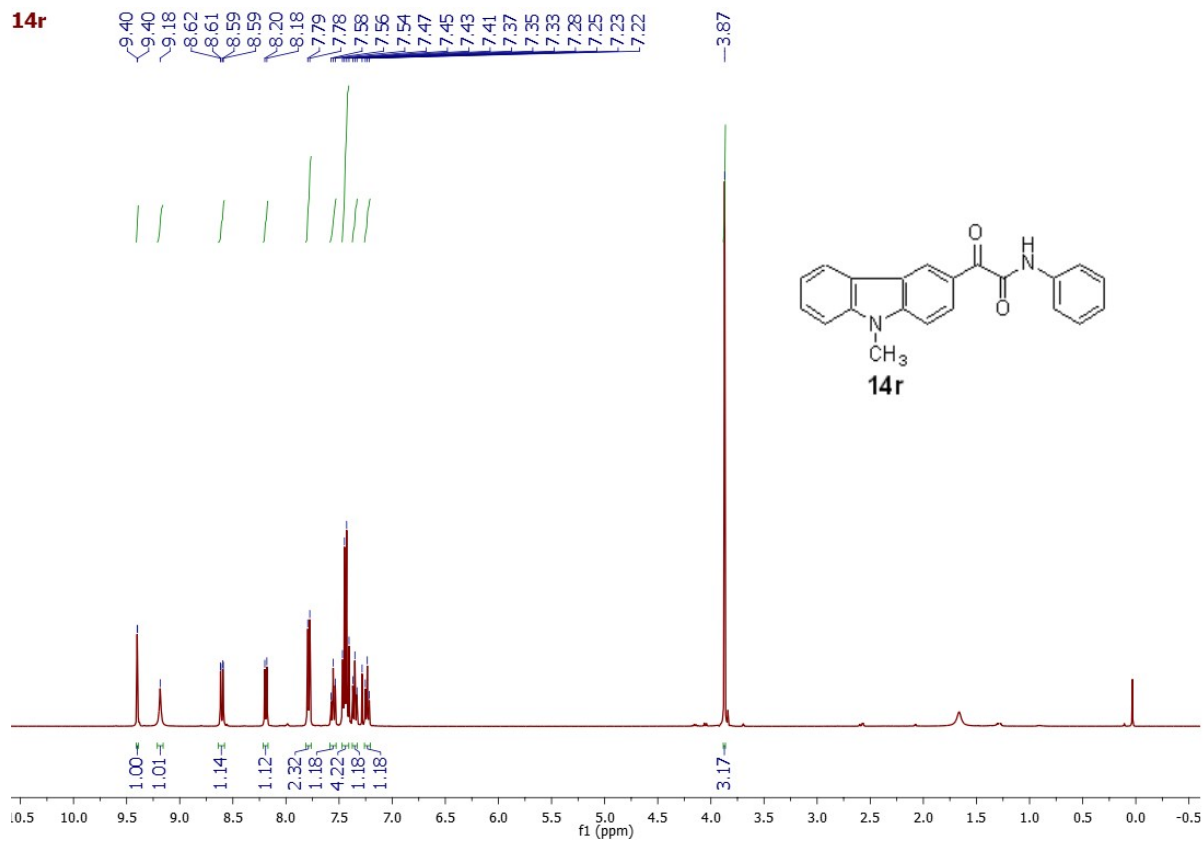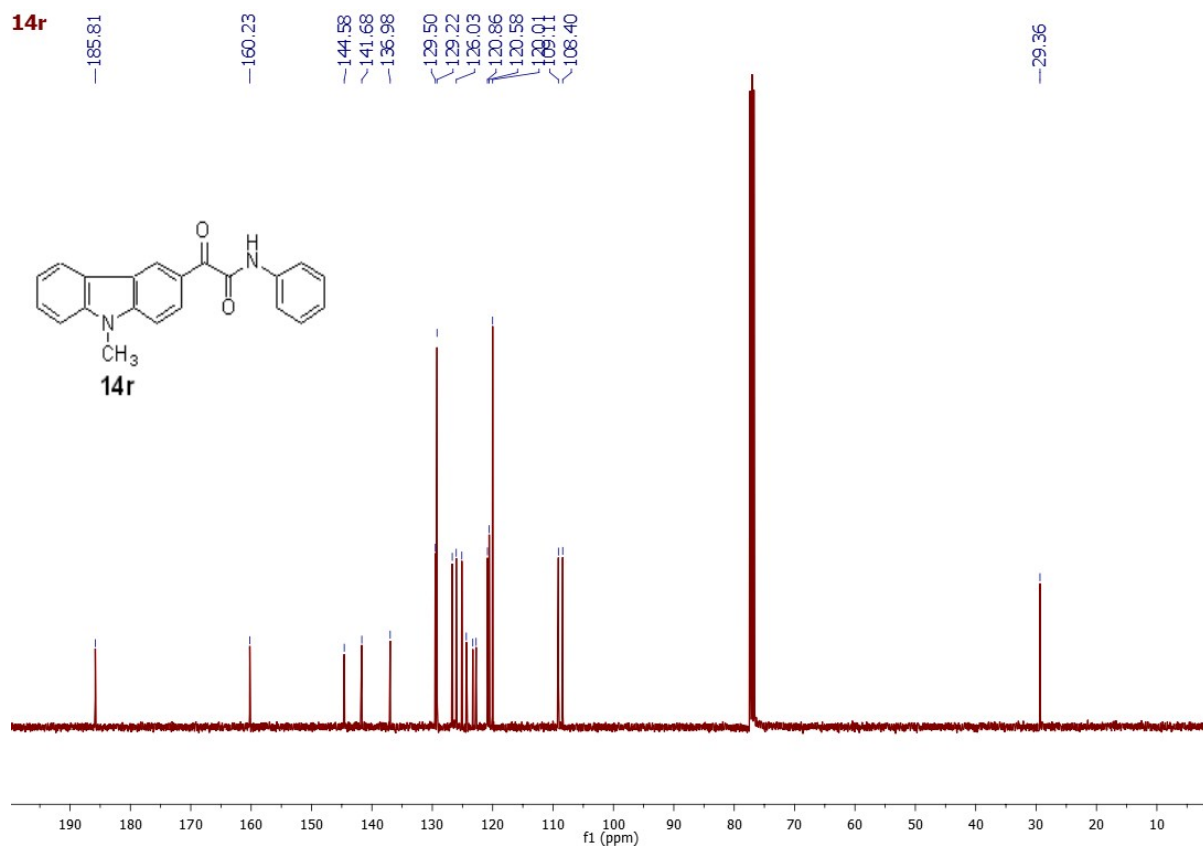

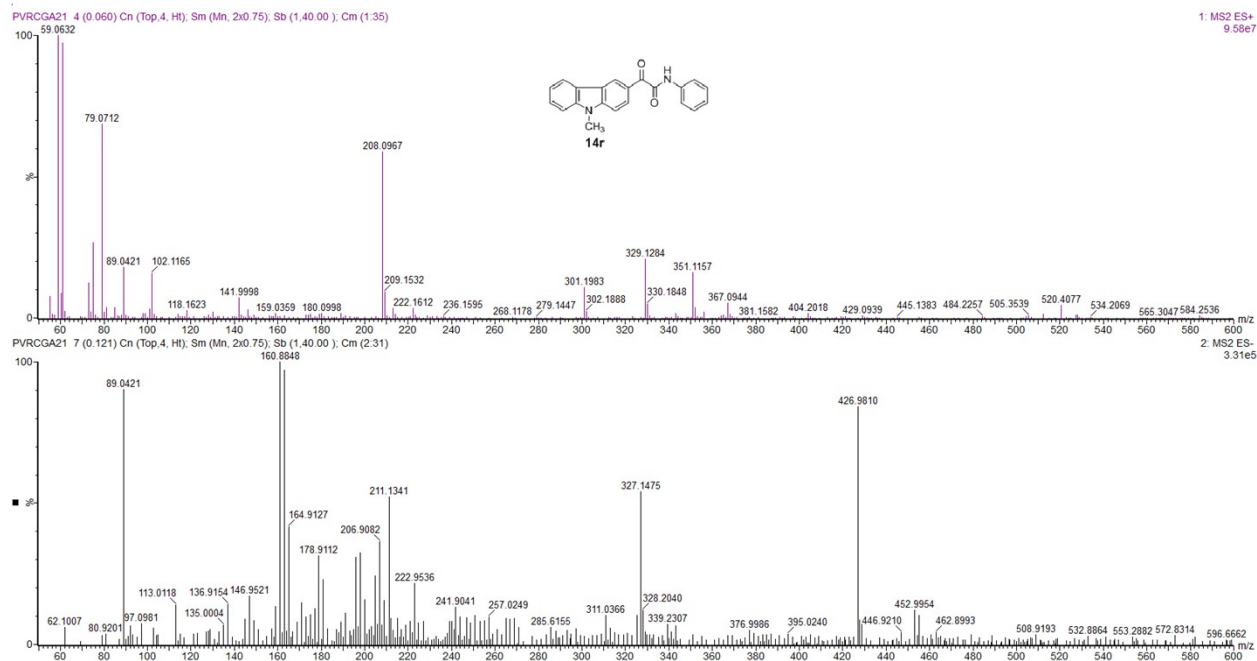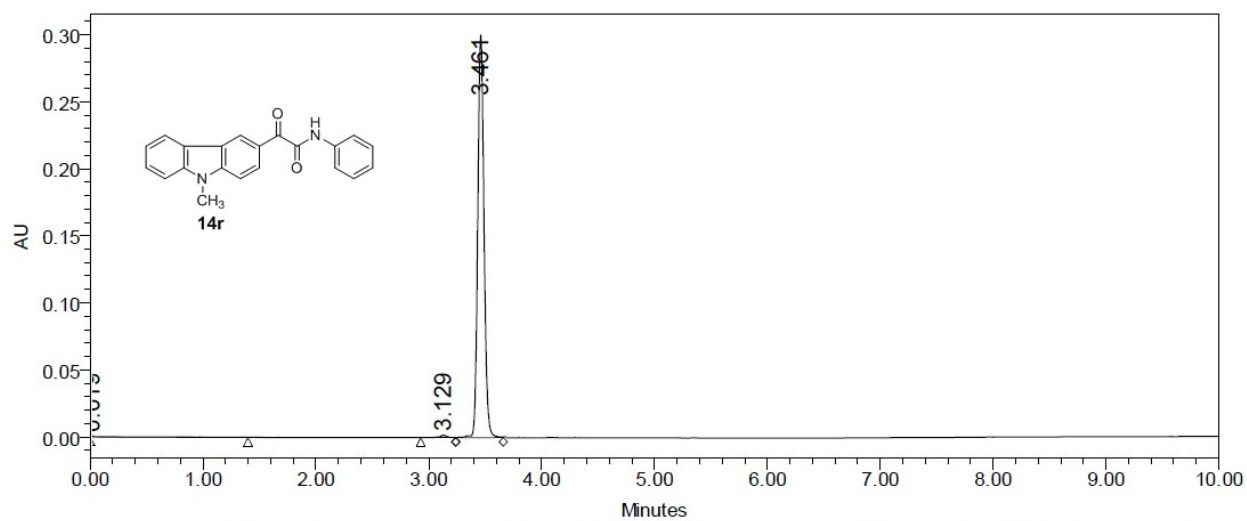

Channel: 2998; Processed Channel: PDA 327.7 nm; Result Id: 1106; Processing Method: pvrcca21

**Processed Channel Descr.: PDA 327.7 nm**

|   | Processed Channel Descr. | RT    | Area    | % Area | Height |
|---|--------------------------|-------|---------|--------|--------|
| 1 | PDA 327.7 nm             | 0.019 | 6873    | 0.59   | 829    |
| 2 | PDA 327.7 nm             | 3.129 | 7616    | 0.65   | 1804   |
| 3 | PDA 327.7 nm             | 3.461 | 1152191 | 98.76  | 300392 |



14s

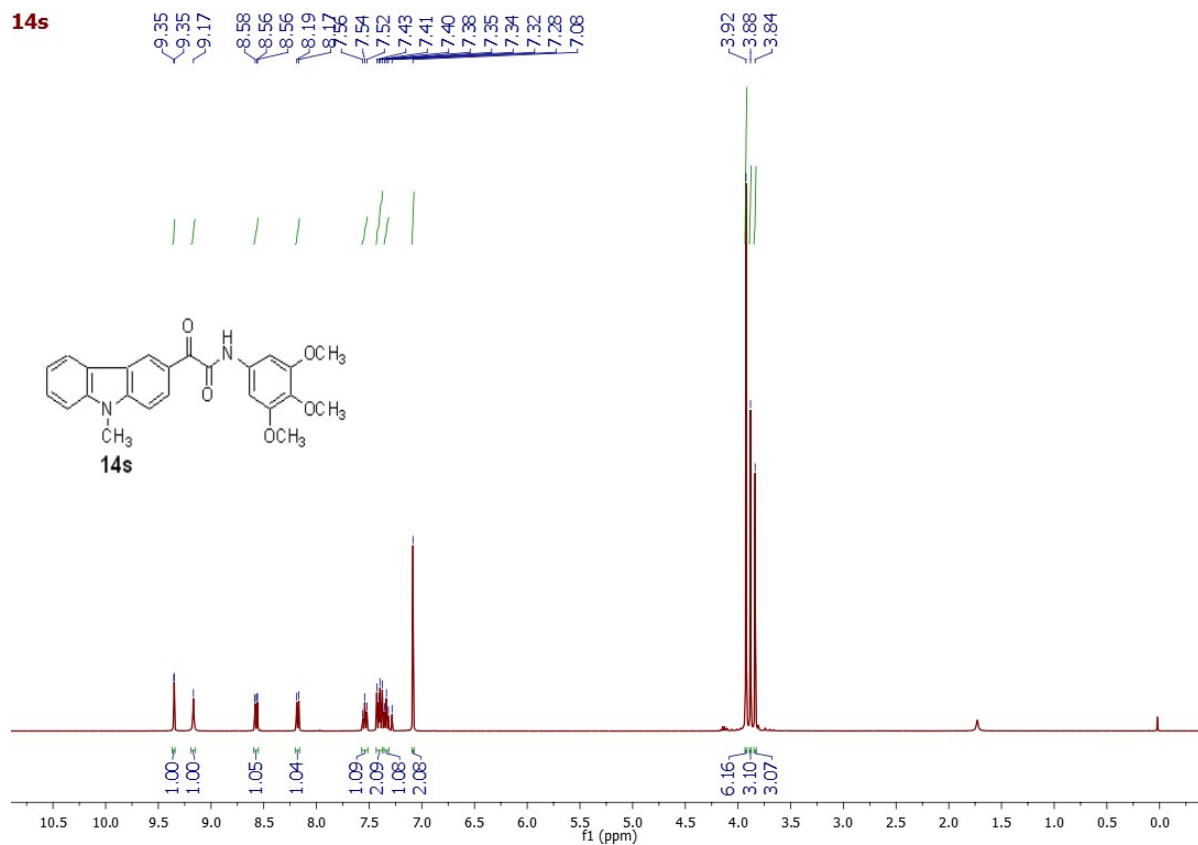

14s

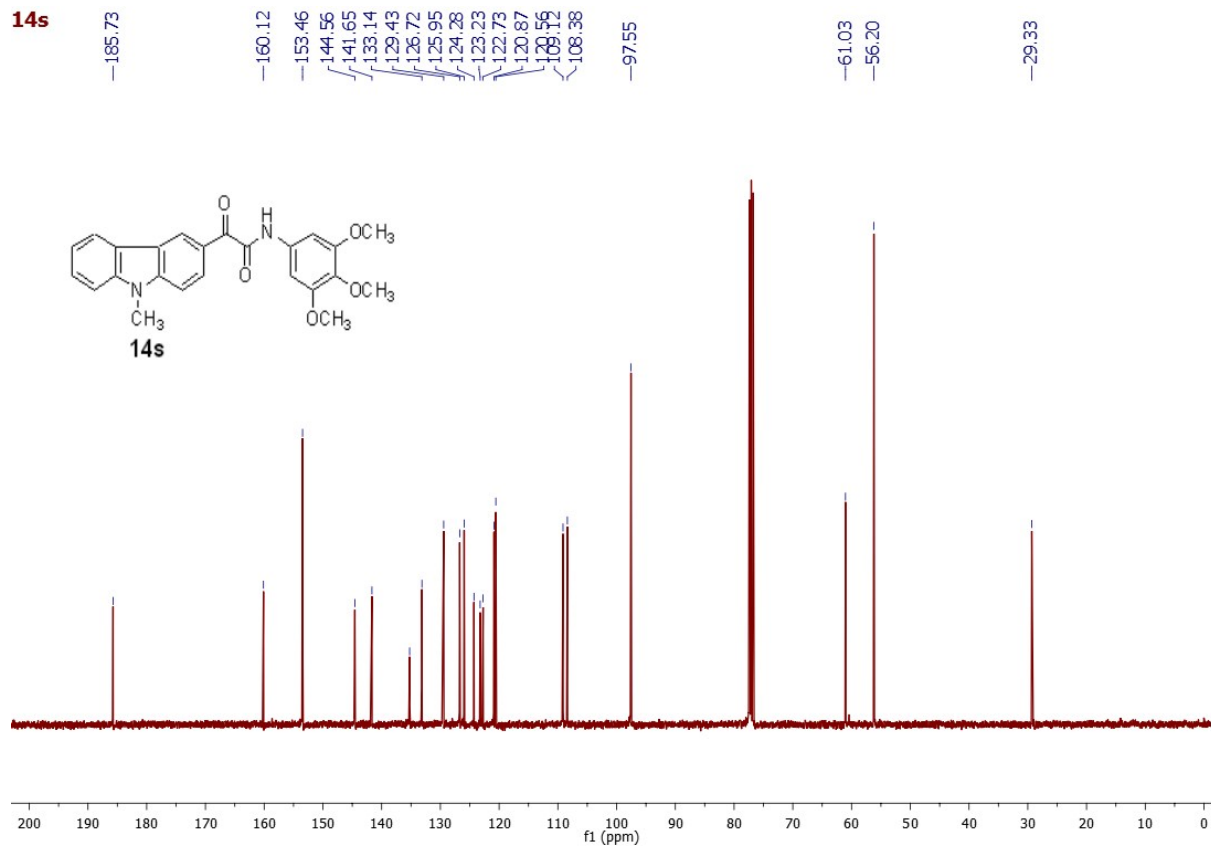

PVRCGA22 7 (0.121) Cn (Top.4. Ht), Sm (Mn. 2x0.75), Sb (1.40.00 ), Cm (2.32)

2: MS2 ES-  
2.0366

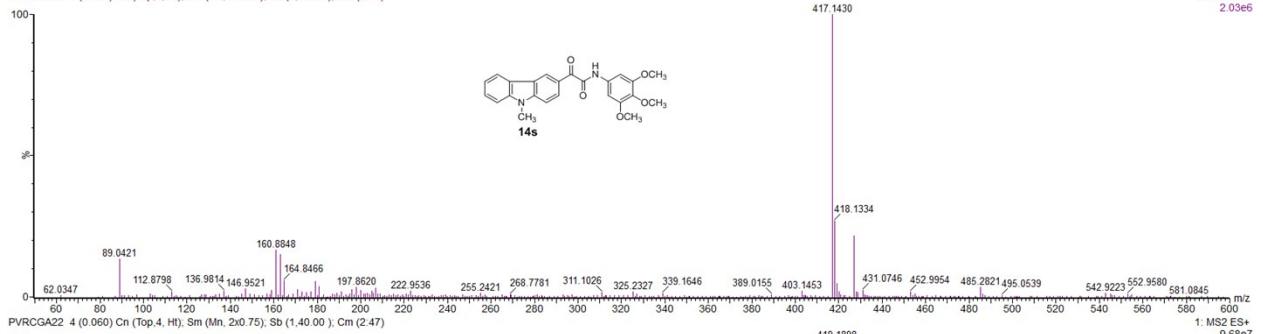

PVRCGA22 4 (0.060) Cn (Top.4. Ht), Sm (Mn. 2x0.75), Sb (1.40.00 ), Cm (2.47)

1: MS2 ES+  
9.68e7

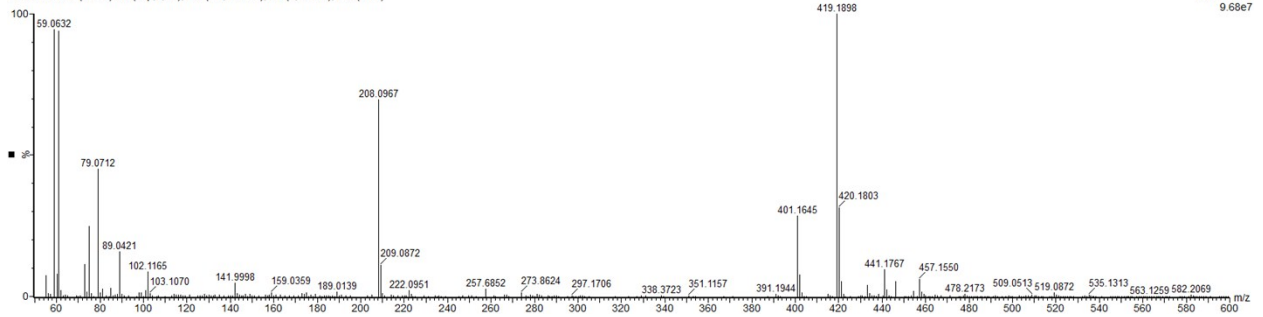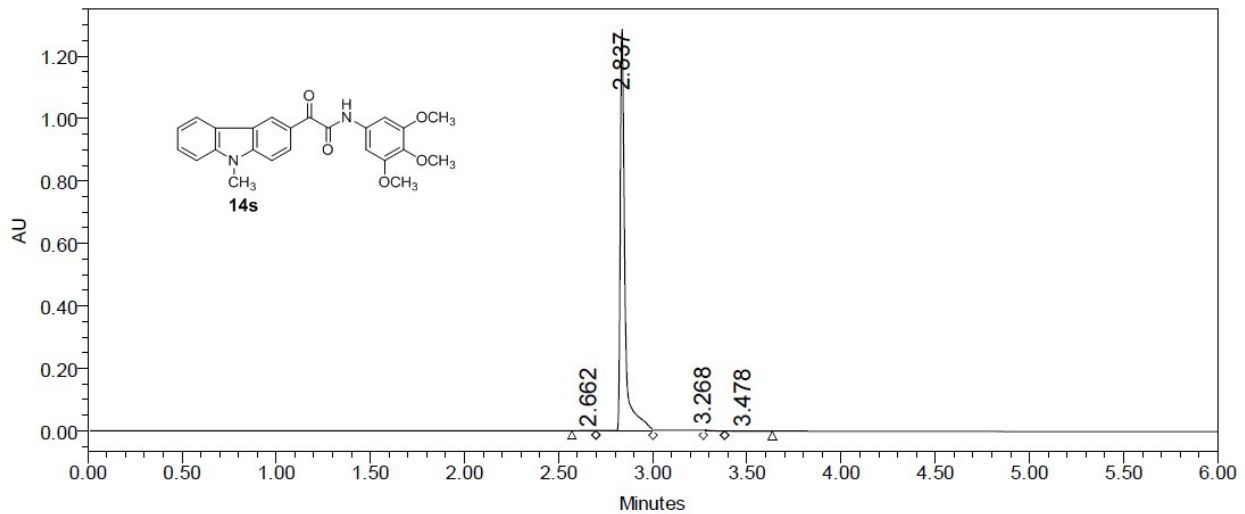

Channel: 2998; Processed Channel: PDA 301.6 nm; Result Id: 1103; Processing Method: PVRCGA 22b

**Processed Channel Descr.: PDA 301.6 nm**

|   | Processed Channel Descr. | RT    | Area    | % Area | Height  |
|---|--------------------------|-------|---------|--------|---------|
| 1 | PDA 301.6 nm             | 2.662 | 2652    | 0.12   | 743     |
| 2 | PDA 301.6 nm             | 2.837 | 2240394 | 99.34  | 1285205 |
| 3 | PDA 301.6 nm             | 3.268 | 8284    | 0.37   | 5638    |
| 4 | PDA 301.6 nm             | 3.478 | 3848    | 0.17   | 601     |

14t

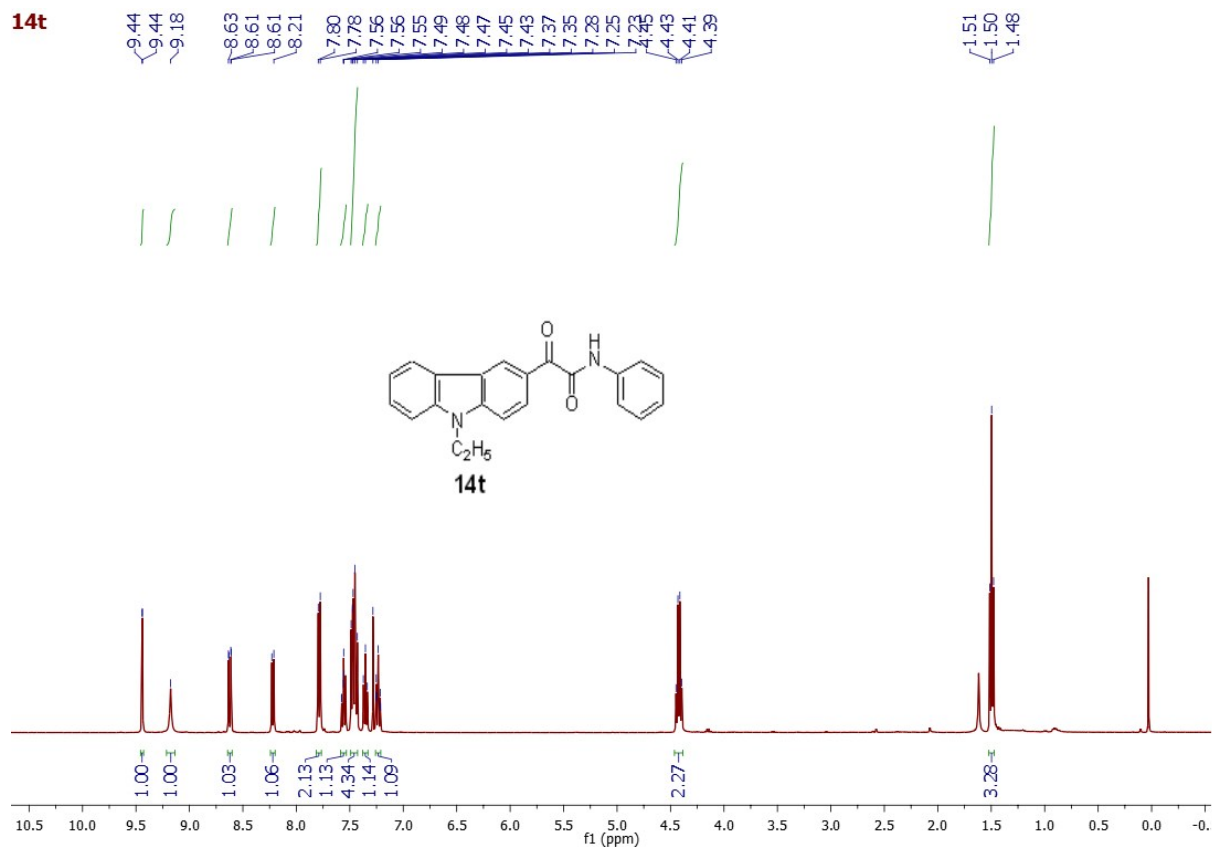

14t

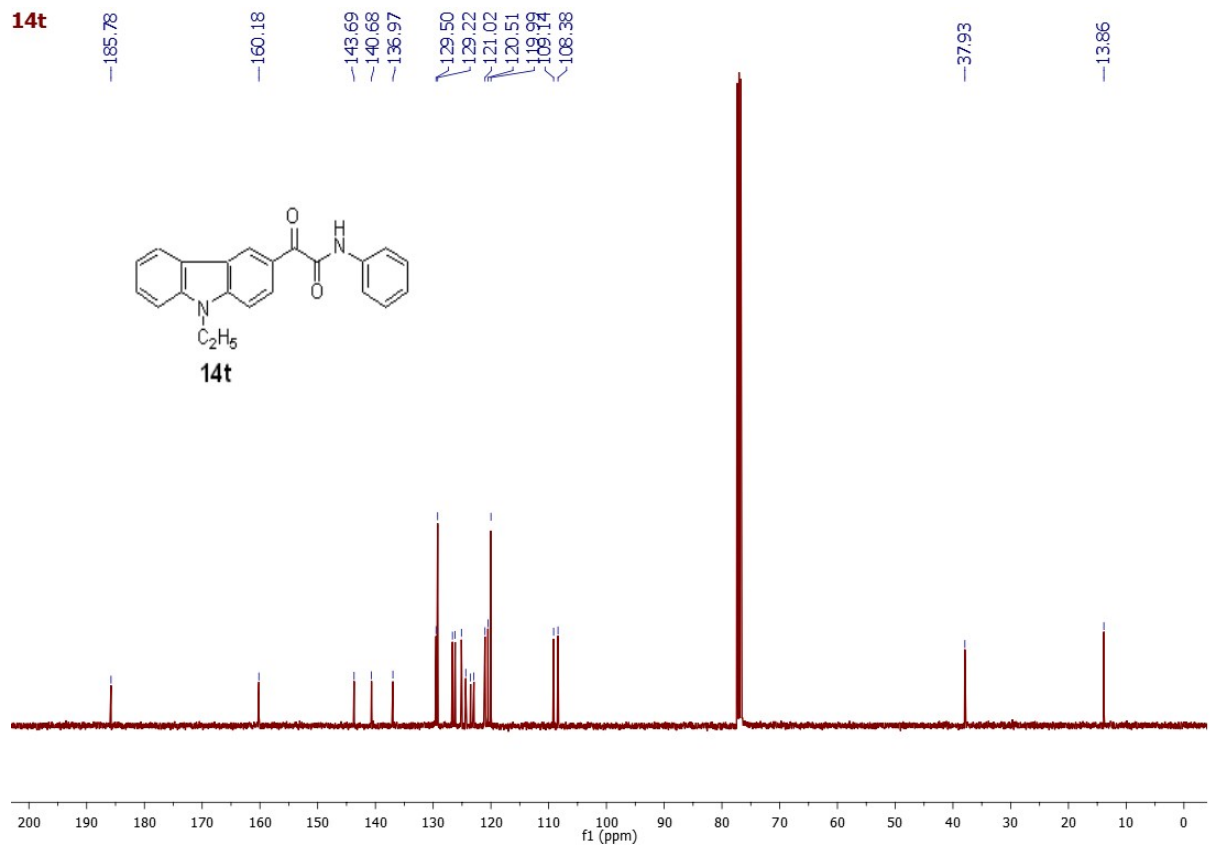

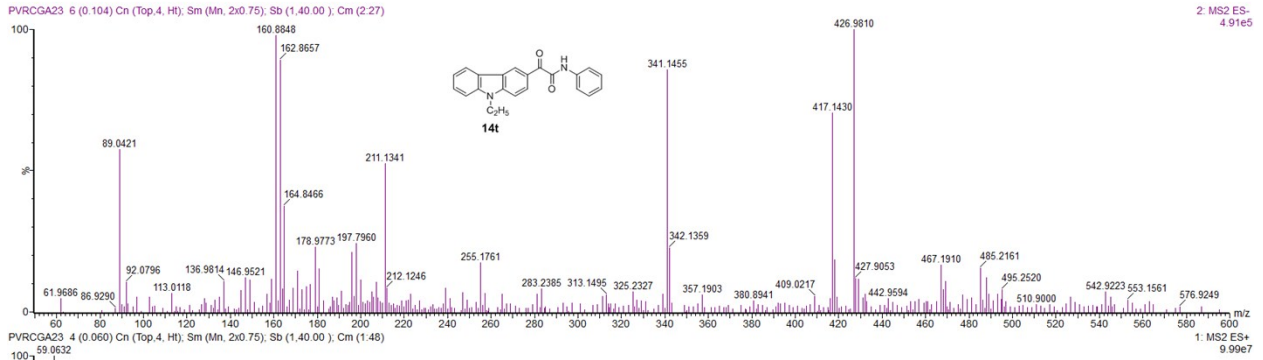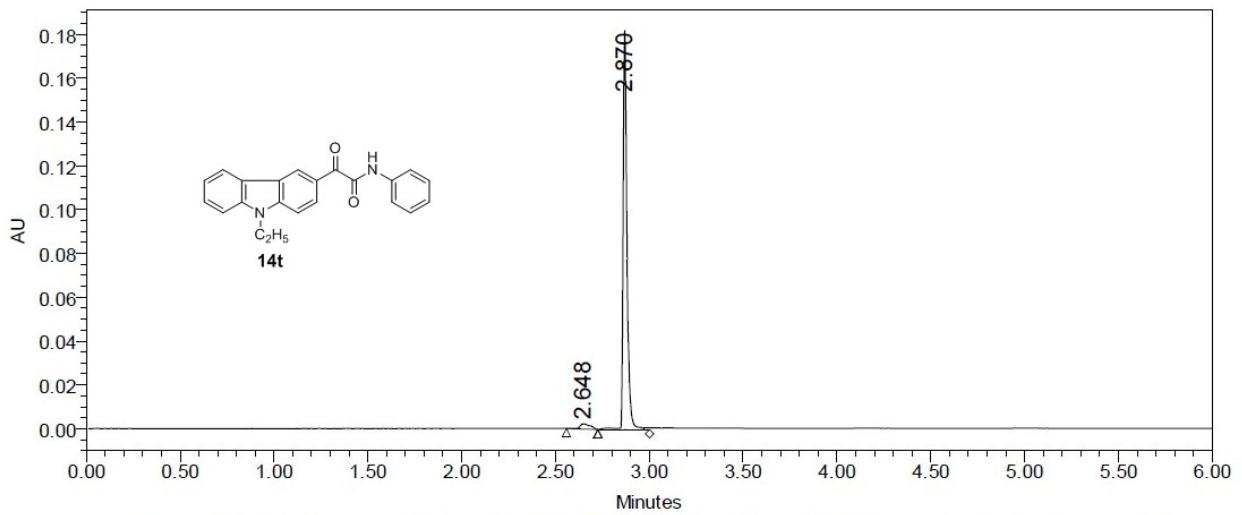

Channel: 2998; Processed Channel: PDA 327.7 nm; Result Id: 1269; Processing Method: pvrcga23a

**Processed Channel Descr.: PDA 327.7  
nm**

|   | Processed Channel Descr. | RT    | Area   | % Area | Height |
|---|--------------------------|-------|--------|--------|--------|
| 1 | PDA 327.7 nm             | 2.648 | 9252   | 1.26   | 2411   |
| 2 | PDA 327.7 nm             | 2.870 | 725065 | 98.74  | 182260 |

**14u**

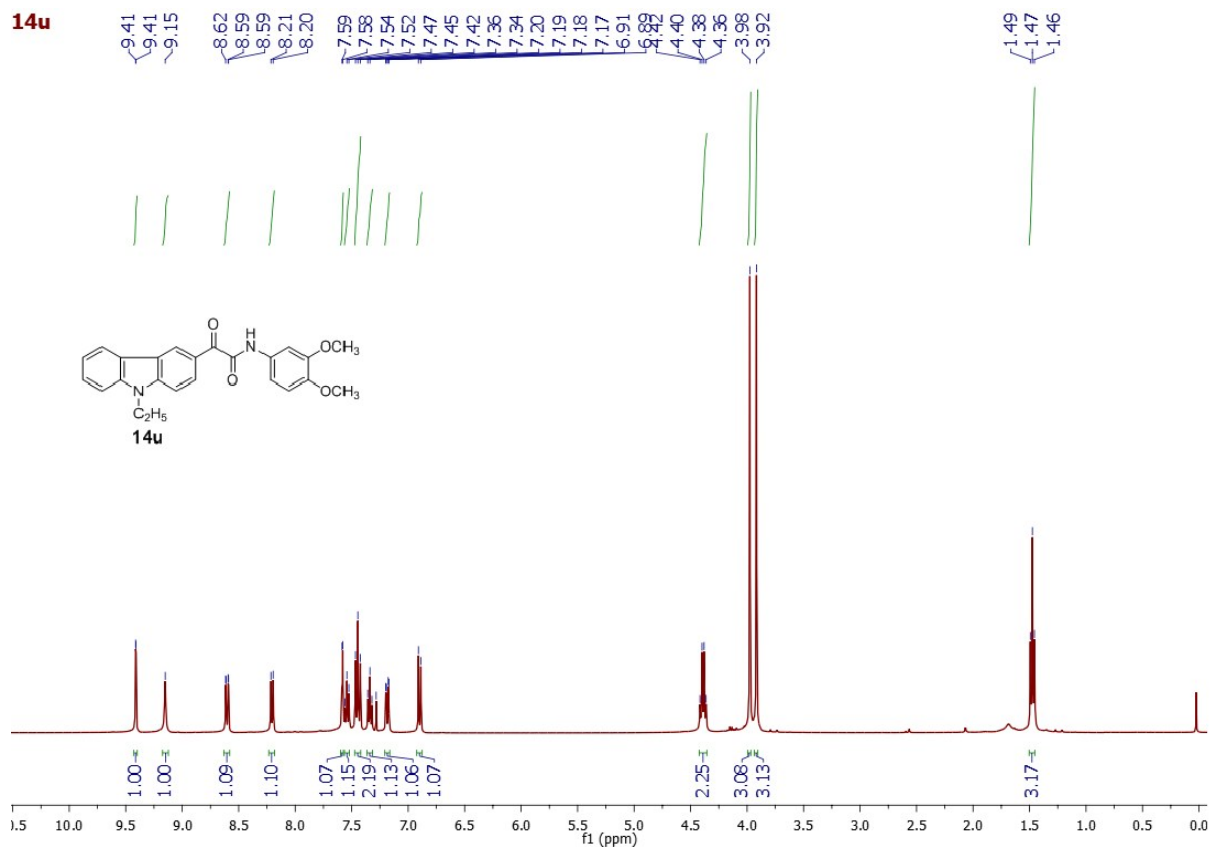

**14u**

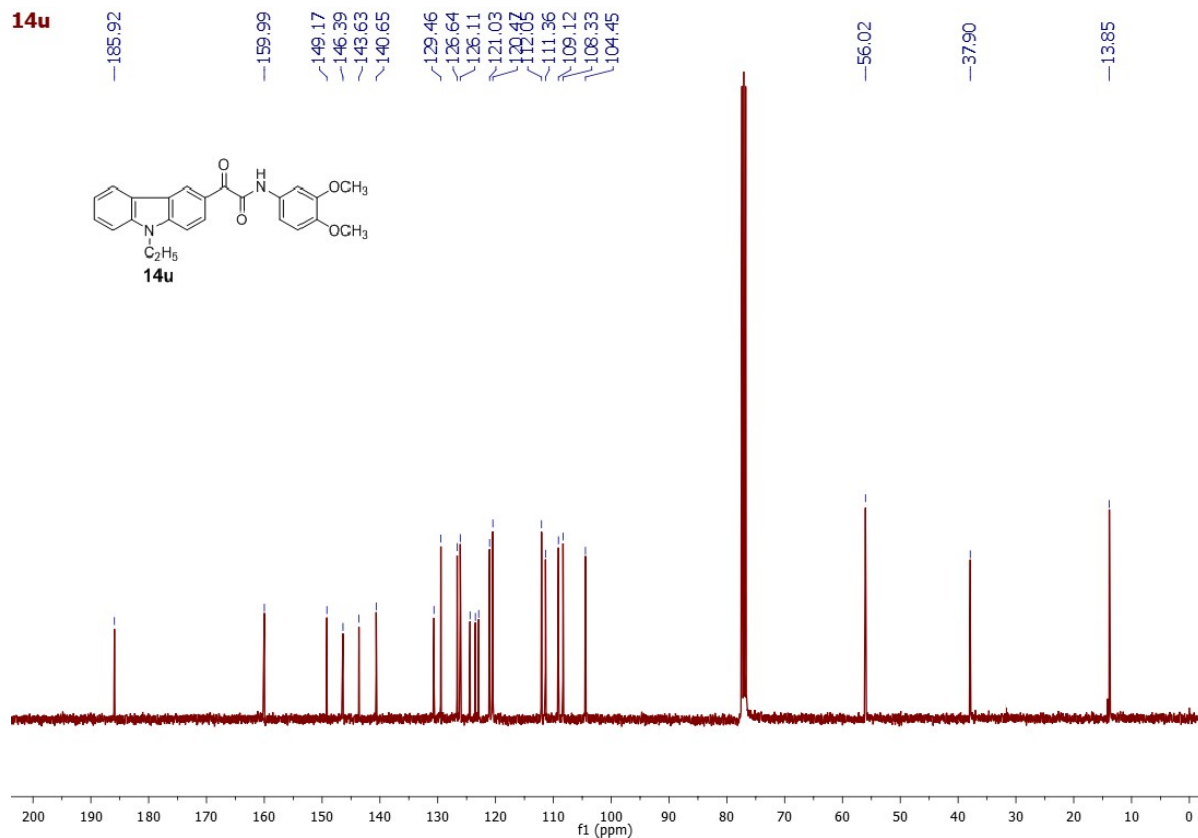

PVRCGA24 5 (0.086) Cn (Top.4, Ht), Sm (Mn. 2x0.75), Sb (1.40.00), Cm (1.38)

2: MS2 ES-  
5.07e5

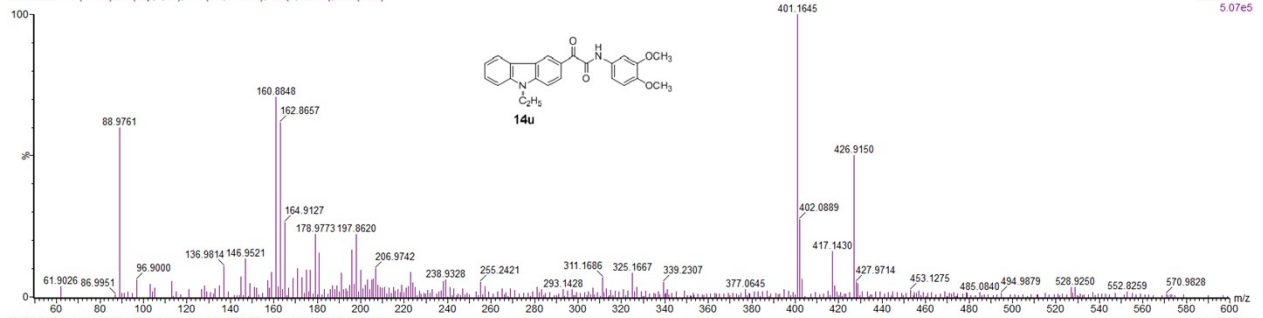

PVRCGA24 4 (0.060) Cn (Top.4, Ht), Sm (Mn. 2x0.75), Sb (1.40.00), Cm (3.45)

1: MS2 ES+  
9.75e7

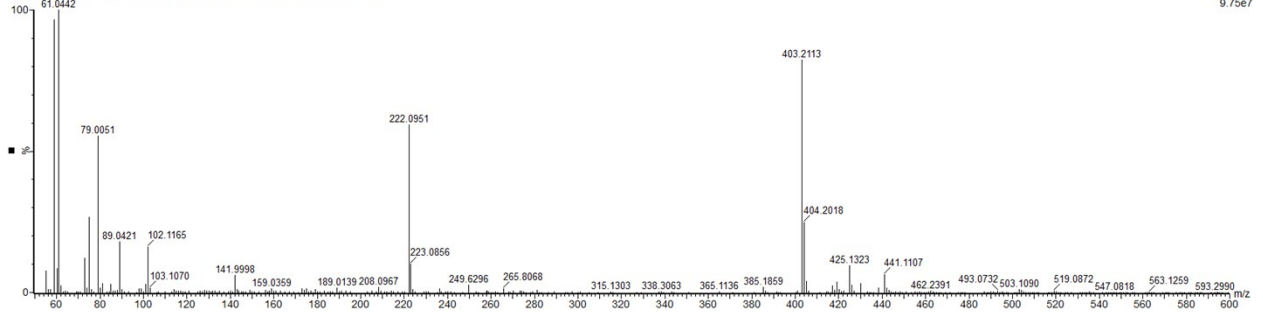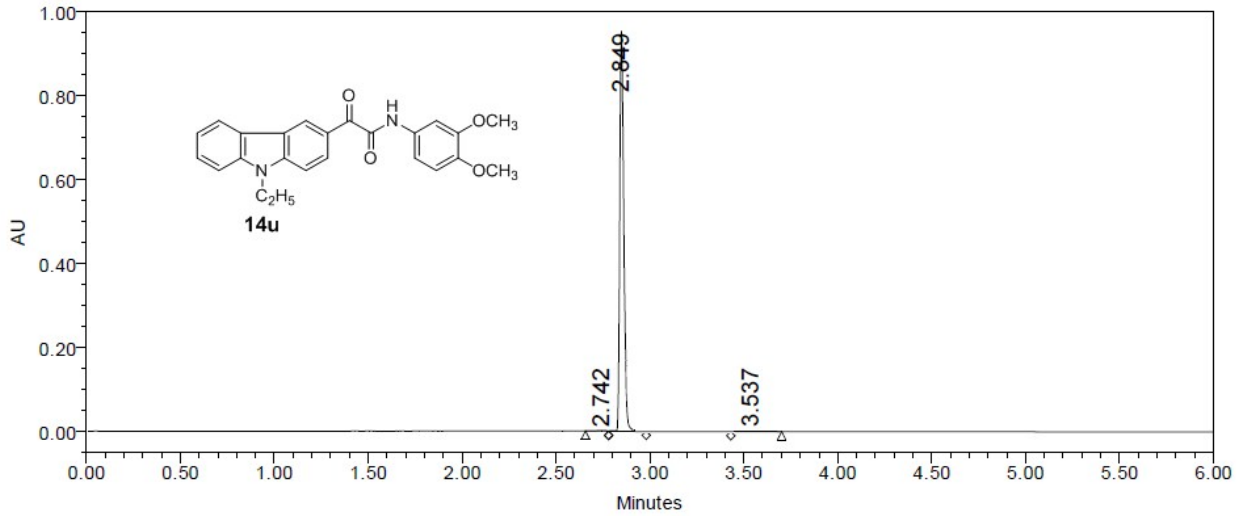

Channel: 2998; Processed Channel: PDA 311.7 nm; Result Id: 1188; Processing Method: pvrca24

**Processed Channel Descr.: PDA 311.7  
nm**

|   | Processed Channel Descr. | RT    | Area    | % Area | Height |
|---|--------------------------|-------|---------|--------|--------|
| 1 | PDA 311.7 nm             | 2.742 | 2652    | 0.16   | 703    |
| 2 | PDA 311.7 nm             | 2.849 | 1630950 | 99.51  | 952856 |
| 3 | PDA 311.7 nm             | 3.537 | 5356    | 0.33   | 1029   |

14v

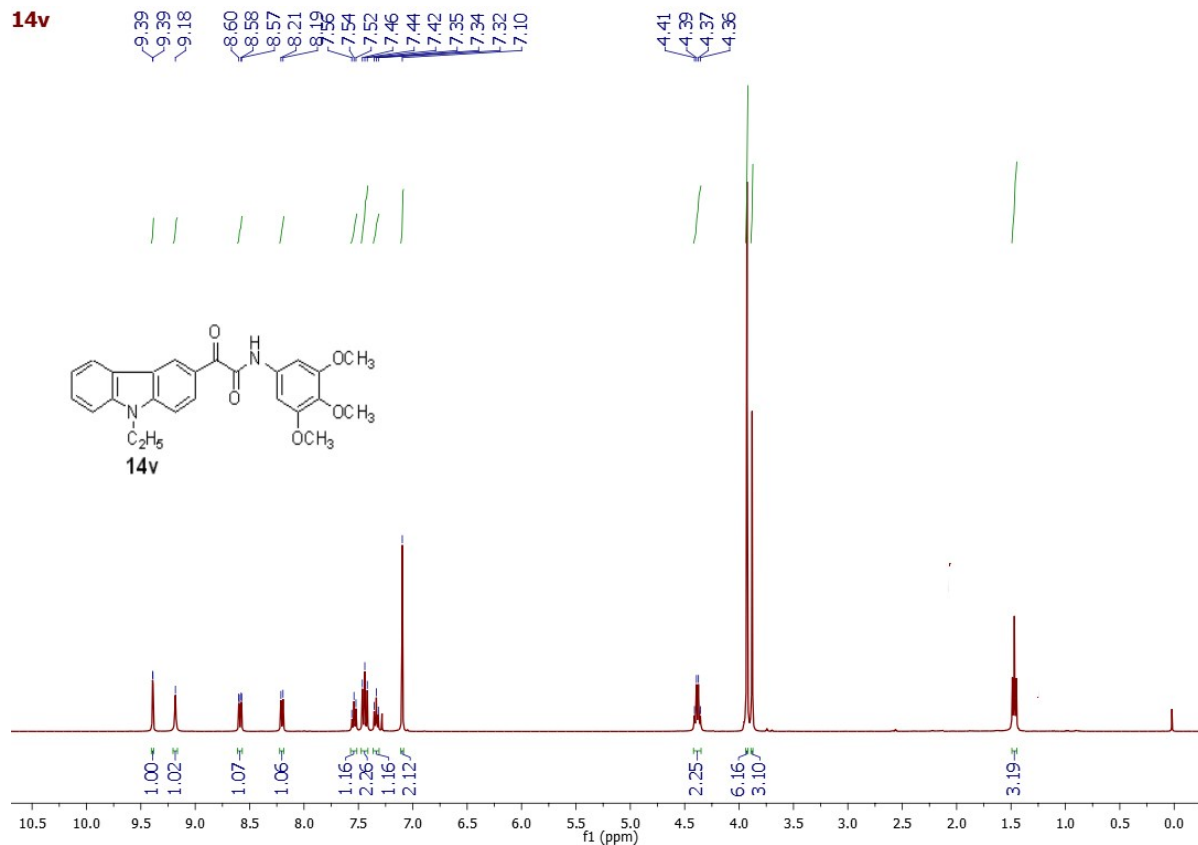

14v

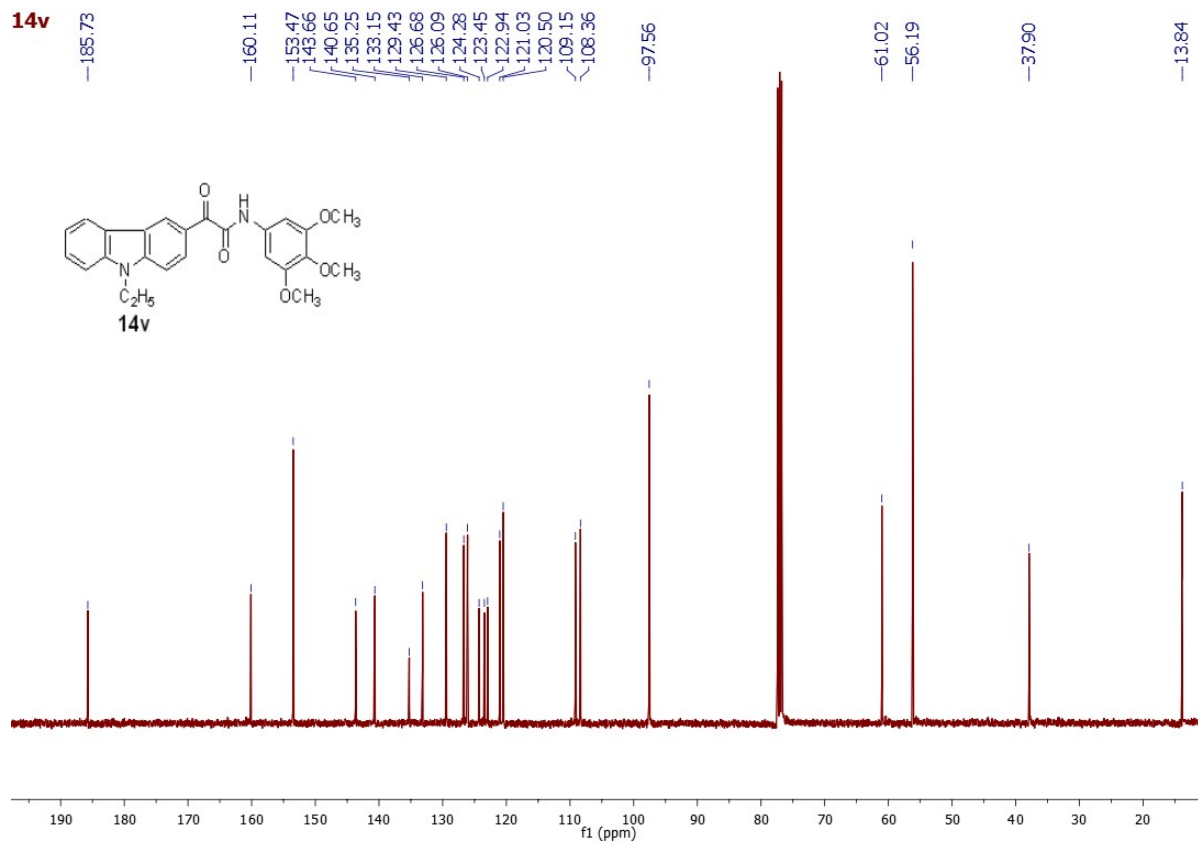

PVRCGA25 7 (0.121) Cn (Top.4. Ht), Sm (Mn. 2x0.75), Sb (1.40.00), Cm (1.48)

2: MS2 ES-  
1.6566

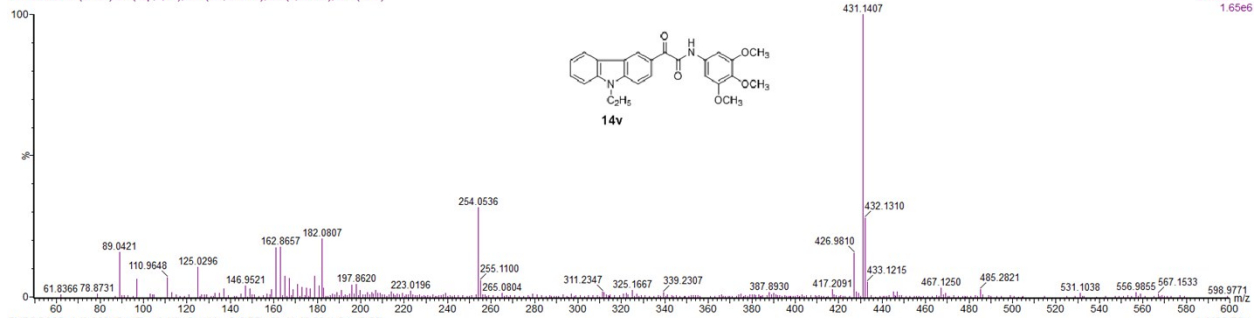

PVRCGA25 4 (0.060) Cn (Top.4. Ht), Sm (Mn. 2x0.75), Sb (1.40.00), Cm (2.56)

1: MS2 ES+  
9.73e7

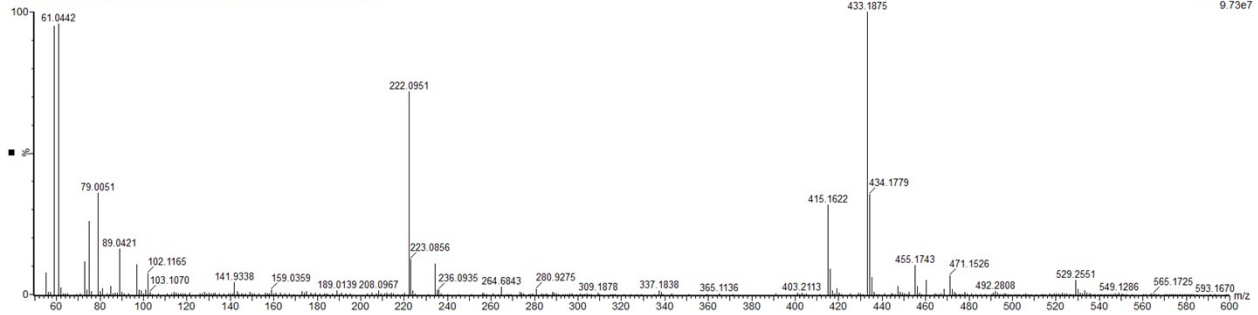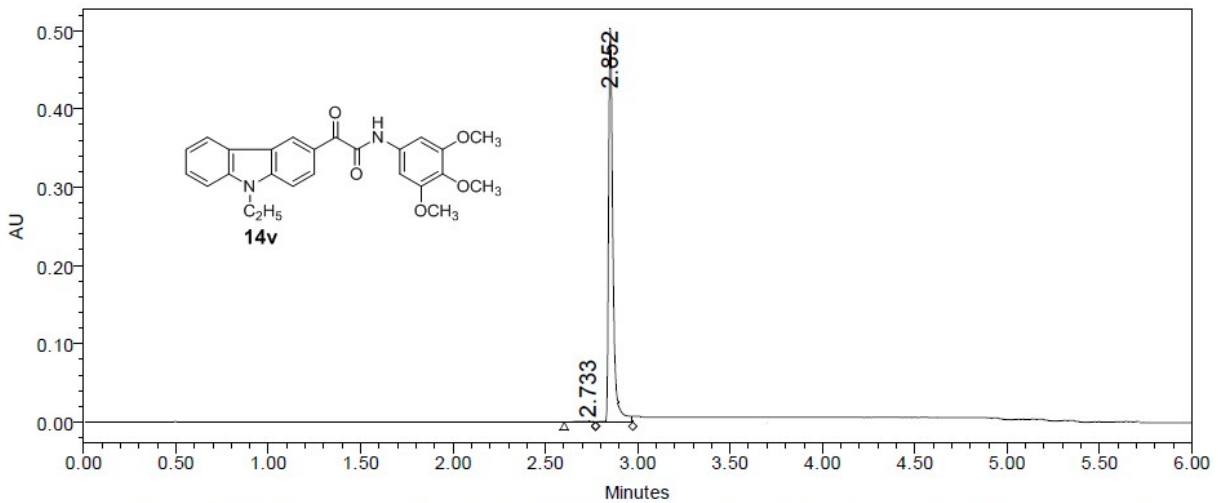

Channel: 2998; Processed Channel: PDA 331.8 nm; Result Id: 1218; Processing Method: pvrcga25a

**Processed Channel Descr.: PDA 331.8 nm**

|   | Processed Channel Descr. | RT    | Area   | % Area | Height |
|---|--------------------------|-------|--------|--------|--------|
| 1 | PDA 331.8 nm             | 2.733 | 3549   | 0.40   | 615    |
| 2 | PDA 331.8 nm             | 2.852 | 887485 | 99.60  | 502696 |



14w

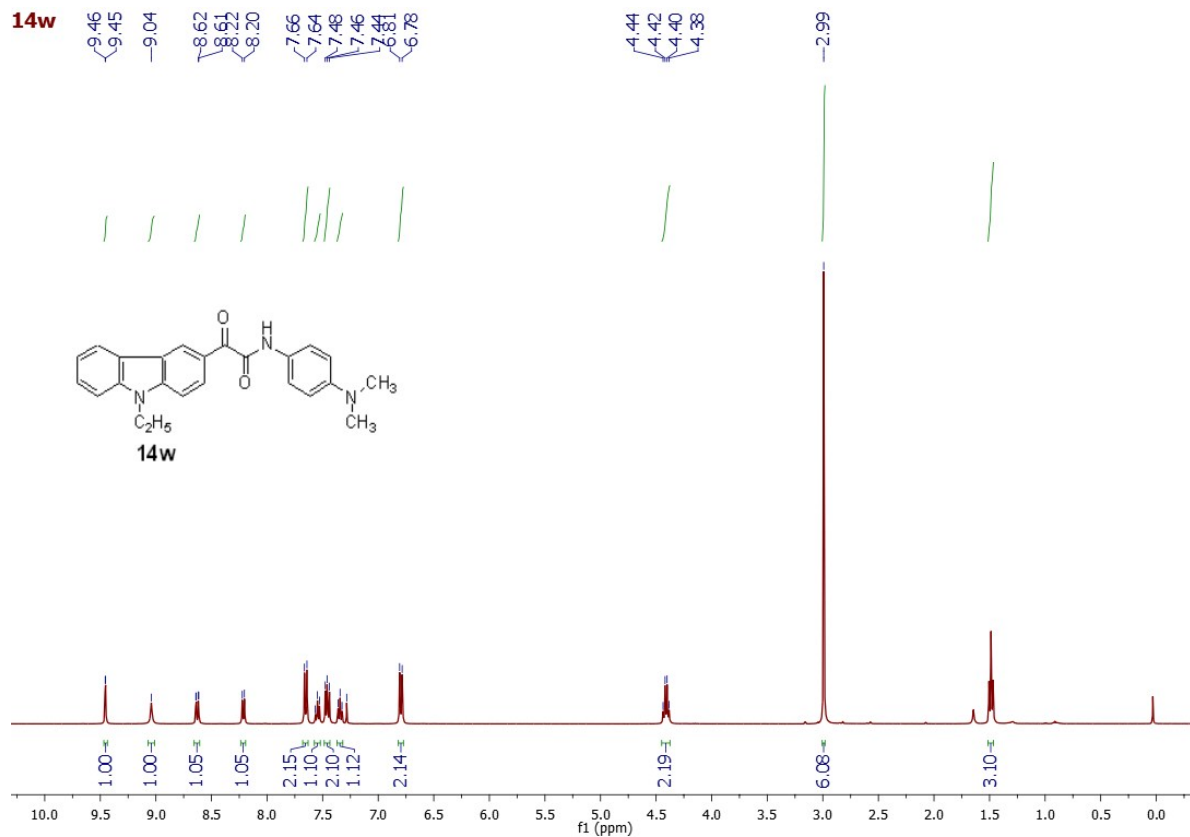

14w

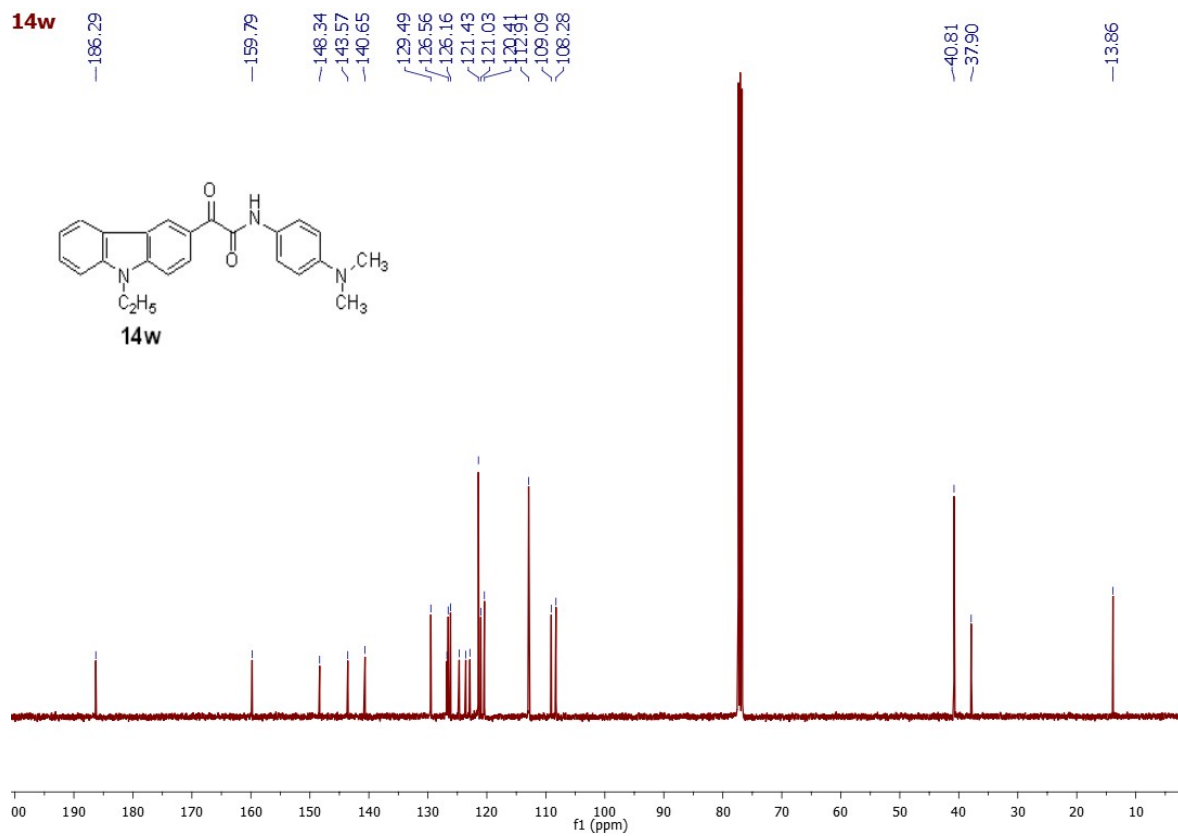

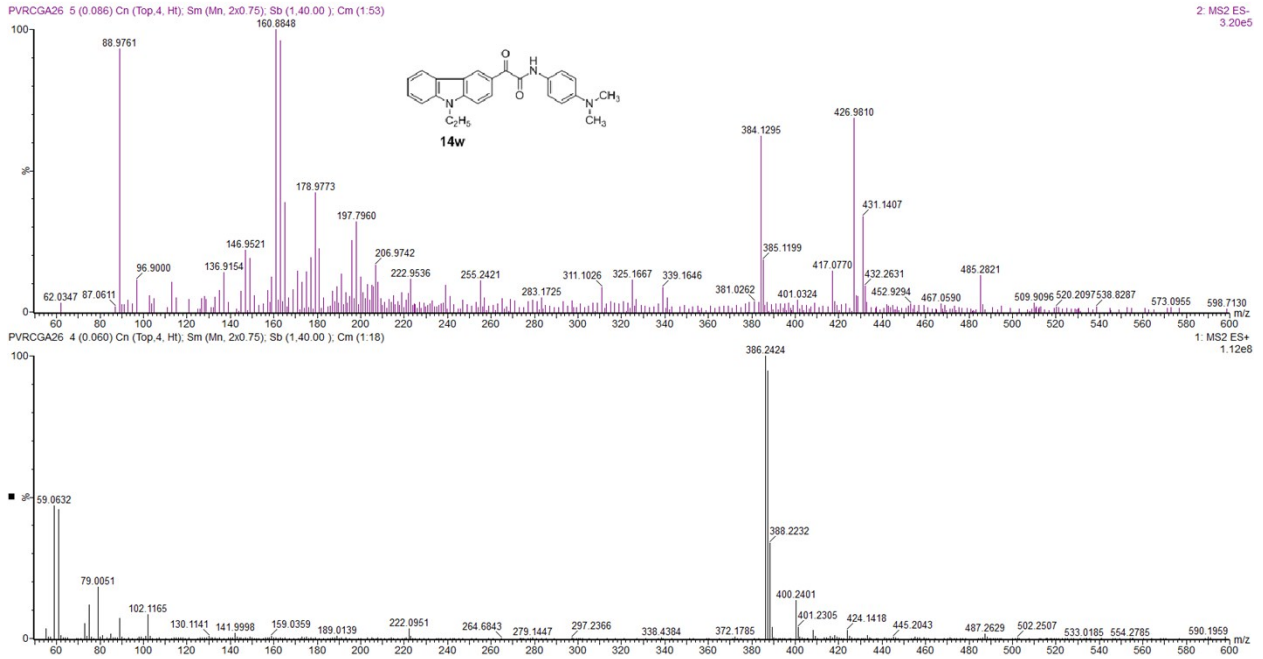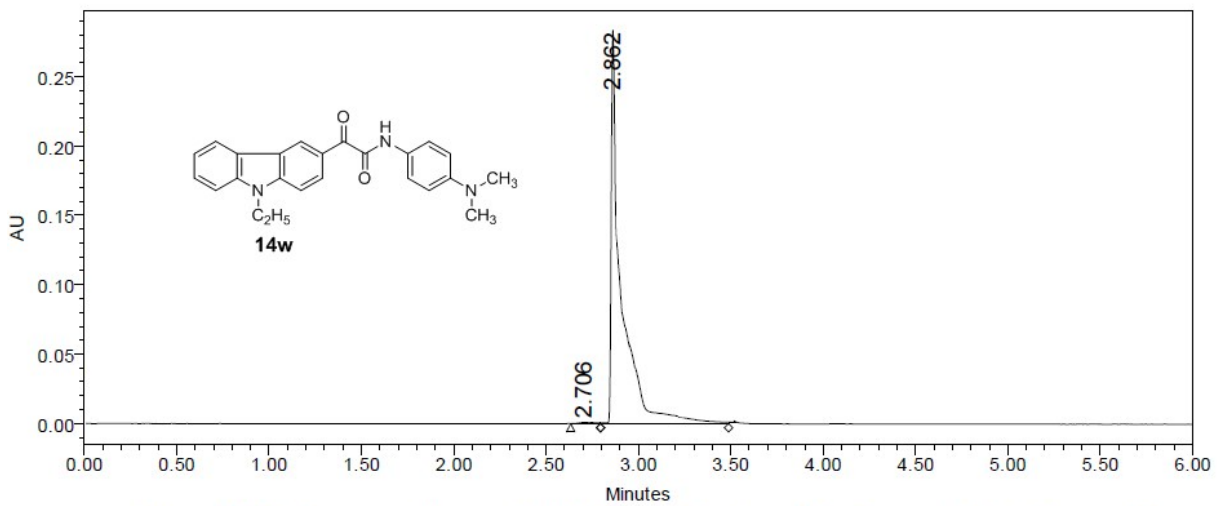

Channel: 2998; Processed Channel: PDA 313.7 nm; Result Id: 1221; Processing Method: pvrcga26

**Processed Channel Descr.: PDA 313.7 nm**

|   | Processed Channel Descr. | RT    | Area    | % Area | Height |
|---|--------------------------|-------|---------|--------|--------|
| 1 | PDA 313.7 nm             | 2.706 | 4387    | 0.29   | 733    |
| 2 | PDA 313.7 nm             | 2.862 | 1492982 | 99.71  | 283845 |

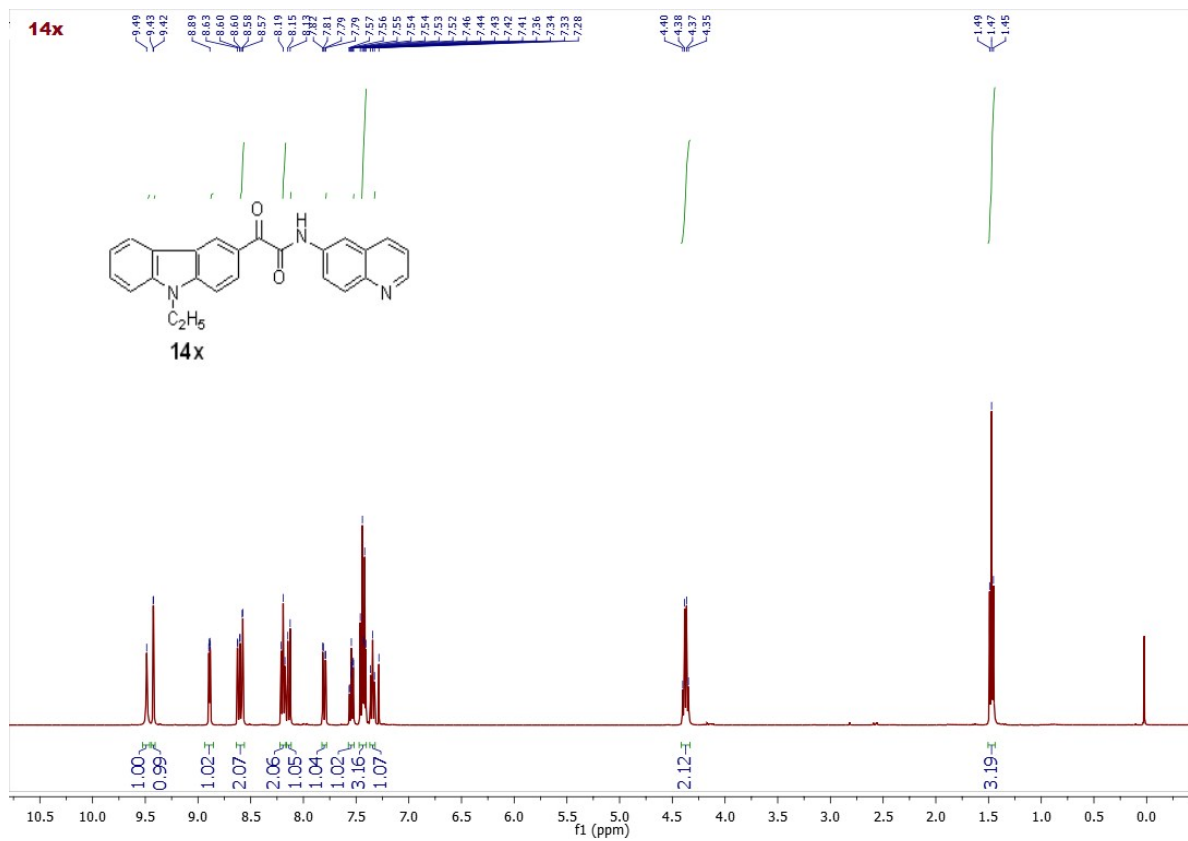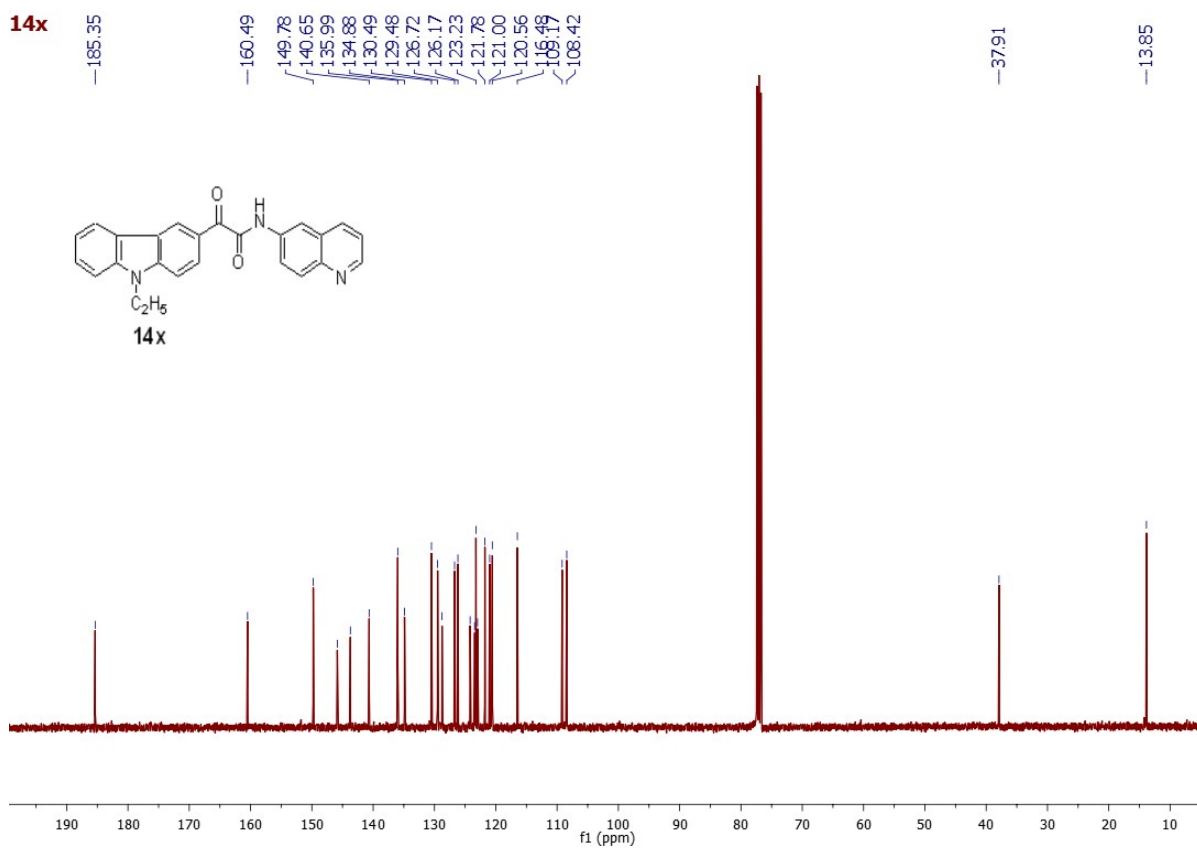

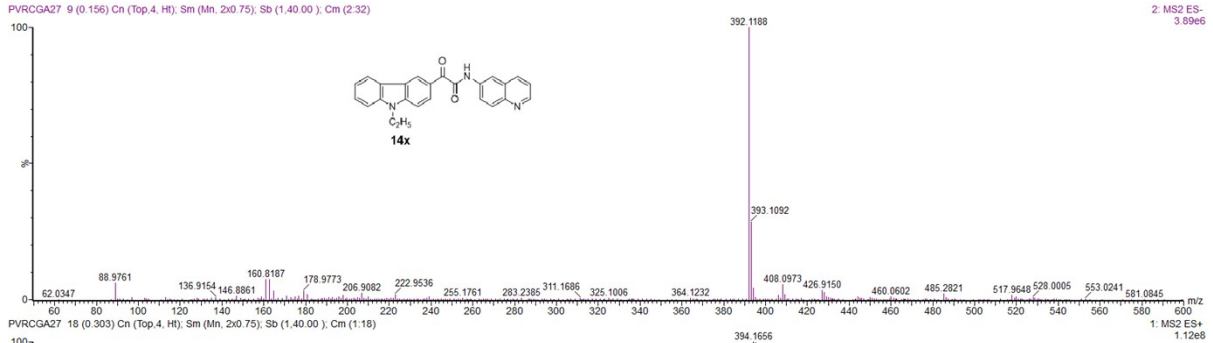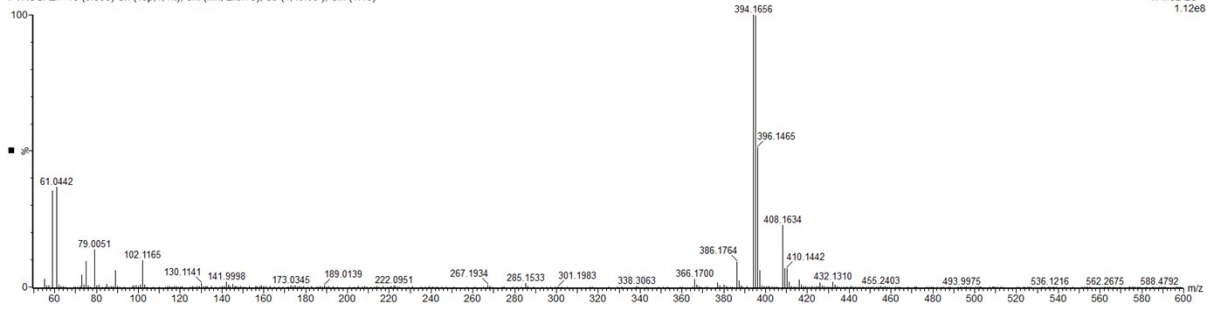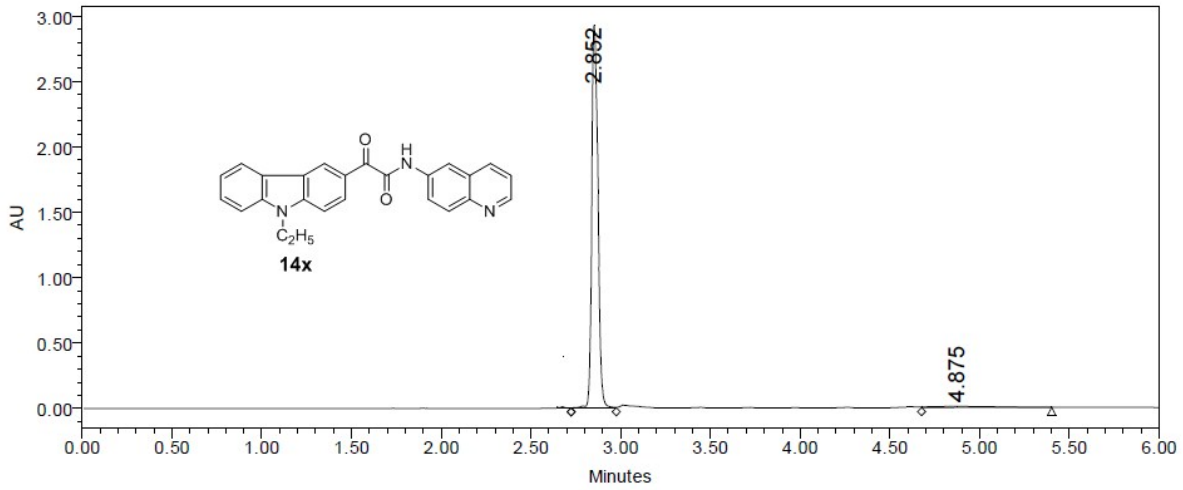

Channel: 2998; Processed Channel: PDA 283.5 nm; Result Id: 1263; Processing Method: pvrcga27

**Processed Channel Descr.: PDA 283.5 nm**

|   | Processed Channel Descr. | RT    | Area     | % Area | Height  |
|---|--------------------------|-------|----------|--------|---------|
| 1 | PDA 283.5 nm             | 2.852 | 10195647 | 98.11  | 2930724 |
| 2 | PDA 283.5 nm             | 4.875 | 195974   | 1.89   | 8858    |
